# Supplementary material for: Siglec-6 mediates the uptake of extracellular vesicles through a noncanonical glycolipid binding pocket
Source: PubMed Central journal article supplement (PMC10122656; doi:10.1038/s41467-023-38030-6), 2023-04-22
Supplement: 41467_2023_38030_MOESM1_ESM.pdf [file 41467_2023_38030_MOESM1_ESM.pdf]

## **Supplementary Information**

### **Siglec-6 mediates the uptake of extracellular vesicles through a noncanonical glycolipid binding pocket**

Edward N. Schmidt<sup>1</sup>, Dimitra Lamprinaki<sup>1</sup>, Kelli A. McCord<sup>1</sup>, Maju Joe<sup>1</sup>, Mirat Sojitra<sup>1</sup>, Ayk Waldow<sup>1</sup>, Jasmine Nguyen<sup>2</sup>, John Monyor<sup>3,4</sup>, Elena N. Kitova<sup>1</sup>, Fahima Mozaneh<sup>1</sup>, Xue Yan Guo<sup>1</sup>, Jaesoo Jung<sup>1</sup>, Jhon R. Enterina<sup>5</sup>, Gour C. Daskhan<sup>1</sup>, Ling Han<sup>1</sup>, Amanda R. Kryslar<sup>3</sup>, Christopher R. Chromwell<sup>3</sup>, Basil P. Hubbard<sup>3#</sup>, Lori J. West<sup>5,6,7</sup>, Marianne Kulka<sup>5,8</sup>, Simonetta Sipione<sup>3,4</sup>, John S. Klassen<sup>1</sup>, Ratmir Derda<sup>1</sup>, Todd L. Lowary<sup>1,9,10</sup>, Lara K. Mahal<sup>1</sup>, Meghan R. Riddell<sup>2</sup>, Matthew S. Macauley<sup>1,5,\*</sup>

<sup>1</sup>Department of Chemistry, University of Alberta, Edmonton, Alberta, Canada

<sup>2</sup>Department of Obstetrics & Gynaecology and Physiology University of Alberta, Edmonton, Alberta, Canada

<sup>3</sup>Department of Pharmacology, University of Alberta, Edmonton, Alberta, Canada

<sup>4</sup>Neuroscience and Mental Health Institute, University of Alberta, Edmonton, Alberta, Canada

<sup>5</sup>Department of Medical Microbiology and Immunology, University of Alberta, Edmonton, Alberta, Canada

<sup>6</sup>Department of Pediatrics, University of Alberta, Edmonton, AB, Canada

<sup>7</sup>Department of Surgery, University of Alberta, Edmonton, AB, Canada

<sup>8</sup>National Research Council, Edmonton, Alberta, Canada

<sup>9</sup>Institute of Biological Chemistry, Academia Sinica, Nangang, Taipei, Taiwan

<sup>10</sup>Institute of Biochemical Sciences, National Taiwan University, Taipei, Taiwan

\*Corresponding Address: 11227 Saskatchewan Dr., University of Alberta, [macauley@ualberta.ca](mailto:macauley@ualberta.ca)

#Present address: Department of Pharmacology and Toxicology, University of Toronto, Toronto, ON, Canada

## Synthetic Schemes and Chemical Characterization

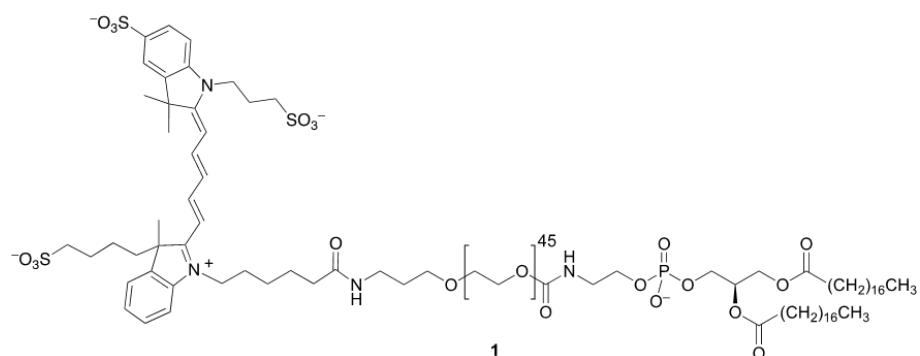

AF647-PEG<sub>45</sub>-DSPE 1 was synthesized as described by Bhattacharjee *et al.*<sup>1</sup>

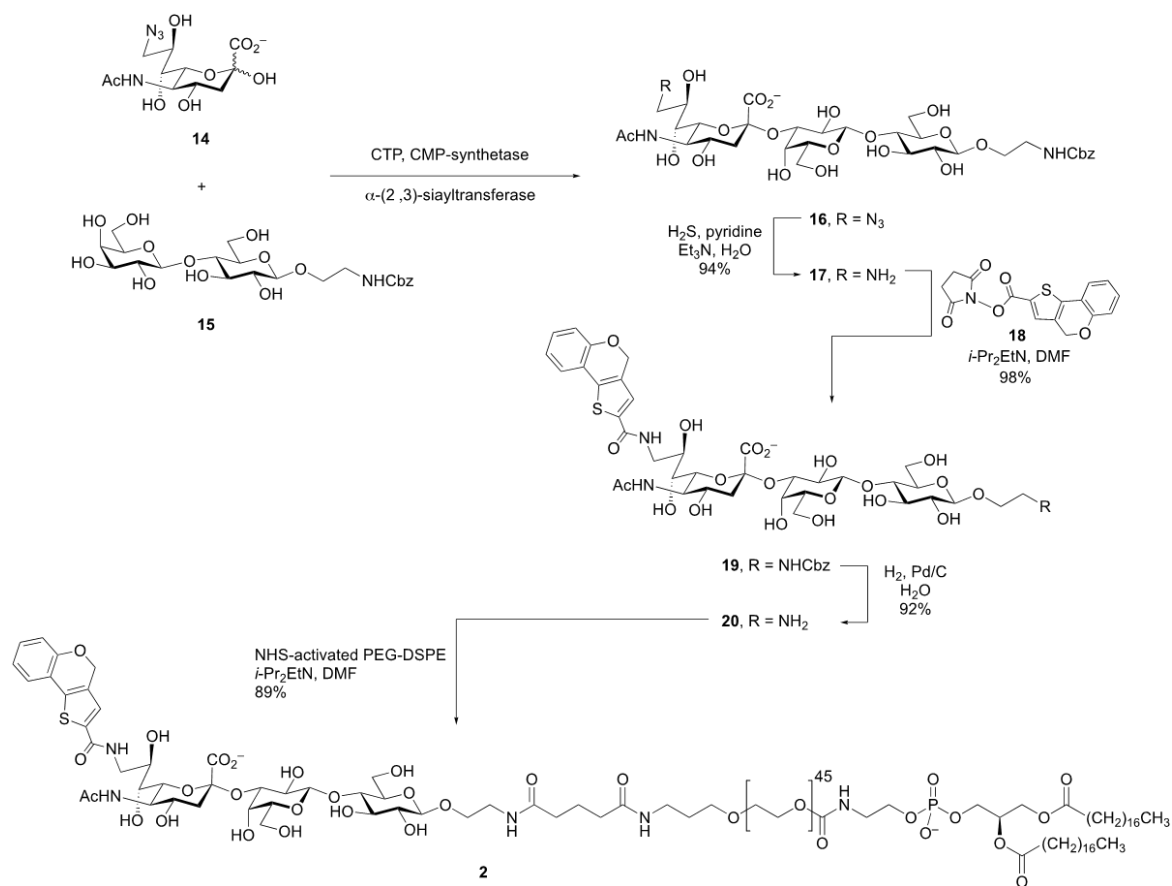

### Siglec-1 ligand-PEG<sub>45</sub>-DSPE 2:

A mixture of 9-azido sialic acid derivative **14**<sup>2</sup> (10 mg, 0.029 mmol), CTP (31 mg, 0.062 mmol), 12 mM MgCl<sub>2</sub> in Tris-HCl buffer (pH 8.6, 285 mL) was treated with CMP-synthetase (25 μL) and the pH of the solution was adjusted to ~9.0 to 9.5 by adding 75 mL of aqueous 1M NaOH and the solution was incubated at 37 °C for 30 min. The progress of the reaction was monitored by TLC and when complete disaccharide **15**<sup>3</sup> (19.3 mg, 0.037 mmol), 0.5 M MgSO<sub>4</sub> and of Tris-HCl buffer (pH 8.6, 560 mL, final concentration 15 mM) and α-(2 →3)-sialyltransferases (0.15 mg/mL, PmSTI) were added. The reaction mixture was further incubated at 37 °C for 2 h. The excess enzymes were quenched by the addition of EtOH (500 μL), the mixture was centrifuged, crude product was washed with EtOH (2 x 100 mL) and the supernatants were collected. The EtOH in the supernatant was removed under reduced pressure and the resulting aqueous solution was frozen at -80 °C and lyophilized to afford a white solid. The crude residue was subjected to P2-gel filtration chromatography using H<sub>2</sub>O as eluent to afford **16** (22.8 mg, 90 %) as a white powder after lyophilization; <sup>1</sup>H NMR (600 MHz, D<sub>2</sub>O) δ (ppm) 7.41–7.37 (m, 5H), 5.09 (s, 2H), 4.72 (d, 1H, *J* = 8.0 Hz), 4.42 (d, 1H, *J* = 8.0 Hz), 4.04 (ddd, 1H, *J* = 21.0, 12.0, 3.0 Hz), 3.94–3.90 (m, 4H), 3.81–3.76 (m, 3H), 3.70

(t, 1H,  $J = 10.0$  Hz), 3.65–3.40 (m, 12H), 3.39 (dd, 1H,  $J = 15.0, 7.8$  Hz), 2.98 (dd, 1H,  $J = 13.2, 9.6$  Hz), 2.67 (dd, 1H,  $J = 12.6, 4.8$  Hz), 1.99 (s, 3H,  $\text{NHCOCH}_3$ ), 1.70 (t,  $J = 12.6$  Hz, 1H). HRMS (ESI) calculated for  $m/z$   $[\text{M} - \text{H}]^+$  calcd for  $\text{C}_{33}\text{H}_{49}\text{N}_5\text{O}_{20}$ : 835.2971, found: 834.2889.

Trisaccharide **16** (10 mg, 0.011 mmol) was dissolved in a mixture of pyridine (1.8 mL),  $\text{Et}_3\text{N}$  (125  $\mu\text{L}$ ) and  $\text{H}_2\text{O}$  (125  $\mu\text{L}$ ) and the reaction mixture were cooled to 0 °C in an ice bath for approximately 15 min.  $\text{H}_2\text{S}$  gas was bubbled through the solution for 5 min, the reaction mixture turned an intense blue colour and the round bottom flask was capped and stirred overnight at room temperature. After completion of the reaction, the solvent was evaporated, the crude product was dissolved in methanol (10 mL) and the resulting solution was centrifuged. The supernatant was collected, concentrated and the crude mixture was purified by P2-gel filtration chromatography using  $\text{H}_2\text{O}$  as eluent to afford **17** (9.1 mg, 94 %) as a white powder after lyophilization. HRMS (ESI) calculated for  $m/z$   $[\text{M} - \text{H}]^+$  calcd for  $\text{C}_{33}\text{H}_{51}\text{N}_3\text{O}_{20}$ : 808.2993, found: 808.3005.

Amine **17** (5.0 mg, 6.18 mmol, 1 equiv.) and NHS-activated ester **18**<sup>4</sup> (2.5 mg, 7.72  $\mu\text{mol}$ , 1.25 equiv.) were dissolved in anhydrous DMF (0.5 mL). *N,N*-Diisopropylethylamine (1.87 mL, 18.54 mmol, 3 equiv.) was added to the reaction mixture, and the solution was stirred overnight at room temperature. DMF was removed under reduced pressure and the residue was co-evaporated with toluene (2 x 5 mL). The crude product was dissolved in  $\text{H}_2\text{O}$  (5 mL) and hydrolyzed **18** was separated from the desired product **19** through successive extraction with EtOAc (5 mL, 5–6 times). TLC confirmed removal of hydrolyzed **18**. The aqueous layers were collected and lyophilized to afford **19** (5.52 mg, 98 %) as a white powder;  $^1\text{H}$  NMR (500 MHz,  $\text{D}_2\text{O}$ )  $\delta$  (ppm) 7.82 (t, 1H,  $J = 7.5$  Hz), 7.76–7.72 (m, 2H), 7.68–7.66 (m, 2H), 7.42–7.40 (m, 5H), 5.10 (s, 2H), 4.49 ( $J = 8.0$  Hz, 1H), 4.43 (d, 1H,  $J = 8.0$  Hz), 4.08 (dd, 1H,  $J = 10.0, 3.5$  Hz), 4.06–4.04 (m, 2H), 3.94–3.85 (m, 4H), 3.78–3.52 (m, 15H), 3.39–3.35 (m, 2H), 3.01 (dd, 1H,  $J = 12.5, 9.5$  Hz), 2.73 (dd, 1H,  $J = 12.5, 4.5$  Hz), 2.01 (s, 3H,  $\text{NHCOCH}_3$ ), 1.78 (t, 1H,  $J = 12.5$  Hz). HRMS (ESI) calculated for  $m/z$   $[\text{M} - \text{H}]^+$  calcd for  $\text{C}_{45}\text{H}_{56}\text{N}_3\text{O}_{22}\text{S}$ : 1023.3154, found: 1023.3145.

Trisaccharide **19** (5.0 mg, 4.88 mmol) was dissolved in  $\text{H}_2\text{O}$  (2 mL), followed by addition of Pd/C (10 mg, 5 mol%). Hydrogen gas was bubbled through the solution and the mixture was stirred overnight under a hydrogen atmosphere. After completion of reaction, the catalyst was removed by filtration though

a Celite pad. The solvent was evaporated, and the mixture was purified using a C18 column (gradient elution from H<sub>2</sub>O to MeOH/H<sub>2</sub>O (10 % to 50 %, V/V)) to produce **20** (4.0 mg, 92 %) as white solid after lyophilization of the fractions containing the desired product; <sup>1</sup>H NMR (600 MHz, D<sub>2</sub>O) δ (ppm) 7.38–7.37 (m, 2H), 7.24 (t, 1H, *J* = 7.4 Hz), 7.01 (t, 1H, *J* = 7.4 Hz), 6.93 (d, 1H, *J* = 7.8 Hz), 5.19 (s, 2H), 4.34 (d, 2H, *J* = 7.8 Hz), 4.03 (dd, 1H, *J* = 9.6, 3.0 Hz), 3.96 (ddd, 1H, *J* = 11.4, 9.6, 3.0 Hz), 3.88 (d, 1H, *J* = 3.0 Hz), 3.83–3.80 (m, 4H), 3.70–3.64 (m, 8H), 3.56–3.46 (m, 8H), 3.44–3.32 (m, 2H), 3.16 (dd, 1H, *J* = 12.5, 9.5 Hz), 2.01 (t, 1H, *J* = 4.8 Hz), 2.73 (dd, 1H, *J* = 12.5, 4.8 Hz), 1.99 (s, 3H, NHCOCH<sub>3</sub>), 1.75 (t, 1H, *J* = 12.5 Hz). <sup>13</sup>C NMR (125 MHz, D<sub>2</sub>O) δ (ppm) 176.0, 174.6, 164.8, 152.8, 137.8, 137.1, 133.3, 131.4, 127.5, 124.8, 123.8, 120.2, 117.6, 103.7, 102.88, 100.9, 79.1, 77.0, 76.3, 75.6, 75.0, 73.9, 73.6, 71.9, 70.9, 70.2, 69.2, 68.3, 67.6, 66.7, 63.5, 62.0, 60.8, 52.7, 49.9, 43.8, 40.5, 23.0. HRMS (ESI-MS) calculated for *m/z* [M + Na]<sup>+</sup> calcd for C<sub>37</sub>H<sub>51</sub>N<sub>3</sub>NaO<sub>20</sub>S: 912.2679, found: 912.2681.

A mixture of **20** (1 mg, 0.91 mmol, 1.25 equiv.) and NHS-activated PEG-DSPE (2.5 mg, 0.83 mmol, 1 equiv.) were dissolved in anhydrous DMF (100–150 μL, ~10 mM) and placed in a 0.5 mL centrifuge tube at room temperature. The reaction mixture was degassed with N<sub>2</sub>. A diluted solution of DIPEA (1.50–2.0 equiv.) in dry DMF was added carefully to adjust pH of the solution ~8.0 and the reaction mixture was stored at room temperature overnight. An aliquot of the reaction mixture was taken for TLC (CHCl<sub>3</sub>–MeOH–H<sub>2</sub>O = 75:23:2) analysis. The coupling was performed under anhydrous condition to avoid hydrolysis of the NHS-activated PEG-DSPE. The solvent was removed under *vacuum*, and the crude product was dissolved in water. The crude product was loaded to Sephadex G-100 gel filtration column using H<sub>2</sub>O as an eluent to afford **20**-PEG-DSPE conjugate as a white powder after lyophilization of fractions having the desired product. Yield: (3.8 mg, 89 %), coupling efficiency 62 %.

<sup>1</sup>H NMR (600 MHz, MeOD<sub>4</sub>): δ 7.49 (d, *J* = 7.8 Hz, 1H), 7.38–7.33 (m, 1H), 7.19 (t, *J* = 7.8 Hz, 1H), 6.97 (t, *J* = 7.8 Hz, 1H), 7.99 (d, *J* = 7.8 Hz, 1H), 5.25 (s, 2H), 4.44 (d, *J* = 8.0 Hz, 1H), 4.42 (d, *J* = 8.0 Hz, 1H), 4.31 (d, *J* = 7.8 Hz, 1H), 4.19–3.98 (m, 2H), 4.97 (t, *J* = 5.4 Hz, 1H), 3.90–4.86 (m, 2H), 3.74–3.71 (m, 2H), 3.64 (broad s, 123H), 3.3–3.34–3.22 (m, 8H), 2.35–2.29 (m, 4H), 2.23–2.19 (m, 4H), 1.99 (s, 3H), 1.89–1.86 (m, 2H), 1.76–1.73 (m, 2H), 1.60–1.58 (m, 2H), 1.28 (broad s, 64H), 0.89 (s, 6H); The MALDI-TOF-MS spectrum showed the average mass centered at 3.8 kDa and the expected average mass was 3.8 kDa. The coupling efficiency was determined through assigning underline signals of the aromatic protons signals

at 7.49 ppm (d), 7.38–7.33 ppm (m), 6.97 (t) and 7.99 (d) of the phenyl moieties at C9 position of bifunctionally substituted Neu5Ac with terminal methyl groups at 0.89 ppm (s) of the DSPE lipid.

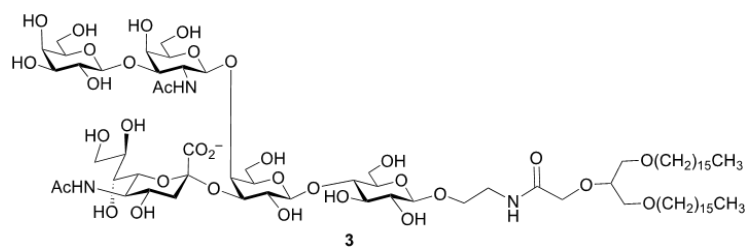

**Neoglycolipid 3** was prepared as described previously by Han et *al.*<sup>5</sup>

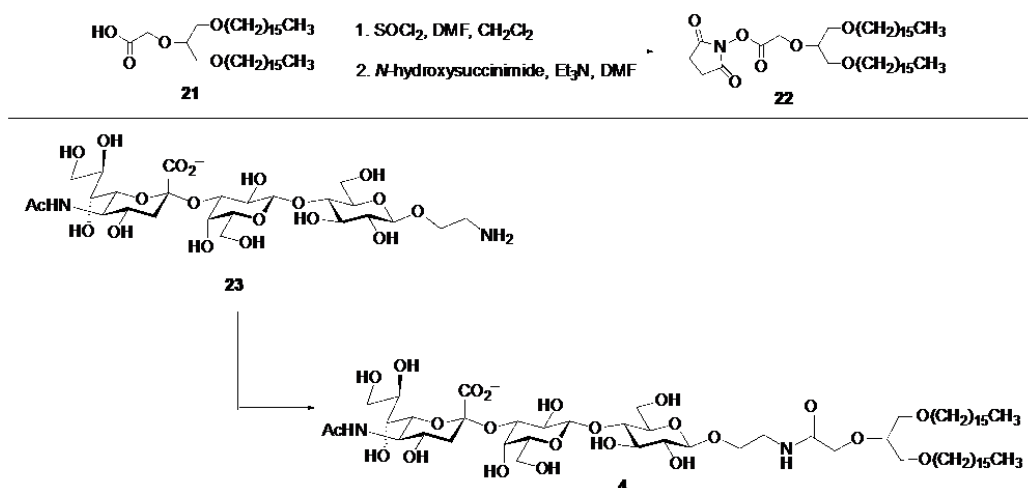

**Neoglycolipid 4.** To a stirred solution of acid **21** (8.0 mg, 13.4  $\mu$ mol) in CH<sub>2</sub>Cl<sub>2</sub> (3 mL) were added thionyl chloride (5.0  $\mu$ L, 68.0  $\mu$ mol) and dry DMF (20.0  $\mu$ L) successively at room temperature. After heating at reflux overnight, the solution was cooled, the solvent was evaporated, and the residue was dried under high vacuum (2.5 h). The dried acyl chloride was dissolved in CH<sub>2</sub>Cl<sub>2</sub> (3 mL), *N*-hydroxysuccinimide (6.0 mg, 52.0  $\mu$ mol) and triethylamine (5.0  $\mu$ L, 36.0  $\mu$ mol) were added at 0 °C and the solution was heated at reflux overnight. After cooling to room temperature, the solution was diluted with CH<sub>2</sub>Cl<sub>2</sub> (5 mL), washed with brine, dried over Na<sub>2</sub>SO<sub>4</sub>, filtered, and the filtrate was concentrated to give the NHS-ester **22**, which was used directly for the next step without any further purification.

Trisaccharide amine **23**<sup>6</sup> (2.0 mg, 3.0  $\mu$ mol) was dissolved in *N,N*-dimethylacetamide (0.4 mL), and *N,N*-diisopropylethylamine (5  $\mu$ L, 28.0  $\mu$ mol) was added. This solution was then added to a glass vial containing **22** followed by THF (0.3 mL) and the mixture was stirred overnight at room temperature. The reaction mixture was directly loaded and purified by size exclusion column chromatography (Sephadex-LH20, CH<sub>2</sub>Cl<sub>2</sub>–CH<sub>3</sub>OH, 1:1) to afford **4** (0.9 mg, 25 %). *R<sub>f</sub>* 0.3, EtOAc–CH<sub>3</sub>OH–HOAc–H<sub>2</sub>O (36:9:9:6); <sup>1</sup>H NMR (700 MHz, CD<sub>3</sub>OD plus a few drops of CDCl<sub>3</sub>,  $\delta$ <sub>H</sub>) 4.42 (d, 1H, *J* = 7.8 Hz, H-1), 4.31 (d, 1H, *J* = 7.8 Hz, H-1), 4.15–4.10 (m, 2H), 4.05 (dd, 1H, *J* = 3.1, 9.7 Hz), 3.96–3.90 (m, 3H), 3.90–3.82 (m, 3H), 3.80–3.74 (m, 2H), 3.74–3.40 (m, 24H), 3.26 (dd, 1H, *J* = 7.9, 7.9 Hz), 3.21 (ddd, 2H, *J* = 1.6, 3.2, 4.8 Hz), 2.85 (dd, 1H, *J* = 4.2, 12.5 Hz), 2.79 (dd, 1H, *J* = 7.5, 7.5 Hz), 2.56 (dd, 1H, *J* = 7.5, 7.5 Hz), 2.00 (s, 3H, NHCOCH<sub>3</sub>), 1.75–1.60 (m, 5H), 1.40–1.20 (m, 56H), 0.86 (dd, 6H, *J* = 6.9 Hz); HRMS (ESI) calcd. for [M – H]<sup>–</sup> C<sub>62</sub>H<sub>116</sub>N<sub>2</sub>O<sub>23</sub> 1255.7896, found 1255.7909.



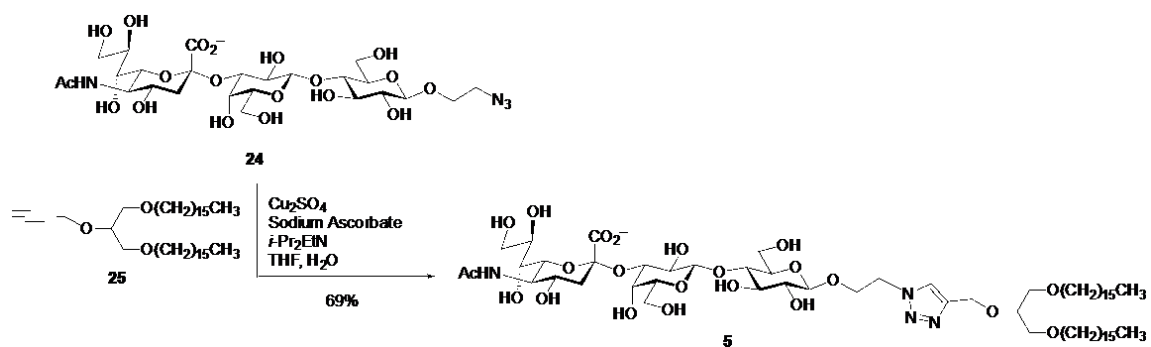

**Neoglycolipid 5.** To a stirred solution of trisaccharide azide **24**<sup>7</sup> (8.0 mg, 11.0  $\mu\text{mol}$ ) and alkyne **25**<sup>67</sup> (15.0 mg, 26.0  $\mu\text{mol}$ ) in a mixture of THF (3 mL) and water (3 mL) at room temperature were added *N,N*-diisopropylethylamine (6.0  $\mu\text{L}$ , 34.0  $\mu\text{mol}$ ), copper (II) sulfate pentahydrate (53.0 mg, 212.0  $\mu\text{mol}$ ) and L-ascorbic acid sodium salt (81.0 mg, 408.0  $\mu\text{mol}$ ) successively. The reaction mixture was shielded from light (aluminum foil) and stirred overnight. The reaction mixture was then concentrated, and the residue was purified by size exclusion column chromatography (Sephadex-LH-20,  $\text{CH}_2\text{Cl}_2$ – $\text{CH}_3\text{OH}$ , 1:1) to afford **5** (10.0 mg, 69 %).  $R_f$  0.3, EtOAc– $\text{CH}_3\text{OH}$ –HOAc– $\text{H}_2\text{O}$  (36:9:9:6);  $^1\text{H NMR}$  (700 MHz,  $\text{CD}_3\text{OD}$  plus a few drops of  $\text{CDCl}_3$ ,  $\delta_{\text{H}}$ ) 8.03 (s, 1H), 4.65–4.55 (m, 2H), 4.39 (d, 1H,  $J = 7.0$  Hz, H-1), 4.31 (d, 1H,  $J = 7.8$  Hz, H-1), 4.24–4.20 (m, 2H), 3.95–3.40 (m, 28H), 3.22–3.20 (m, 1H), 2.90–2.80 (m, 1H), 2.10–2.00 (m, 2H), 1.99 (s, 3H,  $\text{NHCOCH}_3$ ), 1.70–1.50 (m, 5H), 1.40–1.20 (m, 56H), 0.86 (dd, 6H,  $J = 6.9$  Hz); HRMS (ESI) calcd. for  $[\text{M} - \text{H}]^-$   $\text{C}_{63}\text{H}_{116}\text{N}_4\text{O}_{22}$  1279.8008, found 1279.8014.

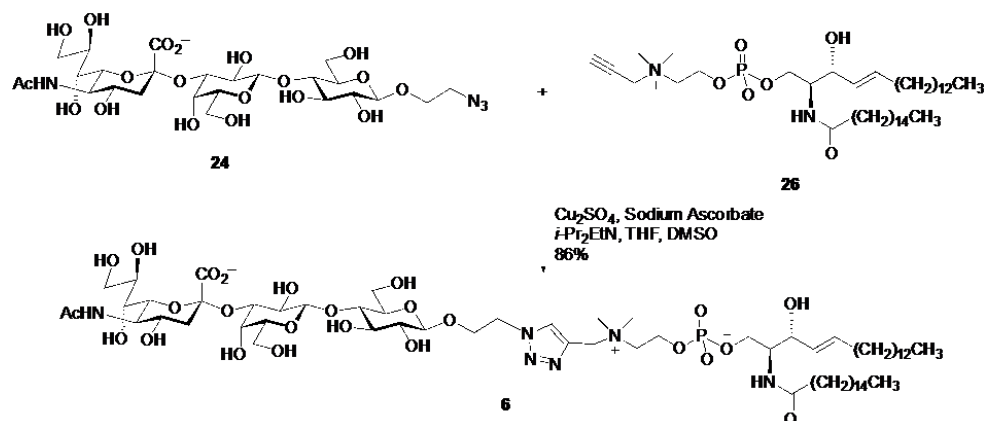

**Neoglycolipid 6.** To a stirred solution of trisaccharide azide **24**<sup>7</sup> (2.2 mg, 3.1  $\mu\text{mol}$ ) in water (0.5 mL), alkyne **26** (Avanti Polar Lipids, Inc., USA) (1.0 mg, 1.4  $\mu\text{mol}$ ) in a mixture of THF (0.3 mL) and DMSO (0.5 mL) was added at room temperature followed by *N,N*-diisopropylethylamine (3.0  $\mu\text{L}$ , 17.0  $\mu\text{mol}$ ). Copper (II) sulfate pentahydrate (21.0 mg, 84.0  $\mu\text{mol}$ ) and L-ascorbic acid sodium salt (37.0 mg, 186.0  $\mu\text{mol}$ ) were then added successively. The reaction mixture was shielded from light (aluminum foil) and stirred overnight. After 24 h, copper (II) sulfate pentahydrate (14.0 mg, 56.0  $\mu\text{mol}$ ), and L-ascorbic acid sodium salt (30.0 mg, 151.0  $\mu\text{mol}$ ) each dissolved in 0.1 mL water were added again successively and stirring continued overnight. The reaction mixture was then diluted with  $\text{CH}_3\text{OH}-\text{H}_2\text{O}$  (1:1, 0.2 mL) stirred well and filtered through a cotton plug to remove most of the insoluble salts. The filtrate was directly loaded on to a C-18 column and purified by gradient elution ( $\text{H}_2\text{O}$  to  $\text{CH}_3\text{OH}-\text{H}_2\text{O}$  to neat  $\text{CH}_3\text{OH}$ ) to afford **6** (1.7 mg, 86 %).  $R_f$  0.1,  $\text{EtOAc}-\text{CH}_3\text{OH}-\text{HOAc}-\text{H}_2\text{O}$  (18:9:9:6);  $^1\text{H NMR}$  (700 MHz,  $\text{CD}_3\text{OD}$  plus a few drops of  $\text{CDCl}_3$ ,  $\delta_{\text{H}}$ ) 8.4 (s, 1H), 5.74–5.66 (m, 1H), 5.48–5.42 (m, 1H), 4.75 (s, 2H), 4.73–4.70 (m, 2H), 4.56 (s, 1H), 4.42 (d, 1H,  $J = 7.6$  Hz, H-1), 4.39–4.34 (m, 2H), 4.32 (d, 1H,  $J = 7.8$  Hz, H-1), 4.28–4.24 (m, 1H), 4.20–4.10 (m, 1H), 4.10–3.40 (m, 28H), 3.23–3.20 (m, 2H), 3.20 (s, 3H), 3.23–3.20 (m, 2H), 2.90–2.84 (m, 1H), 2.65 (s, 3H), 2.22–2.14 (m, 2H), 2.06–2.02 (m, 2H), 2.00 (s, 3H,  $\text{NHCOCH}_3$ ), 1.76–1.50 (m, 5H), 1.40–1.20 (m, 52H), 0.90 (dd, 6H,  $J = 6.9$  Hz); HRMS (ESI) calcd. for  $[\text{M} - \text{H}]^- \text{C}_{66}\text{H}_{121}\text{N}_6\text{O}_{25}\text{P}$  1427.8046, found 1427.8048.

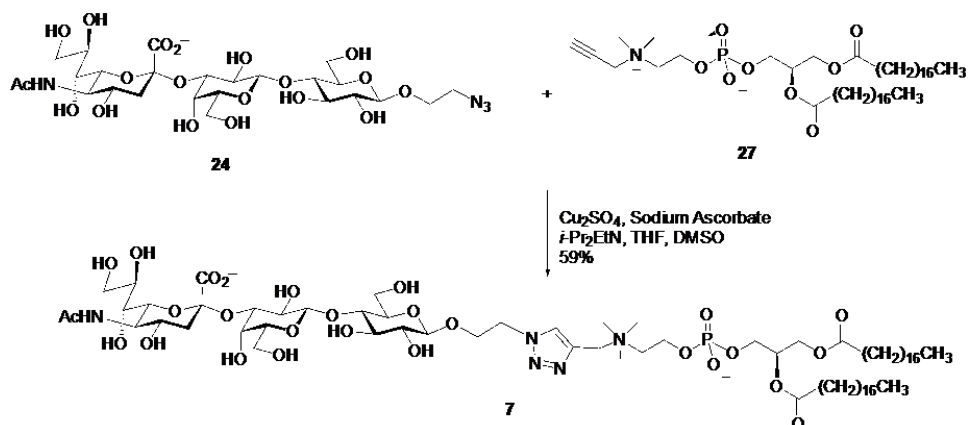

**Neoglycolipid 7.** To a stirred solution of trisaccharide azide **24**<sup>7</sup> (2.2 mg, 3.1  $\mu\text{mol}$ ) in water (0.6 mL), alkyne **27** (Avanti Polar Lipids, Inc., USA) (1.0 mg, 1.2  $\mu\text{mol}$ ) in a mixture of THF (0.3 mL) and DMSO (0.5 mL) was added at room temperature followed by *N,N*-diisopropylethylamine (3.0  $\mu\text{L}$ , 17.0  $\mu\text{mol}$ ). Copper (II) sulfate pentahydrate (23.0 mg, 92.0  $\mu\text{mol}$ ) and L-ascorbic acid sodium salt (54.0 mg, 272.0  $\mu\text{mol}$ ) were then added successively. The reaction mixture was shielded from light (aluminum foil) and stirred overnight. After 24 h, copper (II) sulfate pentahydrate (16.0 mg, 64.0  $\mu\text{mol}$ ), and L-ascorbic acid sodium salt (34.0 mg, 171.0  $\mu\text{mol}$ ) each dissolved in 0.05 mL water were added again successively along with another 0.05 mL each of THF and DMSO and stirring continued overnight. The reaction mixture was then diluted with  $\text{CH}_3\text{OH-H}_2\text{O}$  (1:1, 0.2 mL) stirred well and filtered through a cotton plug to remove most of the insoluble salts. The filtrate was directly loaded onto a C-18 column and purified by gradient elution ( $\text{H}_2\text{O}$  to  $\text{CH}_3\text{OH-H}_2\text{O}$  to neat  $\text{CH}_3\text{OH}$ ) to afford **7** (1.1 mg, 59 %).  $R_f$  0.21,  $\text{EtOAc-CH}_3\text{OH-HOAc-H}_2\text{O}$  (18:9:9:6);  $^1\text{H NMR}$  (700 MHz,  $\text{CD}_3\text{OD}$  plus a few drops of  $\text{CDCl}_3$ ,  $\delta_{\text{H}}$ ) 8.5 (s, 1H), 5.38–5.40 (m, 2H), 5.40–5.32 (m, 1H), 4.76 (s, 2H), 4.73–4.70 (m, 2H), 4.48–4.43 (m, 2H), 4.42 (d, 1H,  $J = 7.9$  Hz, H-1), 4.39–4.34 (m, 2H), 4.32 (d, 1H,  $J = 7.9$  Hz, H-1), 4.24–4.17 (m, 1H), 4.10–3.40 (m, 28H), 3.24–3.19 (m, 2H), 3.18 (s, 3H), 2.90–2.84 (m, 1H), 2.65 (s, 3H), 2.36–2.30 (m, 2H), 2.22–2.16 (m, 2H), 2.00 (s, 3H,  $\text{NHCOCH}_3$ ), 1.66–1.50 (m, 6H), 1.40–1.20 (m, 60H), 0.90 (dd, 6H,  $J = 6.9$  Hz); HRMS (ESI) calcd. for  $[\text{M} - \text{H}]^-$   $\text{C}_{71}\text{H}_{130}\text{N}_5\text{O}_{27}\text{P}$  1514.8618, found 1514.8631.

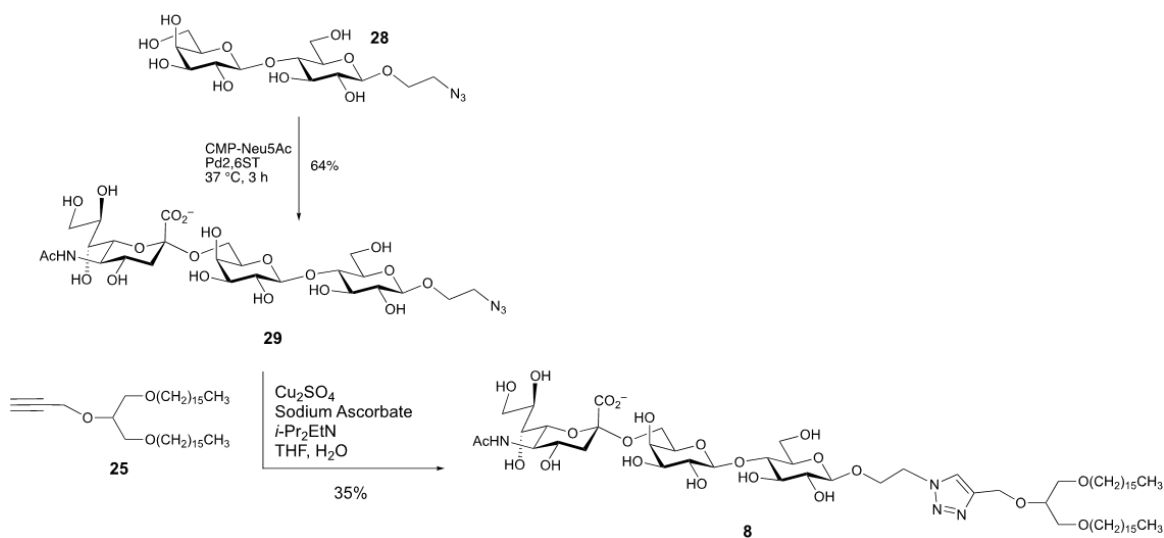

**Neoglycolipid 8.** Lactoside **28**<sup>8</sup> (1.5 mg, 0.012 mmol), CMP-Sialic acid (3.4 mg, 0.016 mmol), and MgSO<sub>4</sub> (10 mM) were dissolved in Tris-HCl buffer (100 mM, 340  $\mu$ L, pH 8.8). Pd<sub>2</sub>,6ST (0.15 mg/mL) recombinant shrimp alkaline phosphatase<sup>9</sup> (1  $\mu$ L) were added to the mixture and the reaction was placed in a shaking incubator (37 °C, 3 h). The reaction was monitored using TLC in *i*-PrOH–NH<sub>4</sub>OH–H<sub>2</sub>O (5:2:1) and stopped by dilution with 4 volumes of cold 95 % ethanol. The precipitated protein was centrifuged (3700 rcf, 15 min) and the supernatant was carefully decanted into a round bottom flask and concentrated. The residue was resuspended in Milli-Q water and purified on a P2 gel filtration equilibrated in Milli-Q water giving compound **29** (1.1 mg, 64 %). <sup>1</sup>H NMR (700 MHz, D<sub>2</sub>O)  $\delta$  = 4.54 (d, 1H, *J* = 7.7 Hz), 4.42 (d, 1H, *J* = 7.7 Hz), 4.02–4.08 (m, 1H), 3.94–4.01 (m, 5H), 3.78–3.93 (m, 4H), 3.59–3.77 (m, 5H), 3.49–3.58 (m, 6H), 3.42–3.62 (m, 2H), 2.74 (dd, 1H, *J* = 7.7, 12.6 Hz), 2.03 (s, 3 H), 1.80 (app t, 1H, *J* = 11.9 Hz). HRMS (ESI) calcd for *m/z* [M – H]<sup>–</sup> C<sub>25</sub>H<sub>42</sub>N<sub>4</sub>O<sub>19</sub> 702.2443, found 701.2352.

To a stirred solution of trisaccharide azide **29** (1.1 mg, 1.6  $\mu$ mol) in water (0.4 mL) was added a separately prepared solution of alkyne **25**<sup>67</sup> (3.1 mg, 5.3  $\mu$ mol) and *N,N*-diisopropylethylamine (1  $\mu$ L, 5.7  $\mu$ mol) in THF (0.4 mL). Additional THF (0.2 mL) was added followed by successive additions of copper (II) sulfate pentahydrate (13 mg, 52.0  $\mu$ mol; in 0.1 mL water) and L-ascorbic acid sodium salt (26 mg, 131.0  $\mu$ mol; in 0.1 mL water). The reaction mixture was shielded from light (aluminum foil) and stirred overnight. The reaction mixture was then transferred to another flask and concentrated under vacuum and a solution of CH<sub>2</sub>Cl<sub>2</sub>–CH<sub>3</sub>OH (1:1, 10 mL) was added. The sides of the flask were scraped well to ensure complete

dissolution of the product and filtered through a cotton plug. The filtrate was concentrated, and the residue was purified by size exclusion column chromatography (Sephadex-LH-20, CH<sub>2</sub>Cl<sub>2</sub>-CH<sub>3</sub>OH, 1:1) to afford **8** (0.7 mg, 35 %). *R<sub>f</sub>* 0.23, EtOAc-CH<sub>3</sub>OH-HOAc-H<sub>2</sub>O (36:9:9:6); <sup>1</sup>H NMR (700 MHz, CD<sub>3</sub>OD plus a few drops of CDCl<sub>3</sub>, δ<sub>H</sub>) 8.09 (s, 1H), 4.75 (s, 2H), 4.66-4.62 (m, 2H), 4.35 (d, 1H, *J* = 7.8 Hz, H-1), 4.31 (d, 1H, *J* = 7.7 Hz, H-1), 4.25-4.17 (m, 2H), 4.05-3.35 (m, 28H), 3.18 (dd, 2H, *J* = 0, 0 Hz), 2.90-2.80 (m, 1H), 2.10-2.05 (m, 2H), 2.0 (s, 3H, NHCOCH<sub>3</sub>), 1.70-1.45 (m, 6H), 1.40-1.16 (m, 56H), 0.86 (dd, 6H, *J* = 6.9 Hz); HRMS (ESI) calcd. for [M - H]<sup>-</sup> C<sub>63</sub>H<sub>116</sub>N<sub>4</sub>O<sub>22</sub> 1279.8008, found 1279.8018.

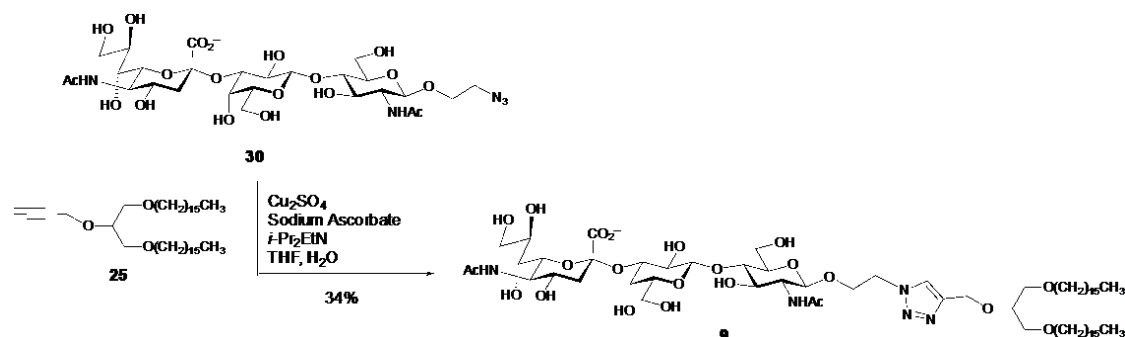

**Neoglycolipid 9.** This compound was prepared from trisaccharide azide **30**<sup>10</sup> (1.0 mg, 1.3  $\mu\text{mol}$ ), alkyne **25**<sup>67</sup> (3.2 mg, 5.5  $\mu\text{mol}$ ), *N,N*-diisopropylethylamine (1  $\mu\text{L}$ , 5.7  $\mu\text{mol}$ ), copper (II) sulfate pentahydrate (13 mg, 52.0  $\mu\text{mol}$ ; in 0.1 mL water) and L-ascorbic acid sodium salt (26 mg, 131.0  $\mu\text{mol}$ ; in 0.1 mL water) as described for the preparation of **8** to afford **9** (0.6 mg, 34 %).  $R_f$  0.25, EtOAc–CH<sub>3</sub>OH–HOAc–H<sub>2</sub>O (36:9:9:6); <sup>1</sup>H NMR (700 MHz, CD<sub>3</sub>OD plus a few drops of CDCl<sub>3</sub>,  $\delta_{\text{H}}$ ) 7.91 (s, 1H), 4.75 (s, 2H), 4.44 (d, 1H,  $J = 7.8$  Hz, H-1), 4.37 (d, 1H,  $J = 8.4$  Hz, H-1), 4.26–4.20 (m, 1H), 4.04 (dd, 1H,  $J = 3.0, 9.7$  Hz), 3.97–3.82 (m, 4H), 3.80–3.40 (m, 24H), 3.21 (ddd, 2H,  $J = 1.7, 3.3, 5.0$  Hz), 2.85 (dd, 1H,  $J = 12.2, 4.7$  Hz), 2.10–2.05 (m, 2H), 2.0 (s, 3H, NHCOCH<sub>3</sub>), 1.91 (s, 3H, NHCOCH<sub>3</sub>), 1.70–1.50 (m, 6H), 1.40–1.20 (m, 56H), 0.86 (dd, 6H,  $J = 6.9$  Hz); HRMS (ESI) calcd. for  $[\text{M} - \text{H}]^-$  C<sub>65</sub>H<sub>119</sub>N<sub>5</sub>O<sub>22</sub> 1320.8274, found 1320.8280.

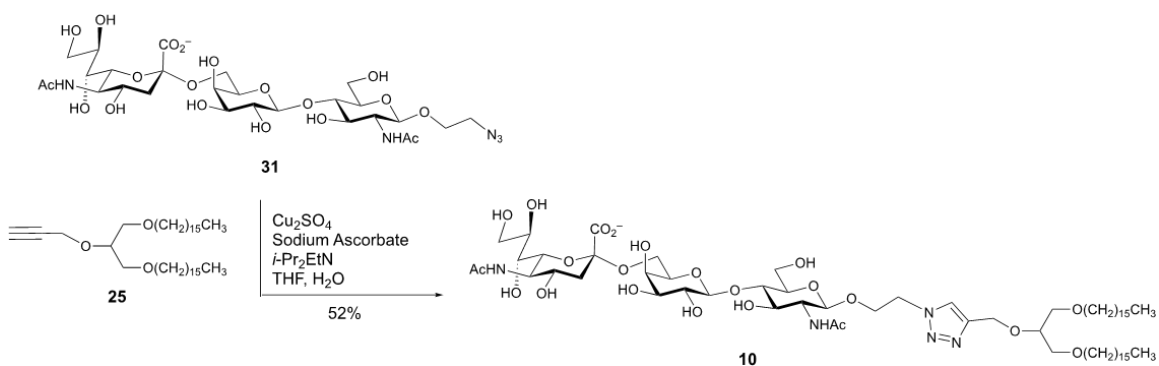

**Neoglycolipid 10**. This compound was prepared from trisaccharide azide **31**<sup>10</sup> (2.4 mg, 3.2  $\mu$ mol), alkyne **25**<sup>67</sup> (5.8 mg, 10.0  $\mu$ mol), *N,N*-diisopropylethylamine (3  $\mu$ L, 17.0  $\mu$ mol), copper (II) sulfate pentahydrate (21 mg, 84.0  $\mu$ mol; in 0.1 mL water) and L-ascorbic acid sodium salt (37 mg, 186.0  $\mu$ mol; in 0.1 mL water) as described for the preparation of **8** to afford **10** (2.2 mg, 52 %).  $R_f$  0.18, EtOAc–CH<sub>3</sub>OH–HOAc–H<sub>2</sub>O (36:9:9:6); <sup>1</sup>H NMR (700 MHz, CD<sub>3</sub>OD plus a few drops of CDCl<sub>3</sub>,  $\delta_H$ ) 7.95 (s, 1H), 4.75 (s, 2H), 4.63–4.55 (m, 2H), 4.56 (d, 1H,  $J$  = 8.4 Hz, H-1), 4.32 (d, 1H,  $J$  = 7.7 Hz, H-1), 4.26–4.20 (m, 1H), 4.03 (dd, 1H,  $J$  = 9.6, 9.6 Hz), 3.94–3.78 (m, 4H), 3.80–3.40 (m, 24H), 3.21 (ddd, 2H,  $J$  = 1.7, 3.3, 5.0 Hz), 2.78 (dd, 1H,  $J$  = 4.5, 12.1 Hz), 1.99 (s, 3H, NHCOCH<sub>3</sub>), 1.94 (s, 3H, NHCOCH<sub>3</sub>), 1.70–1.50 (m, 5H), 1.40–1.20 (m, 56H), 0.89 (dd, 6H,  $J$  = 6.9 Hz); HRMS (ESI) calcd. for [M – H]<sup>-</sup> C<sub>65</sub>H<sub>119</sub>N<sub>5</sub>O<sub>22</sub> 1320.8274, found 1320.8271.

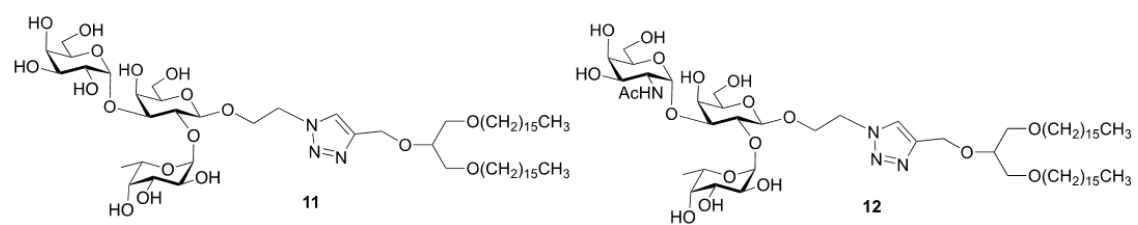

**Neoglycolipids 11 and 12**, which were prepared as described by Han et al..<sup>5</sup>



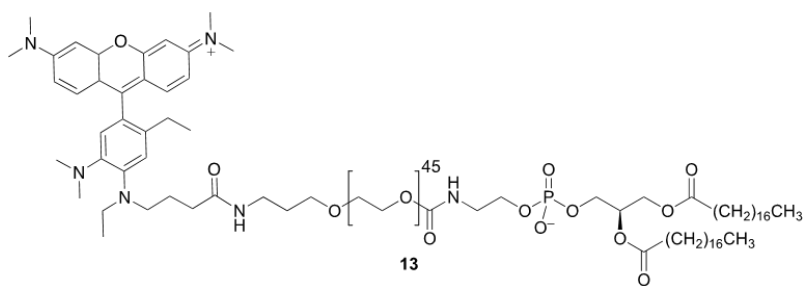

**pHrodo-PEG<sub>45</sub>-DSPE 13: 13** was prepared as described by Bhattacharjee et al.<sup>1</sup>

## Supplementary Tables

**Supplementary Table 1: Incorporation efficiency of ganglioside into liposome measure via mass spectrometry.**

| <b>Ganglioside</b> | <b>Expected mol%</b> | <b>Observed mol%</b> | <b>Incorporation Efficiency</b> |
|--------------------|----------------------|----------------------|---------------------------------|
| GM1                | 3.0 <sup>11</sup>    | 2.88 <sup>11</sup>   | 0.96 <sup>11</sup>              |
| GM2                | 3.0                  | 2.94                 | 0.98                            |
| GM3                | 3.0                  | 2.88                 | 0.96                            |

**Supplementary Table 2: Mutagenesis primers for the human Siglec family.**

| <b>Primer Name</b> | <b>Sequence</b>                              |
|--------------------|----------------------------------------------|
| Fwd Sig-1          | AGCAGCGCTAGCATGGGCTTCTTGCCCAAGCTTC           |
| Rvs Sig-1          | AGCAGCACCGGTTCAAGCCAGGGGTGGGGCAC             |
| Fwd Sig-1 R116A    | CTCTGGTTCCTACAACCTTCGCCTTCGAAATCAGTGAGGTC    |
| Rvs Sig-1 R116A    | GACCTCACTGATTTCTGAAGGCGAAGTTGTAGGAACCAGAG    |
| Fwd CD22           | AGCAGCGCTAGCATGCATCTCCTCGGCCCTGG             |
| Rvs CD22           | AGCAGCACCGGTTCAATGTTTGAGGATCACATAG           |
| Fwd CD22 R120A     | GTGGTCAGCTGGGGCTGGCGATGGAGTCCAAGACTGAG       |
| Rvs CD22 R120A     | CTCAGTCTTGGAAGTCCATCGCCAGCCCCAGCTGACCAC      |
| Fwd CD33           | AGCAGCGCTAGCATGCCGCTGCTGCTACTGCTG            |
| Rvs CD33           | AGCAGCACCGGTTCACTGGGTCCTGACCTCTG             |
| Fwd CD33 R119A     | GATAATGGTTCATACTTCTTTGCGATGGAGAGAGGAAGTACC   |
| Rvs CD33 R119A     | GGTACTTCTCTCTCCATCGCAAAGAAGTATGAACCATTATC    |
| Fwd Sig-4          | AGCAGCGCTAGCATGATATTCCTCACGGCACTG            |
| Rvs Sig-4          | AGCAGCACCGGTTCAAGTGAAGTCCAGGGTAG             |
| Fwd Sig-4 R118A    | GGCGGGAAGTACTACTTCGCTGGGGACCTGGGCGGCTAC      |
| Rvs Sig-4 R118A    | GTAGCCGCCAGGTCCAGCGAAGTAGTACTTCCCGCC         |
| Fwd Sig-5          | AGCAGCGCTAGCATGCTGCCCCTGCTGCTGCTG            |
| Rvs Sig-5          | AGCAGCACCGGTTCACTTGTCTTGTCTGATCTC            |
| Fwd Sig-5 R119A    | CACGGGAAGCTATTTCTTCGCCGTGGAGAGAGGAAGGGATG    |
| Rvs Sig-5 R119A    | CATCCCTTCTCTCTCCACGGCGAAGAAATAGCTTCCCGTG     |
| Fwd Sig-6          | AGCAGCGCTAGCATGCAGGGAGCCCAGGAAGCC            |
| Rvs Sig-6          | AGCAGCACCGGTTCACTTGTGTATCTTGATTTC            |
| Fwd Sig-6 R122A    | CAATGCTGCATACTTCTTTGCGTTGAAGTCCAAATGGATG     |
| Rvs Sig-6 R122A    | CATCCATTTGGACTTCAACGCAAAGAAGTATGCAGCATTG     |
| Fwd Sig-7          | AGCAGCGCTAGCATGCTGCTGCTGCTGCTGCTG            |
| Rvs Sig-7          | AGCAGCACCGGTTTACTTGGGGATCTTGATCTC            |
| Fwd Sig-7 R124A    | GAGATACTTCTTTGCAATGGAGAAAGGAATATAAAATG       |
| Rvs Sig-7 R124A    | CATTTTATATTTCTTTCTCCATTGCAAAGAAGTATCTC       |
| Fwd Sig-8          | AGCAGCGCTAGCATGCTGCTGCTGCTGCTGCTG            |
| Rvs Sig-8          | AGCAGCACCGGTTCAAGCCTCTGACTTCTTTGC            |
| Fwd Sig-8 R125A    | GATAAGGGGTCATATTTCTTTGCACTAGAGAGAGGAAG       |
| Rvs Sig-8 R125A    | CTTCTCTCTCTAGTGCAAAGAATATGACCCCTTATC         |
| Fwd Sig-9          | AGCAGCGCTAGCATGCTGCTGCTGCTGCTGCCC            |
| Rvs Sig-9          | AGCAGCACCGGTTCACTGTGGATCTTGATCTC             |
| Fwd Sig-9 R120A    | GCGGGGAGATACTTCTTTGCTATGGAGAAAGGAAGTATAAAATG |
| Rvs Sig-9 R120A    | CATTTTATACTTCTTTCTCCATAGCAAAGAAGTATCTCCCCGC  |
| Fwd Sig-10         | AGCAGCGCTAGCATGCTACTGCCACTGCTGCTG            |
| Rvs Sig-10         | AGCAGCACCGGTTCAATTGGAAGTACTTCTGCTG           |
| Fwd Sig-10 R119A   | GAGTCACAGTACTTCTTTGCGGTGGAGAGAGGAAGCTATG     |
| Rvs Sig-10 R119A   | CATAGCTTCTCTCTCCACCGCAAAGAAGTACTGTGACTC      |
| Fwd Sig-11         | AGCAGCGCTAGCATGCTGCTGCTGCCCCTGCTG            |
| Rvs Sig-11         | AGCAGCACCGGTTCACTTTGGAACCATCCCTG             |
| Fwd Sig-11 R120A   | GAGGCATGGTACTTCTTTGCGGTGGAGAGAGGAAGCCGTG     |
| Rvs Sig-11 R120A   | CACGGCTTCTCTCTCCACCGCAAAGAAGTACCATGCCTC      |
| Fwd Sig-15         | AGCAGCGCTAGCATGGAAAAGTCCATCTGGCTG            |
| Rvs Sig-15         | AGCAGCACCGGTTCAAGGTGAGCACATGGTGGC            |
| Fwd Sig-15 R143A   | GACCGCCGCTACTTCTGCGCCGTCGAGTTCGCCGGCGAC      |
| Rvs Sig-11 R143A   | GTCCGCGCGAAGTCCAGCGCGCAGAAGTAGCGGCGGTC       |
| Fwd Sig-11 K274A   | GCTCTCGGCTTCAAGGCGCTGCTGCTGCTG               |
| Rvs Sig-15 K274A   | GAGCAGCAGCAGCGCTGCGAAGCCGAGAGC               |

**Supplementary Table 3: Additional Siglec-6 mutagenesis primers.**

| <b>Primer Name</b> | <b>Sequence</b>                       |
|--------------------|---------------------------------------|
| Fwd Sig-6          | AGCAGCGCTAGCATGCAGGGAGCCCAGGAAGCC     |
| Rvs Sig-6          | AGCAGCACCGGTTCACTTGTGTATCTTGATTC      |
| Fwd C46A           | CAGGAGGGTCTGGCCGTCCTCGTACCCTG         |
| Rvs C46A           | CAGGGTACGAGGACGGCCAGACCCTCCTG         |
| Fwd E87A           | CGA AGA AGT GCA GGC GGA GAC CCG GG    |
| Rvs E87A           | CCC GGG TCT CCG CCT GCA CTT CTT CG    |
| Fwd E88A           | GAA GTG CAG GAG GCG ACC CGG GGC CG    |
| Rvs E88A           | CGG CCC CGG GTC GCC TCC TGC ACT TC    |
| Fwd R90A           | GGAGGAGACCGCGGGCCGATTCCA              |
| Rvs R90A           | GAATCGGCCCCGCGGTCTCCTCCTG             |
| Fwd R92A           | CCCGGGGCGCTTTCCACCTCCTCTG             |
| Rvs R92A           | CCAGAGGAGGTGGAAGCGCCCCGGGTC           |
| Fwd R92K           | GACCCGGGGCAAATTCCACCTCCTC             |
| Rvs R92K           | GAGGAGGTGGAATTTGCCCGGGTC              |
| Fwd F93A           | CCC GGG GCC GAG CCC ACC TCC TC        |
| Rvs F93A           | GAG GAG GTG GGC TCG GCC CCG GG        |
| Fwd L95A           | CGG GGC CGA TTC CAC GCC CTC TGG GAT   |
| Rvs L95A           | ATC CCA GAG GGC GTG GAA TCG GCC CCG   |
| Fwd R100A          | CTCTGGGATCCCGCAAGGAAGAAGTCTC          |
| Rvs R100A          | GAGCAGTTCTTCCCTTGCGGGATCCCAGAG        |
| Fwd R101A          | CTCTGGGATCCCAGAGCGAAGAAGTCTC          |
| Rvs R101A          | GAGCAGTTCTTCCGCTCTGGGATCCCAGAG        |
| Fwd R109A          | CCTGAGCATCGCGGATGCCCGGAG              |
| Rvs R109A          | TCCGGGCATCGCGGATGCTCAGG               |
| Fwd R112A          | CAGAGATGCCGCCAGGAGGGACAATGC           |
| Rvs R112A          | GCATTGTCCCTCCTGGCGGCATCTCTG           |
| Fwd R113A          | CAGAGATGCCCGGGCGAGGGACAATGC           |
| Rvs R113A          | GCATTGTCCCTCGCCCGGGCATCTCTG           |
| Fwd R114A          | GAGATGCCCGGAGGGCGGACAATGCTG           |
| Rvs R114A          | CAGCATTGTCCGCCCTCCGGGCATCTC           |
| Fwd R147A          | CCCTGACCCACGCGCCCAACATCTCC            |
| Rvs R147A          | GGAGATGTTGGGCGCGTGGGTCAGGG            |
| Fwd C172A          | GCCCTGGGTCGCTGAGCAGGGGAC              |
| Rvs C172A          | GTCCCCTGCTCAGCGACCCAGGGC              |
| Fwd E173A          | CCC TGG GTC TGT GCG CAG GGG ACG       |
| Fwd E173A          | CGT CCC CTG CGC ACA GAC CCA GGG       |
| Fwd Q174A          | GGG TCT GTG AGG CGG GGA CGC CCC C     |
| Rvs Q174A          | GGG GGC GTC CCC GCC TCA CAG ACC C     |
| Fwd G175M          | CTG TGA GCA GAT GAC GCC CCC CAT CTT C |
| Rvs G175M          | GAA GAT GGG GGG CGT CAT CTG CTC ACA G |

**Supplementary Table 4: Lipids used in liposome formulations and their respective supplier.**

| <b>Lipid</b>          | <b>Source</b>          | <b>Supplier</b>    |
|-----------------------|------------------------|--------------------|
| Cholesterol           | NA                     | Sigma              |
| 20:0 DAPC             | NA                     | Avanti             |
| 18:1-18:1 DOPC        | NA                     | Avanti             |
| 18:0-18:1 SOPC        | NA                     | Avanti             |
| 18:0 DSPC             | NA                     | Avanti             |
| 16:0 DPPC             | NA                     | Avanti             |
| 14:0 DMPC             | NA                     | Avanti             |
| 12:0 DLPC             | NA                     | Avanti             |
| 18:0 PEG (2000) PE    | NA                     | Avanti             |
| DSPE-PEG (2000) Amine | NA                     | Avanti             |
| GM1                   | Porcine Brain          | TRB Chemedica Inc. |
| GM2                   | Bovine, Semi-synthetic | Matreya            |
| GM3                   | Bovine Milk            | Sigma              |
| GM4                   | Chicken Egg            | Matreya            |
| GD1a                  | Bovine, Natural        | Matreya            |
| GD1b                  | Bovine, Natural        | Matreya            |
| GD3                   | Bovine Buttermilk      | Matreya            |
| GT1b                  | Bovine, Natural        | Matreya            |
| GQ1b                  | Porcine, Natural       | Matreya            |

**Supplementary Table 5: Liposome size as a function of formulation.**

| <b>Formulation Parameter</b>      | <b>PEG<sub>45</sub>-DSPE</b> | <b>Cholesterol (mol%)</b> | <b>GM1 (Porcine Brain)</b> | <b>Bulk Lipid</b> | <b>Bulk Lipid Description</b> | <b>Av. Size (d) nm</b> | <b>PDI</b> |
|-----------------------------------|------------------------------|---------------------------|----------------------------|-------------------|-------------------------------|------------------------|------------|
| PEG <sub>45</sub> -DSPE Titration | 0.5                          | 38                        | 0                          | 61.5              | DSPC                          | 119 ± 3                | 0.197      |
|                                   | 0.5                          | 38                        | 3                          | 58.5              | DSPC                          | 129 ± 3                | 0.241      |
|                                   | 5                            | 38                        | 0                          | 57                | DSPC                          | 140 ± 4                | 0.290      |
|                                   | 5                            | 38                        | 3                          | 54                | DSPC                          | 141 ± 11               | 0.146      |
| GM1 Titration                     | 0.5                          | 38                        | 0                          | 61.5              | DSPC                          | 148 ± 1                | 0.246      |
|                                   | 0.5                          | 38                        | 3                          | 58.5              | DSPC                          | 124 ± 2                | 0.229      |
|                                   | 0.5                          | 38                        | 10                         | 51.5              | DSPC                          | 124 ± 3                | 0.130      |
|                                   | 0.5                          | 38                        | 20                         | 41.5              | DSPC                          | 125 ± 1                | 0.167      |
| Cholesterol Titration             | 0.5                          | 38                        | 3                          | 58.5              | DSPC                          | 126 ± 1                | 0.122      |
|                                   | 0.5                          | 28                        | 3                          | 68.5              | DSPC                          | 163 ± 3                | 0.260      |
|                                   | 0.5                          | 18                        | 3                          | 78.5              | DSPC                          | 148 ± 1                | 0.104      |
|                                   | 0.5                          | 8                         | 3                          | 88.5              | DSPC                          | 160 ± 1                | 0.232      |
| Bulk Lipid Acyl Chain Length      | 0.5                          | 38                        | 3                          | 58.5              | DLPC                          | 110 ± 2                | 0.223      |
|                                   | 0.5                          | 38                        | 3                          | 58.5              | DMPC                          | 122 ± 3                | 0.299      |
|                                   | 0.5                          | 38                        | 3                          | 58.5              | DPPC                          | 125 ± 1                | 0.094      |
|                                   | 0.5                          | 38                        | 3                          | 58.5              | DSPC                          | 136 ± 1                | 0.147      |
|                                   | 0.5                          | 38                        | 3                          | 58.5              | DAPC                          | 141 ± 1                | 0.093      |
| Bulk Lipid Acyl Chain Symmetry    | 0.5                          | 38                        | 3                          | 58.5              | DSPC                          | 136 ± 3                | 0.145      |
|                                   | 0.5                          | 38                        | 3                          | 58.5              | SOPC                          | 124 ± 10               | 0.122      |
|                                   | 0.5                          | 38                        | 3                          | 58.5              | DOPC                          | 125 ± 2                | 0.109      |
|                                   | 0.5                          | 38                        | 3                          | 58.5              | POPC                          | 136 ± 3                | 0.135      |
|                                   | 0.5                          | 38                        | 3                          | 58.5              | PSPC                          | 137 ± 1                | 0.192      |

**Supplementary Table 6: List of antibodies used in this study.**

| <b>Antibody</b>      | <b>Supplier</b> | <b>Cat. No.</b> | <b>Label</b>     | <b>Clone</b> | <b>Isotype</b> | <b>Dilution</b> |
|----------------------|-----------------|-----------------|------------------|--------------|----------------|-----------------|
| anti-human CD169     | Biologend       | 346003          | PE               | 7-239        | Mouse IgG1, κ  | 1/250 (V/V)     |
| anti-human CD22      | Biologend       | 302406          | PE               | HIB22        | Mouse IgG1, κ  | 1/250 (V/V)     |
| anti-human CD33      | Biologend       | 983904          | PE               | WM53         | Mouse IgG1, κ  | 1/250 (V/V)     |
| anti-MAG             | Santa Cruz      | sc-166849       | PE               | A-11         | Mouse IgG2a, κ | 1/250 (V/V)     |
| anti-human Siglec-5  | Biologend       | 452003          | PE               | 1A5          | Mouse IgG1, κ  | 1/250 (V/V)     |
| anti-Siglec-6        | R&D Systems     | FAB2859T        | PE               | 767329       | Mouse IgG2A    | 1/250 (V/V)     |
| anti-Siglec-6        | R&D Systems     | MAB2859         | Unlabeled        | 767329       | Mouse IgG2A    | 1/250 (V/V)     |
| anti-Siglec-6        | R&D Systems     | FAB2859G        | AF488            | 767329       | Mouse IgG2A    | 1/250 (V/V)     |
| anti-Siglec-6        | R&D Systems     | FAB2859T        | AF594            | 767329       | Mouse IgG2A    | 1/250 (V/V)     |
| anti-human CD328     | Biologend       | 339203          | PE               | 6-434        | Mouse IgG1, κ  | 1/250 (V/V)     |
| anti-human Siglec-8  | Biologend       | 347103          | PE               | 7C9          | Mouse IgG1, κ  | 1/250 (V/V)     |
| anti-human Siglec-9  | Biologend       | 351503          | PE               | K8           | Mouse IgG1, κ  | 1/250 (V/V)     |
| anti-human Siglec-10 | Biologend       | 347603          | PE               | 5G6          | Mouse IgG1, κ  | 1/250 (V/V)     |
| anti-Siglec-11       | Biologend       | 681702          | Unlabeled        | 4C4          | Mouse IgG2b    | 1/250 (V/V)     |
| anti-Siglec-15       | Non-commercial  |                 | Unlabeled        | -            | Mouse IgG1     | 1/250 (V/V)     |
| anti-mouse IgG1      | Biologend       | 406607          | PE               | RMG1-1       | Rat IgG        | 1/250 (V/V)     |
| anti-mouse IgG2b     | Biologend       | 406707          | PE               | RMG2b-1      | Rat IgG, κ     | 1/250 (V/V)     |
| anti-mouse IgG       | Thermofischer   | A-21208         | AF594            | Polyclonal   | Donkey, IgG    | 1/250 (V/V)     |
| anti-CD19            | Biologend       | 302219          | AF488            | HIB19        | Mouse IgG1, κ  | 1/100 (V/V)     |
| anti-CD3             | Biologend       | 317321          | BV605            | UCHT1        | Mouse IgG1, κ  | 1/100 (V/V)     |
| anti-CD27            | Biologend       | 356437          | PE/Cyanine7      | M-T271       | Mouse IgG1, κ  | 1/100 (V/V)     |
| anti-IgD             | Biologend       | 348207          | PerCP/Cyanine5.5 | IA6-2        | Mouse IgG1, κ  | 1/100 (V/V)     |
| anti-CD38            | Biologend       | 356619          | BV650            | HB-7         | Mouse IgG1, κ  | 1/100 (V/V)     |
| anti-CD22            | Biologend       | 302523          | BV421            | S-HCL-1      | Mouse IgG2b, κ | 1/100 (V/V)     |
| anti-CD117 (c-Kit)   | Biologend       | 332203          | PE               | S18022G      | Mouse IgG2a, κ | 1/100 (V/V)     |

|               |           |         |              |        |                |             |
|---------------|-----------|---------|--------------|--------|----------------|-------------|
| anti-FcεR1α   | Biolegend | 334623  | BV421        | AER-37 | Mouse IgG2b, κ | 1/100 (V/V) |
| anti-CD34     | Biolegend | 343527  | BV510        | 581    | Mouse IgG1, κ  | 1/100 (V/V) |
| anti-CD19     | Biolegend | 302217  | APC/Cyanine7 | SJ25C1 | Mouse IgG1, κ  | 1/100 (V/V) |
| anti-CD14     | Biolegend | 301833  | BV605        | M5E2   | Mouse IgG2a, κ | 1/100 (V/V) |
| anti-CD3      | Biolegend | 317323  | BV650        | OKT3   | Mouse IgG2a, κ | 1/100 (V/V) |
| anti-Siglec-8 | Biolegend | 347111a | PE/Cyanine7  | 7C9    | Mouse IgG1, κ  | 1/100 (V/V) |

---



**Supplementary Table 7: Primers used to make Siglec-6/8 chimeras.**

| <b>Primer Name</b>         | <b>Sequence</b>                    |
|----------------------------|------------------------------------|
| Fwd Sig-6                  | AGCAGCGCTAGCATGCAGGGAGCCCAGGAAGCC  |
| Rvs Sig-6                  | AGCAGCACCGGTTCACTTGTGTATCTTGATTTTC |
| Fwd Sig-8                  | AGCAGCGCTAGCATGCTGCTGCTGCTGCTGCTG  |
| Rvs Sig-8                  | AGCAGCACCGGTTCAGCCTCTGACTTCTTTGC   |
| Fwd Sig-6 D <sub>1,2</sub> | GTGATGGCCCTGACCCATAGGCC            |
| Rvs Sig-6 D <sub>1,2</sub> | GGGCCTATGGGTCAGGGCCATCAC           |
| Fwd Sig-6 D <sub>2,3</sub> | CCATCCAGCTCAATGTGTCCTATGCTCCACAG   |
| Rvs Sig-6 D <sub>2,3</sub> | CTCTGGAGAATAGGAATTGAGCTGGATGG      |

## Supplementary Figures

**a**

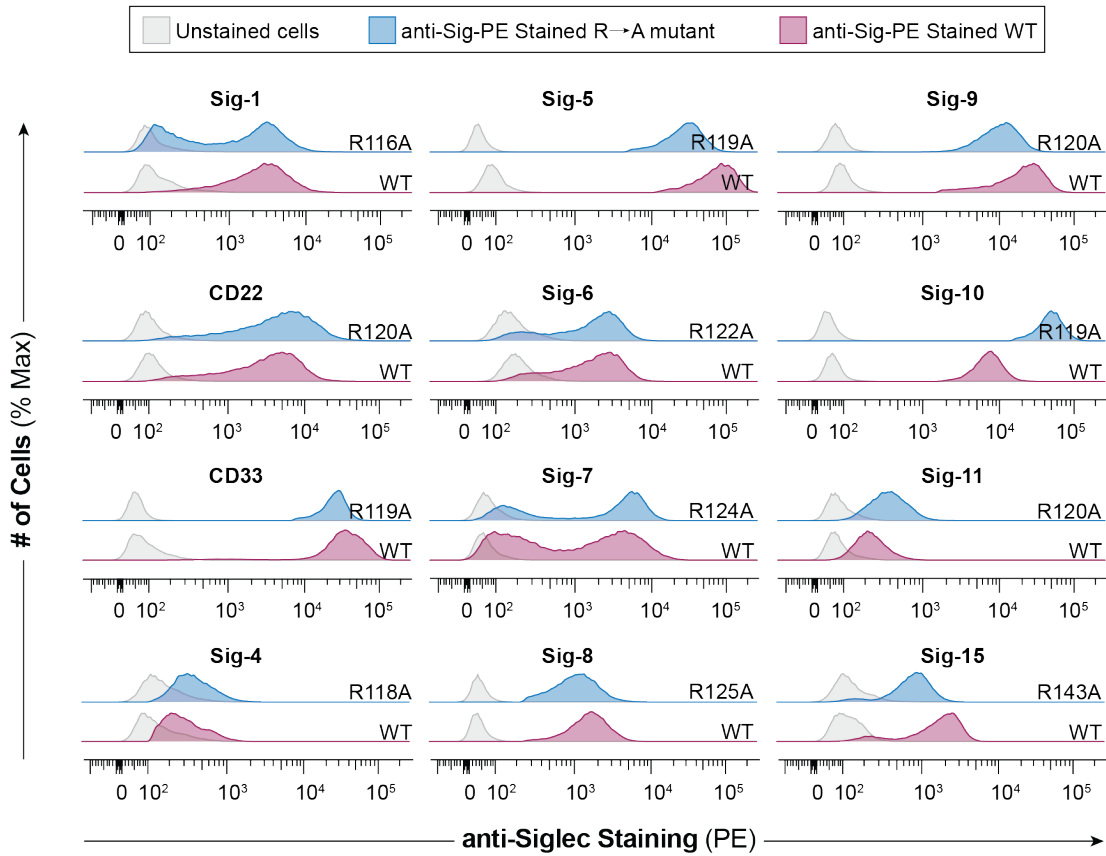

**b**

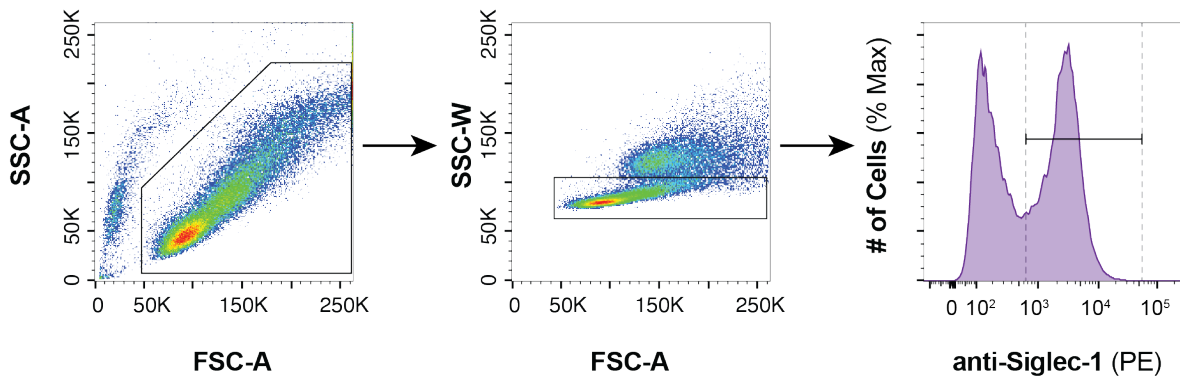

**Supplementary Fig. 1: anti-Siglec-PE antibody staining, and gating strategy of CHO cell lines engineered to express each human Siglec and each corresponding arginine mutant. a,** anti-Siglec-PE staining of CHO cell lines expressing each human Siglec and respective canonical arginine mutant. **b,** General gating strategy used in liposome binding experiments to isolated Siglec positive CHO cells to which liposome binding was measured.

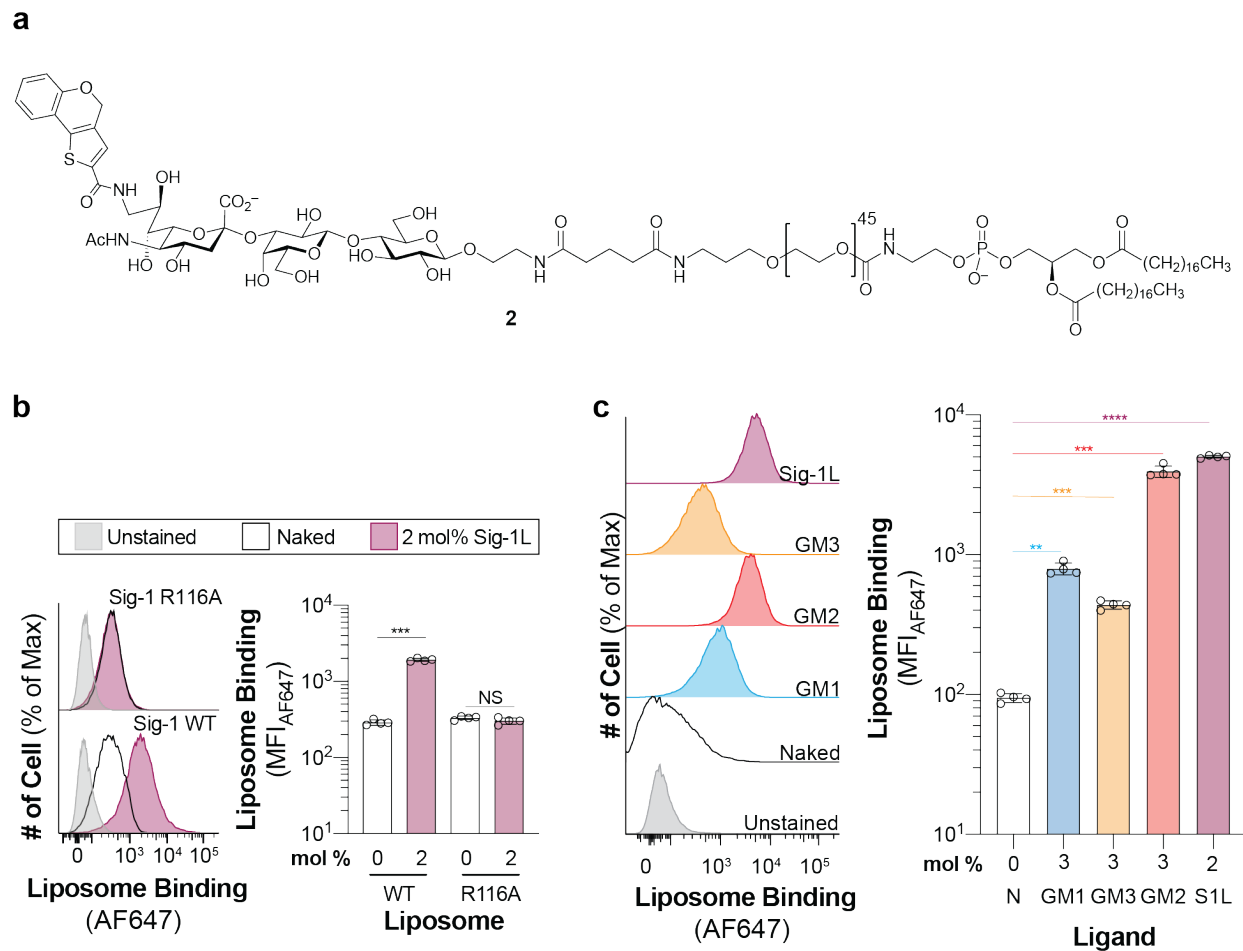

**Supplementary Fig. 2: Liposomes formulated with a high affinity Siglec-1 ligand appended to PEG<sub>45</sub>-DSPE engages WT Siglec-1 expressing CHO cells.** **a**, Chemical structure of high affinity Siglec-1 ligand appended to PEG<sub>45</sub>-DSPE (**2**). **b**, Binding of liposomes formulated with 2 mol% **2** to CHO cells expressing WT and R116A Siglec-1 (n=4 technical replicates). **c**, Binding of GLLs formulated with **2** compared to GLs formulated with GM1, GM2 and GM3 (n=4 technical replicates). Data is presented with a representative flow cytometry histogram and was quantified as the mean  $\pm$  one standard deviation of the median fluorescent intensity (MFI) from four technical replicates. For panels **b** and **c**, a Brown-Forsythe and Welch one-way ANOVA was used for statistical analysis. Not Significant (NS);  $P > 0.5$ ; \*\* =  $0.01 > P \geq 0.001$ ; \*\*\* =  $0.001 > P \geq 0.0001$ ; \*\*\*\* =  $P < 0.0001$ .

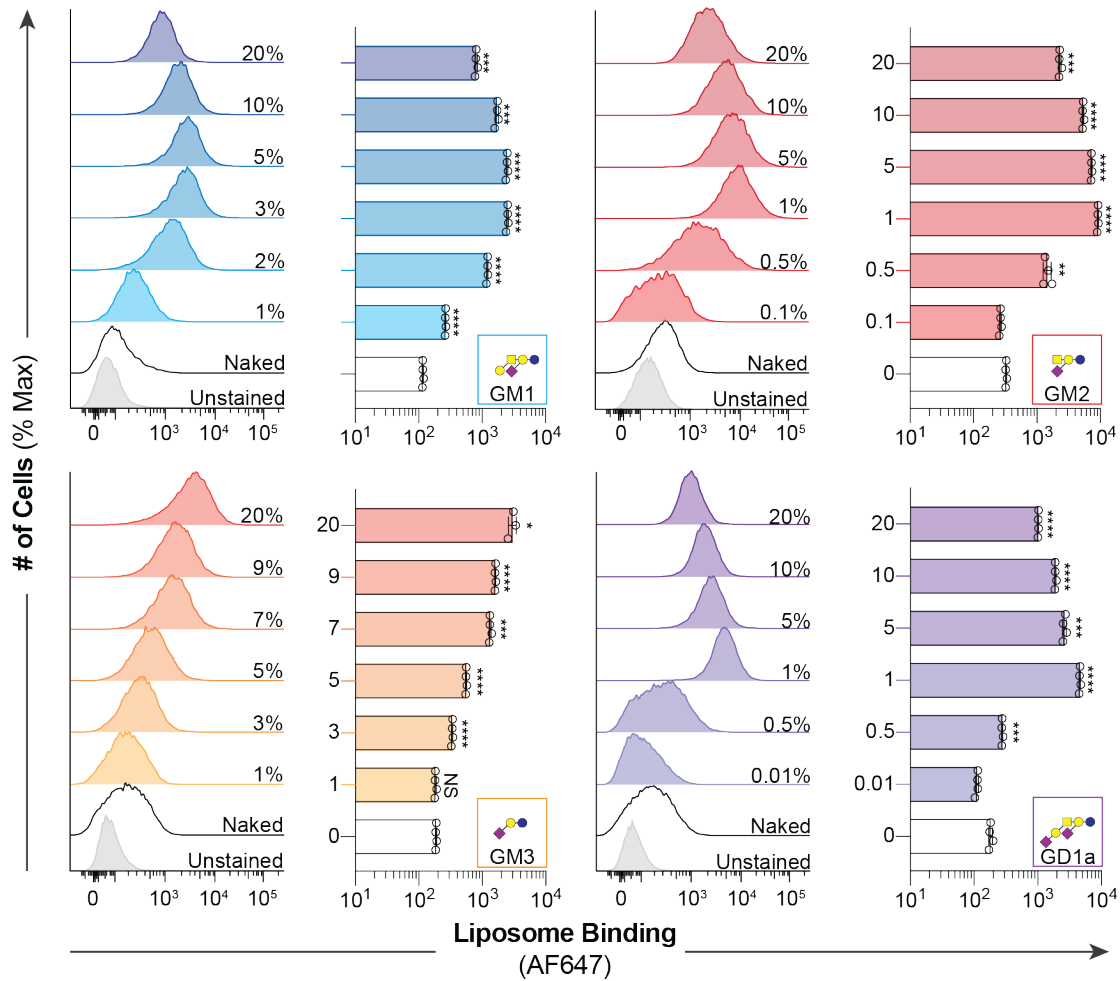

**Supplementary Fig. 3: Binding of liposomes formulated with increasing ganglioside content to CHO cells expressing Siglec-1.** Data is presented with a representative flow cytometry histogram and was quantified as the mean  $\pm$  one standard deviation of the median fluorescent intensity (MFI) from at least three technical replicates (GM1, n=4 technical replicates; GM2, n=4 technical replicates; GM3, 4  $\geq$  3; GD1a, n=4 technical replicates). A Brown-Forsythe and Welch one-way ANOVA was used to compare if liposomes formulated with increasing amounts of ganglioside were significantly higher than a naked liposome. Not Significant (NS); P > 0.5; \* = 0.05 > P  $\geq$  0.01; \*\* = 0.01 > P  $\geq$  0.001; \*\*\* = 0.001 > P  $\geq$  0.0001; \*\*\*\* = P < 0.0001.

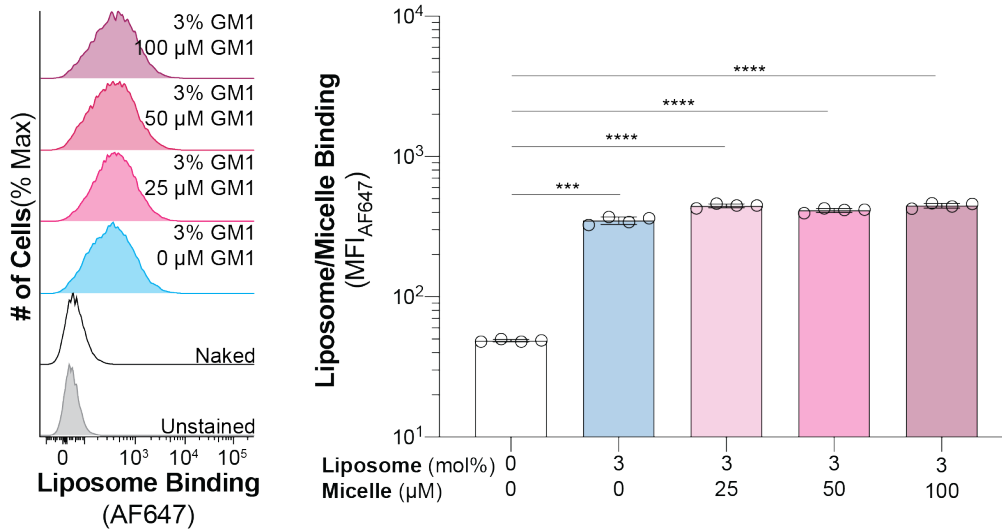

#### GM1 Amount

**Supplementary Fig. 4: Binding of GM1 liposomes in the presence of micellar GM1 to Siglec-1 expressing CHO cells.** Competition between GM1 micelles and GM1 liposomes to Siglec-1 expressing CHO cells. Data is presented with a representative flow cytometry histogram and was quantified as the mean  $\pm$  one standard deviation of the median MFI from four technical replicates. A Brown-Forsythe and Welch one-way ANOVA was used to compare the binding between GM1 liposomes in the presence of GM1 micelles to naked liposomes. \*\*\* =  $0.001 > P \geq 0.0001$ ; \*\*\*\* =  $P < 0.0001$ .

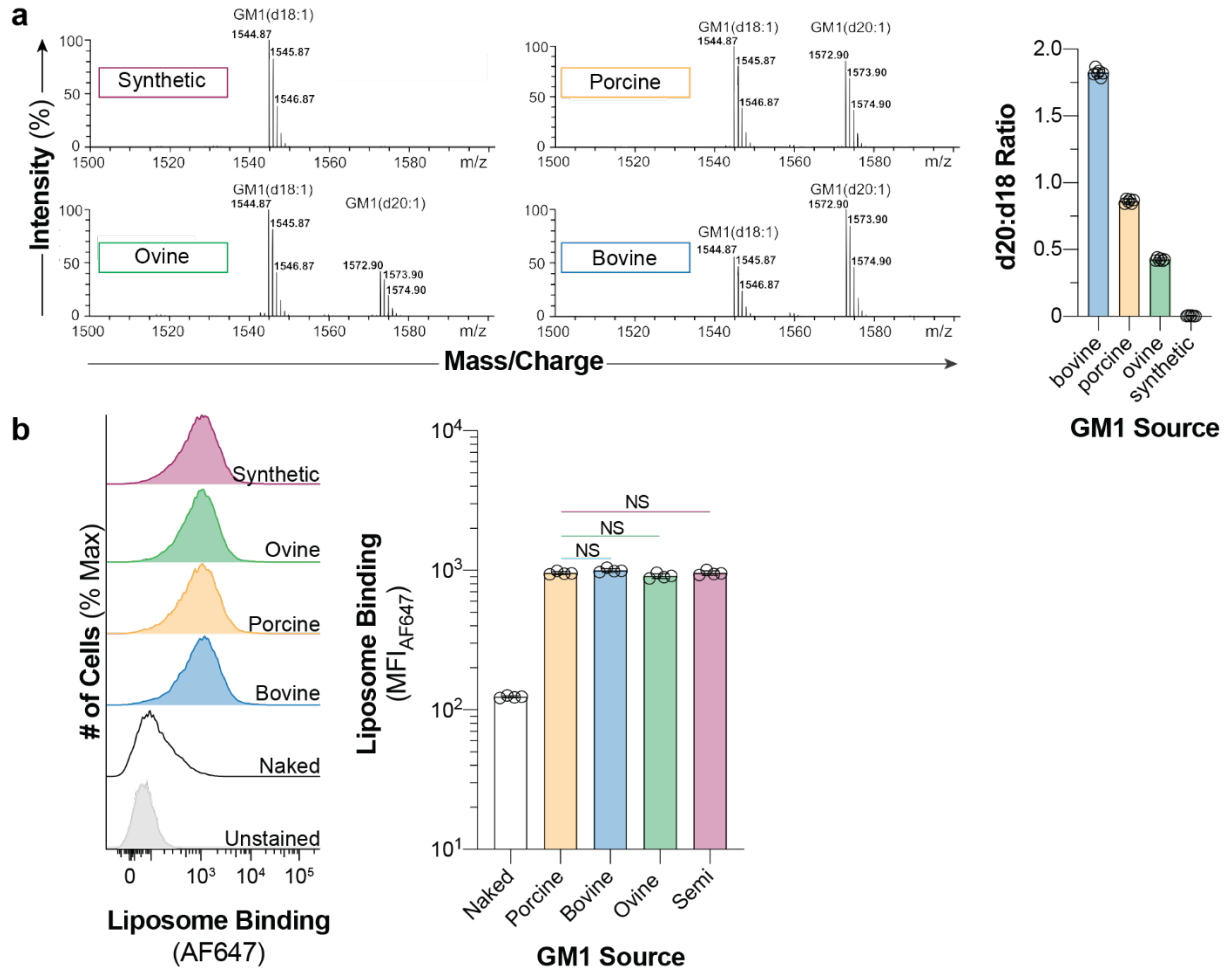

**Supplementary Fig. 5: Binding of liposomes formulated with GM1 isolated from different sources to CHO cells expressing Siglec-1.** **a**, Mass spectra of ganglioside GM1 isolated from different sources. Results are quantified as the mean of six technical replicates  $\pm$  one standard deviation. **b**, Liposome binding of 3 mol% GM1 liposomes formulated with GM1 from different sources to Siglec-1 expressing CHO cells. Flow cytometry data is presented with a representative flow cytometry histogram and was quantified as the mean  $\pm$  one standard deviation of the median fluorescent intensity (MFI) from four technical replicates. For panel **b**, a Brown-Forsythe and Welch one-way ANOVA was used for statistical analysis to compare liposomes formulated with GM1 from porcine brain (initial formulation parameter) to liposomes with GM1 from different sources. Not Significant (NS).

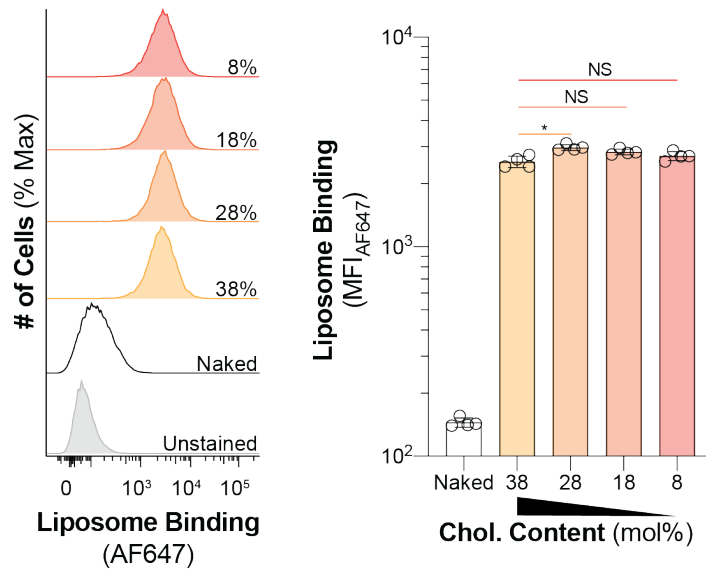

**Supplementary Fig. 6: Binding of liposomes formulated with decreasing amounts of cholesterol to CHO cells expressing Siglec-1.** Binding of liposome formulated with 3 mol% GM1 and varying amounts (38-8 mol%) of cholesterol to Siglec-1 expressing CHO cells. Data is presented with a representative flow cytometry histogram and was quantified as the mean  $\pm$  one standard deviation of the median fluorescent intensity (MFI) from four technical replicates. A Brown-Forsythe and Welch one-way ANOVA was used for statistical analysis to compare the difference in liposome binding between 38 mol% (initial formulation parameter) to binding with the other amounts of cholesterol. Not Significant (NS);  $P > 0.5$ ; \* =  $0.05 > P \geq 0.01$ .

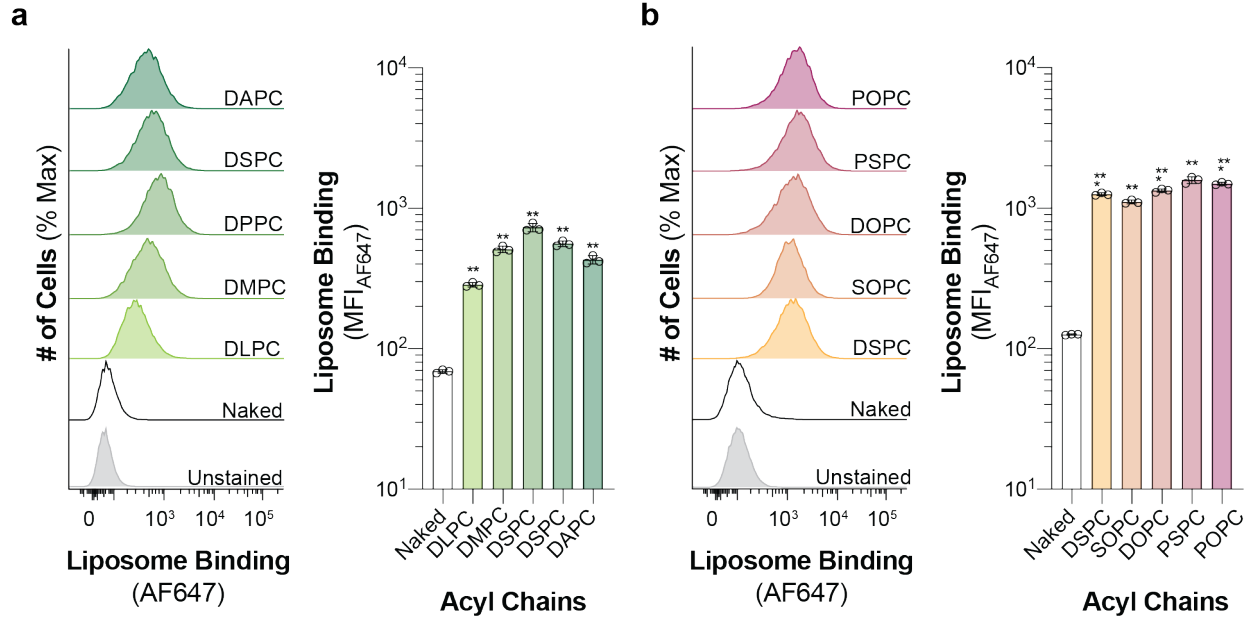

**Supplementary Fig. 7: Binding of GM1 liposomes formulated with bulk lipids varying with respect to acyl chain length, symmetry, and degree of saturation to CHO cells expressing Siglec-1. a,** Binding of 3 mol% GM1 liposomes formulated with bulk lipids with varying acyl chain lengths to Siglec-1 expressing CHO cells. **b,** Binding of 3 mol% GM1 liposomes formulated with bulk lipids with asymmetric and unsaturated acyl chains to Siglec-1 expressing CHO cells. Data is presented with a representative flow cytometry histogram and was quantified as the mean  $\pm$  one standard deviation of the median fluorescent intensity (MFI) from three technical replicates. For panels **a** and **b**, a Brown-Forsythe and Welch one-way ANOVA was used to compare the binding of liposomes formulated with the various bulk lipids to that of the naked liposomes. \*\* =  $0.01 > P \geq 0.001$ ; \*\*\* =  $0.001 > P \geq 0.0001$ .



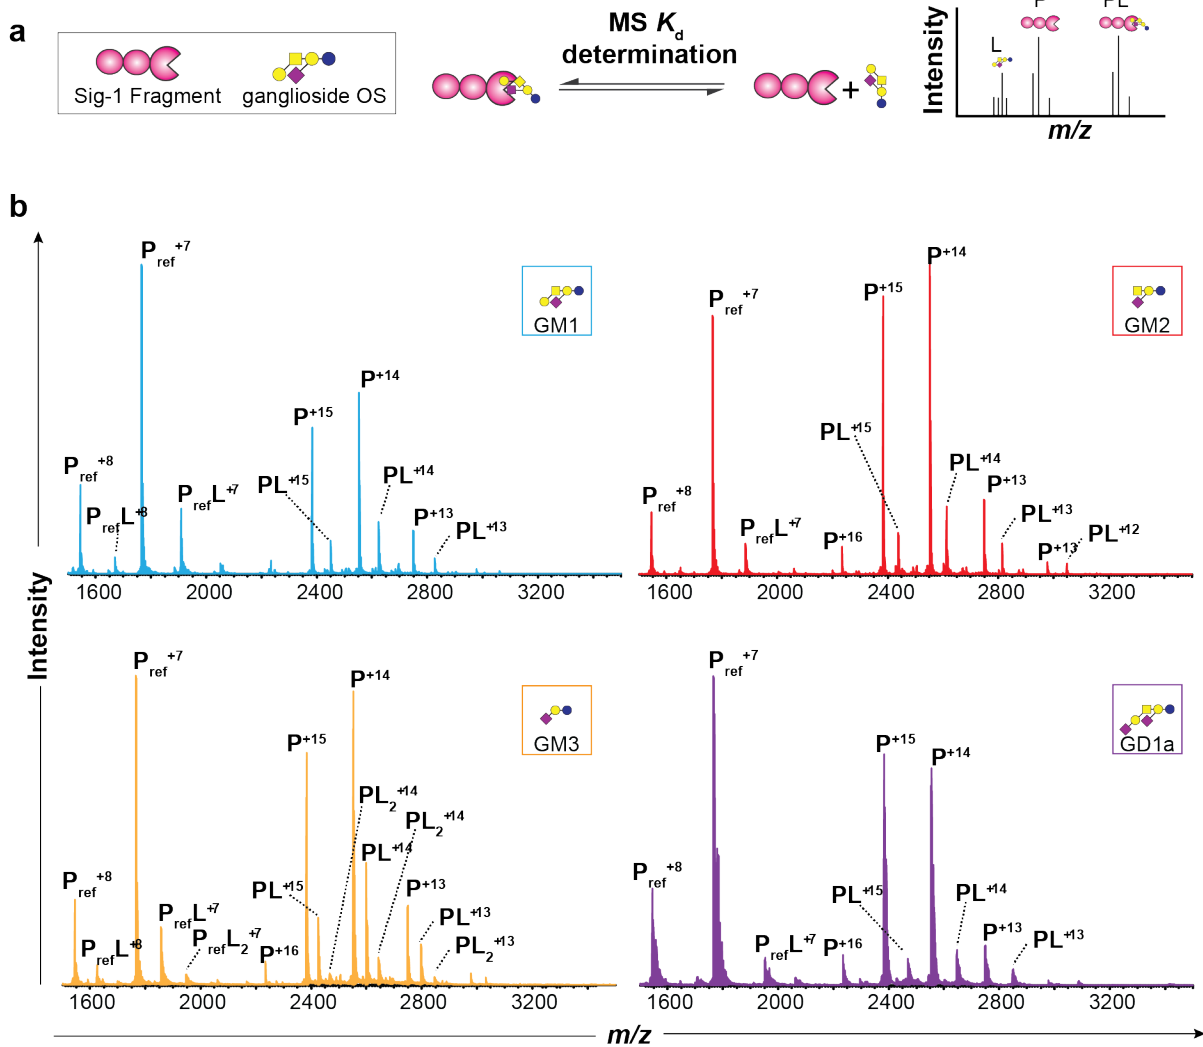

**Supplementary Fig. 8: Determination of dissociation constants ( $K_d$ ) between a soluble Siglec-1 fragment and the oligosaccharide of GM1, GM2, GM3, and GD1a. a, Schematic representation of the assay used to determine the  $K_d$  between Siglec-1 and the ganglioside oligosaccharide (P-protein, L-ligand, PL-protein ligand complex). b, Mass spectra of the soluble Siglec-1 fragment and respective ganglioside oligosaccharides. The dissociation constants were measured at a protein concentration of 3.6  $\mu\text{M}$  and ganglioside oligosaccharides were titrated from 20  $\mu\text{M}$  to 140  $\mu\text{M}$ . Dissociation constants were calculated using equations (1) and (2).**

**a**

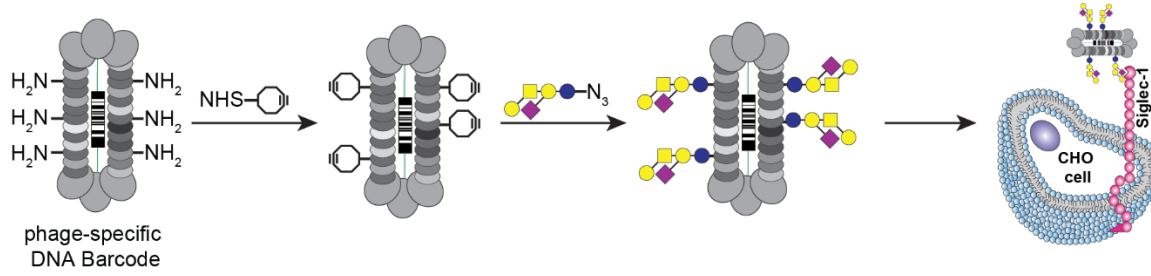

**b**

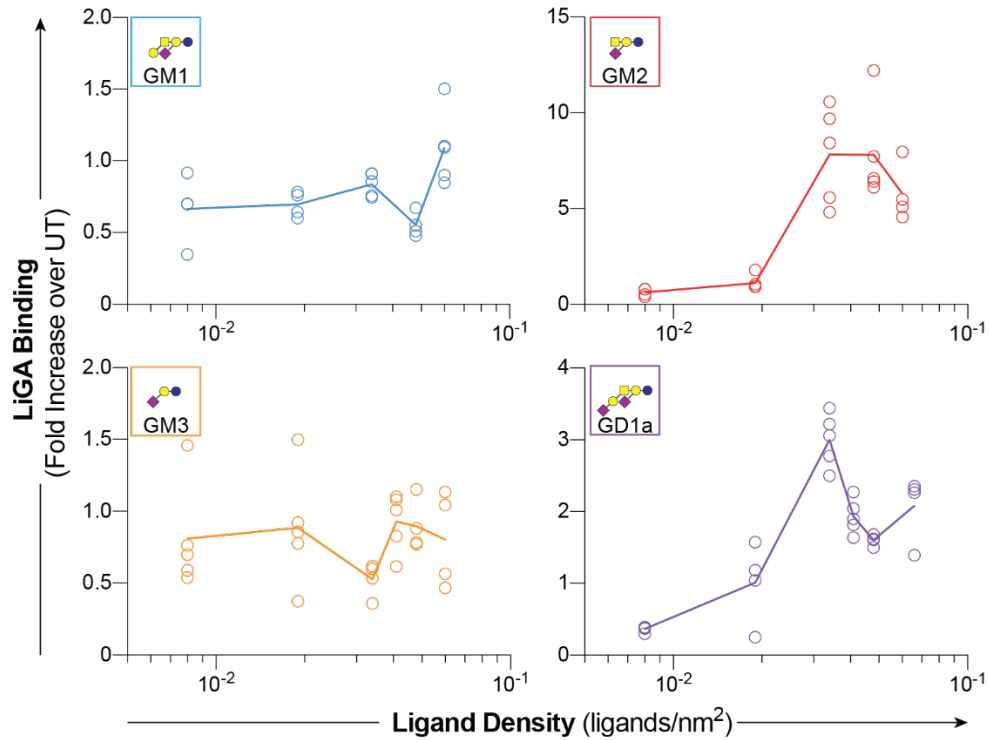

**Supplementary Fig. 9: Titration of ganglioside oligosaccharide density on phage against Siglec-1 expressing CHO cells.** **a**, Schematic representation of phage labelling with azide functionalized ganglioside oligosaccharides. **b**, Phage labeled with the varying densities of the oligosaccharide of GM1, GM2, GM3 and GD1a binding to CHO cells expressing Siglec-1. Binding was quantified by Next-generation sequencing and is represented by at least four technical replicates ( $5 \geq n \geq 4$ )

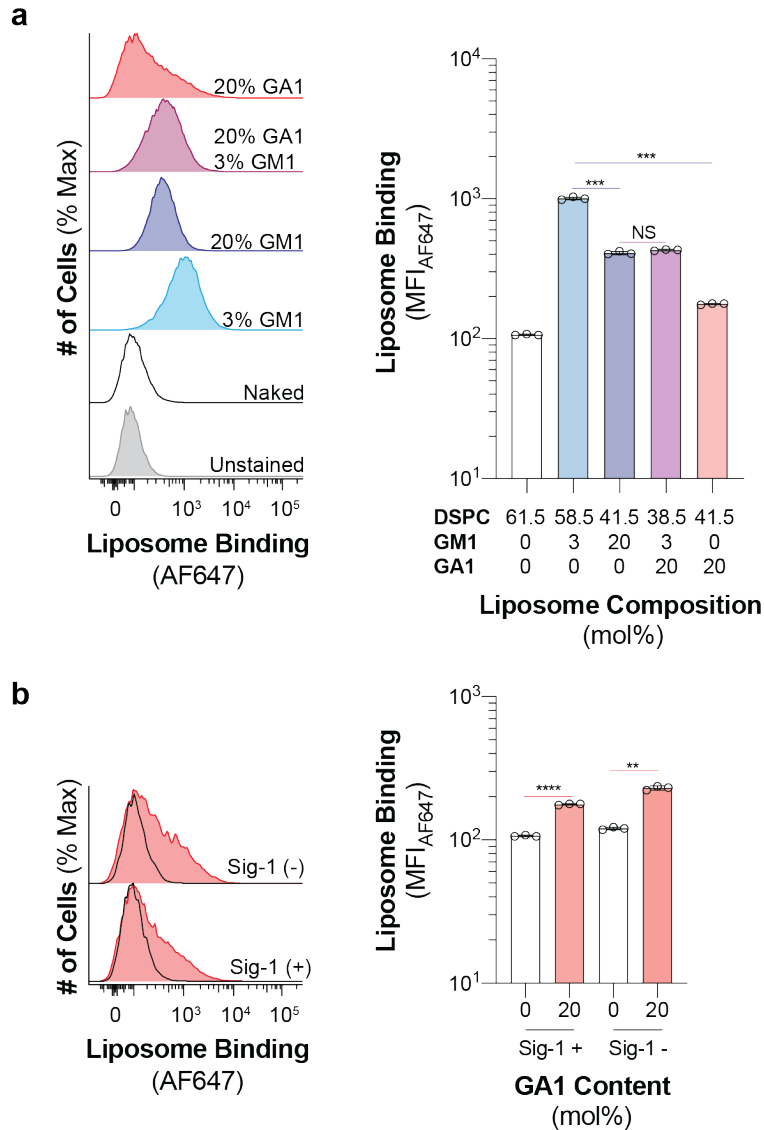

**Supplementary Fig. 10: Binding of liposomes formulated with asialo-GM1 (GA1) and GM1 to CHO cells expressing Siglec-1. a**, Binding of GM1 liposomes formulated with and without GA1 to Siglec-1 expressing CHO cells. **b**, Binding of 20 mol % GA1 liposomes to Siglec-1 positive and negative CHO cells. Flow cytometry data is presented with a representative flow cytometry histogram and was quantified as the mean  $\pm$  one standard deviation of the median fluorescent intensity (MFI) from three technical replicates. For panels **a** and **b**, a Brown-Forsythe and Welch one-way ANOVA was used for statistical analysis. For panel **a**, statistical analysis was used to compare the effect of adding GA1 to 3 mol% GM1 liposomes on their ability to bind to Siglec-1 expressing CHO cells. For panel **b**, statistical analysis was used to determine if the minimal binding of the GA1 liposomes to the CHO cells was dependent of Siglec-1. Not Significant (NS); \*\* = 0.01 > P  $\geq$  0.001; \*\*\* = 0.001 > P  $\geq$  0.0001; \*\*\*\* = P < 0.0001.

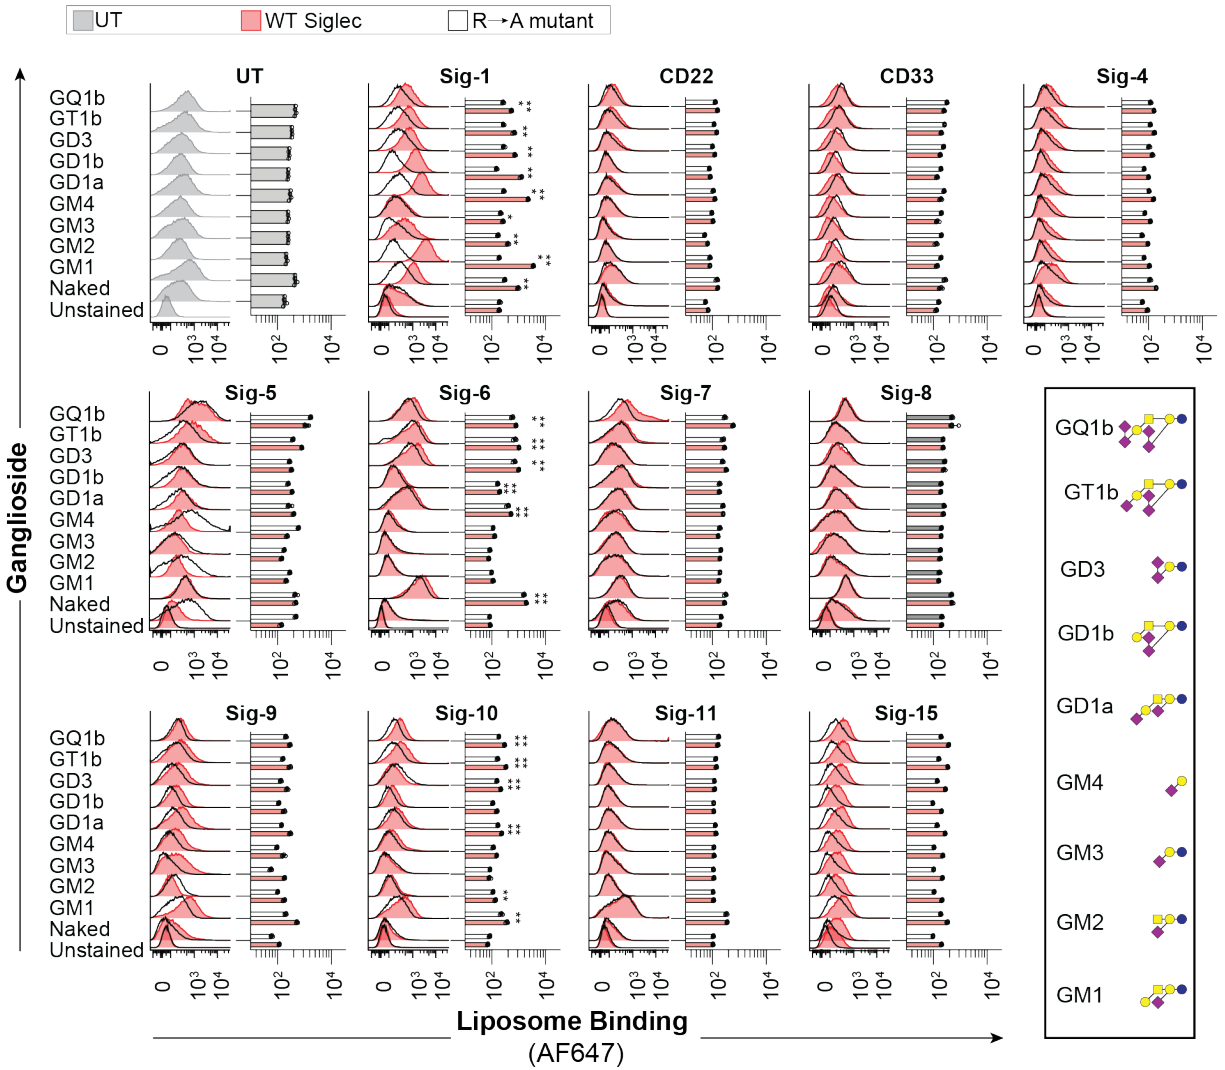

**Supplementary Fig. 11: Interrogation of the human Siglec family against nine commercially available gangliosides using our optimized liposome formulation.** UT-grey, WT (red), Mutant (black). Data is presented with a representative flow cytometry histogram and was quantified as the mean  $\pm$  one standard deviation of the median fluorescent intensity (MFI) from at least three technical replicates ( $4 \geq n \geq 3$ ). A Brown-Forsythe and Welch one-way ANOVA was used to determine if the binding of liposome formulated with a ganglioside was significantly higher than a naked liposome to CHO cells expressing WT Siglec. Not Significant (NS);  $P > 0.5$ ; \* =  $0.05 > P \geq 0.01$ ; \*\* =  $0.01 > P \geq 0.001$ ; \*\*\* =  $0.001 > P \geq 0.0001$ ; \*\*\*\* =  $P < 0.0001$ ..

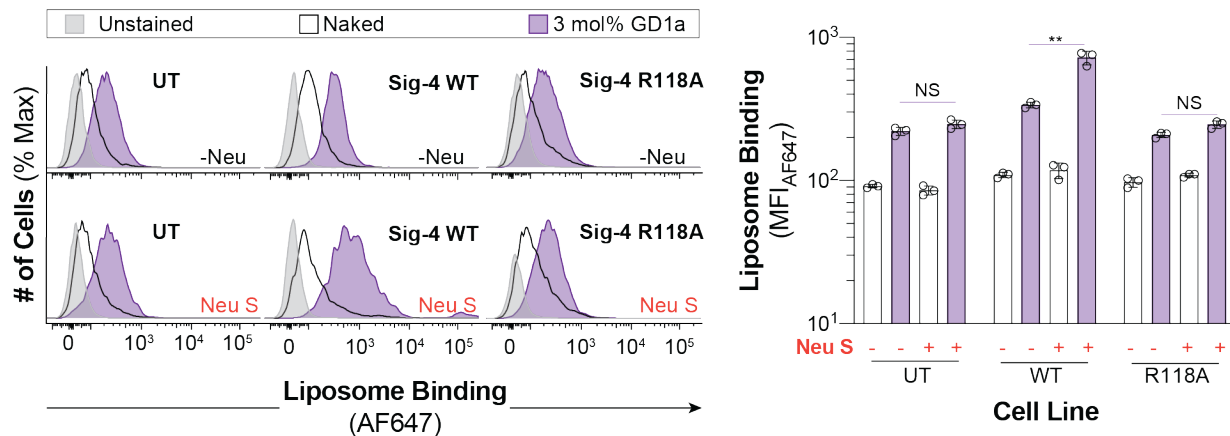

**Supplementary Fig. 12: GLL binding to CHO cells expressing Siglec-4 in the absence of serum and after treatment with neuraminidase.** 3 mol% GD1a GLLs binding to Siglec-4 expressing CHO cells when measured in the absence of serum glycoproteins as well as treatment with neuraminidase S. Flow cytometry data is presented with a representative flow cytometry histogram and was quantified as the mean  $\pm$  one standard deviation of the median fluorescent intensity (MFI) from three technical replicates. A Brown-Forsythe and Welch one-way ANOVA was used for statistical analysis to compare the binding of 3 mol% GD1a liposome to cells before and after treatment with neuraminidase S. Not Significant (NS); \*\* = 0.01 > P  $\geq$  0.001.

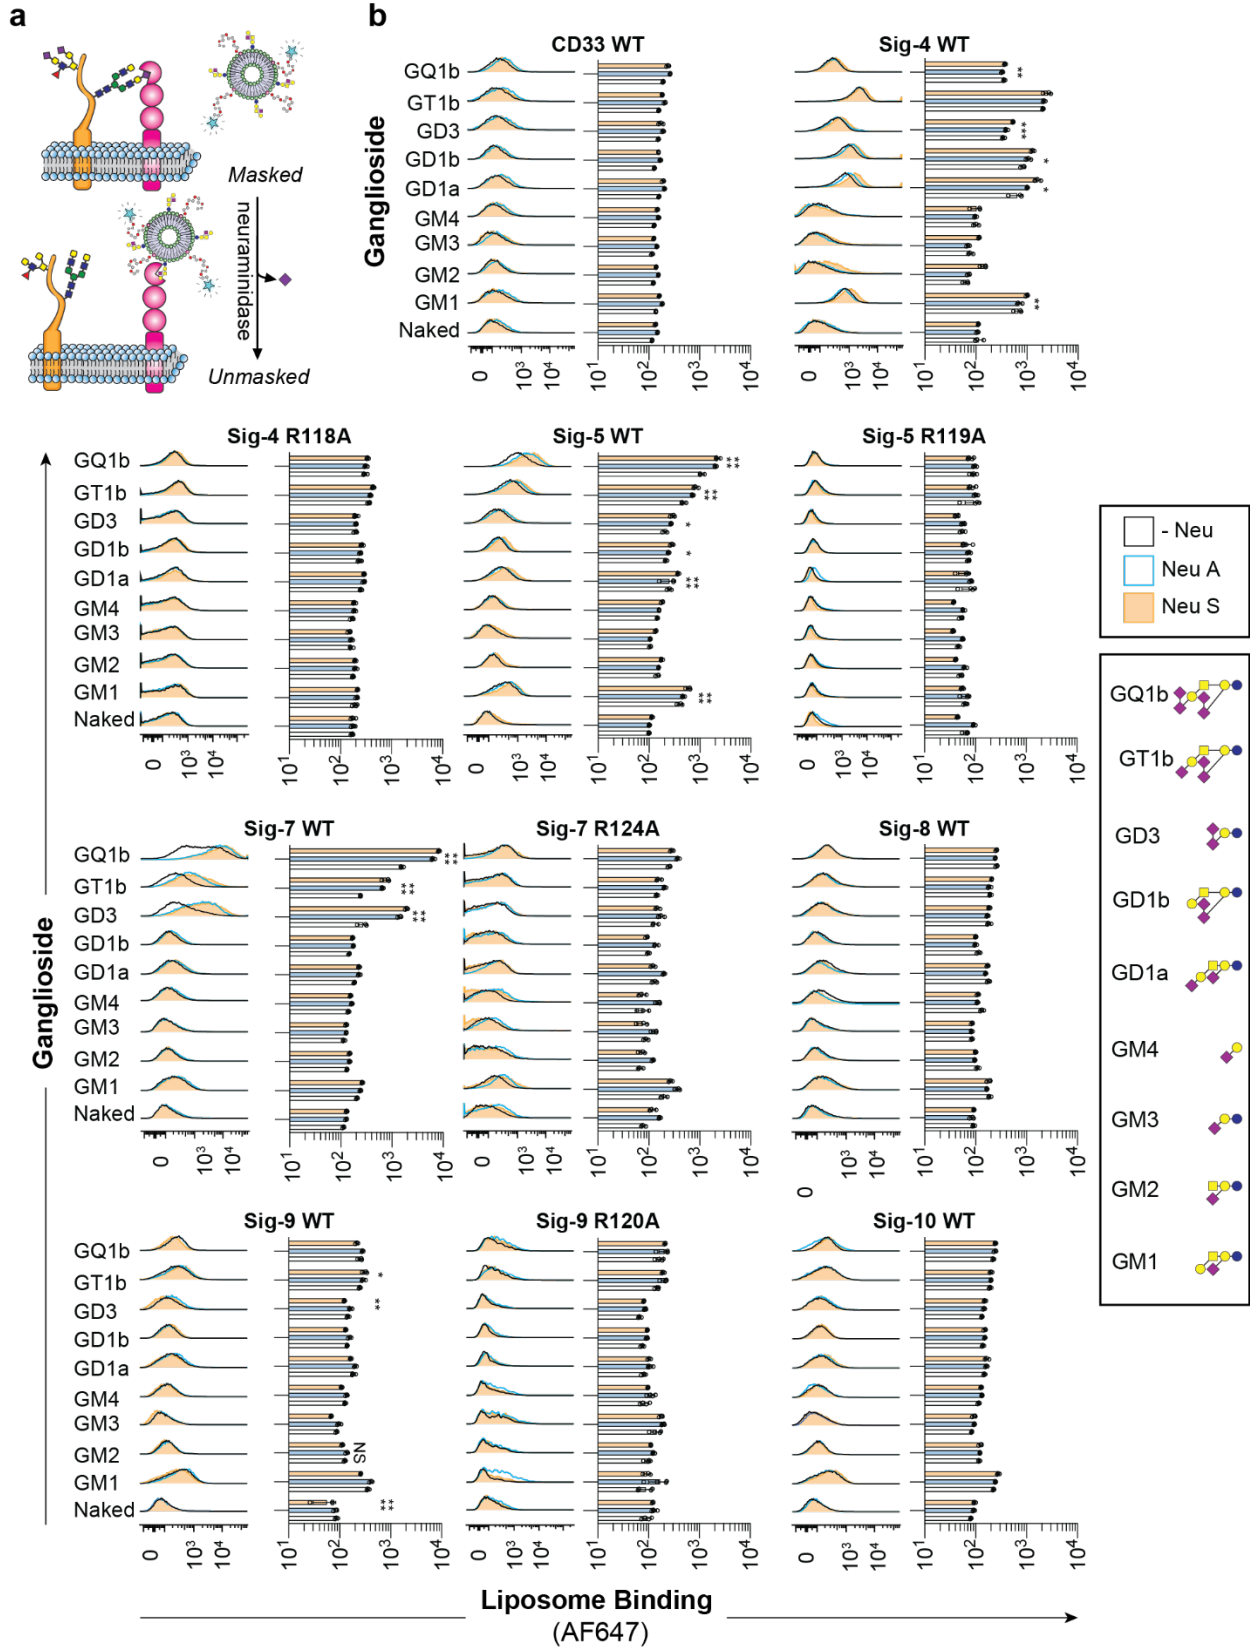

**Supplementary Fig. 13: Glycolipid liposome binding improves to many Siglecs when *cis* interactions are reduced by neuraminidase treatment.** **a**, Schematic representation of the effect of neuraminidase treatment of cells on liposome binding. **b**, Binding of liposome formulated with the nine commercially available gangliosides in our optimized liposome formulation to CHO cells expressing select human Siglecs after treatment with neuraminidase A (blue) and neuraminidase S (orange). Data is presented with a representative flow cytometry histogram and was quantified as the mean  $\pm$  one standard deviation of the median fluorescent intensity (MFI) from at least three technical replicates ( $n \geq 3$ ). A Brown-Forsythe and Welch one-way ANOVA was used to determine if the binding of liposome formulated with a ganglioside was significantly higher than a naked liposome after treatment with neuraminidase S. Not Significant (NS);  $P > 0.5$ ; \* =  $0.05 > P \geq 0.01$ ; \*\* =  $0.01 > P \geq 0.001$ ; \*\*\* =  $0.001 > P \geq 0.0001$ ; \*\*\*\* =  $P < 0.0001$ .

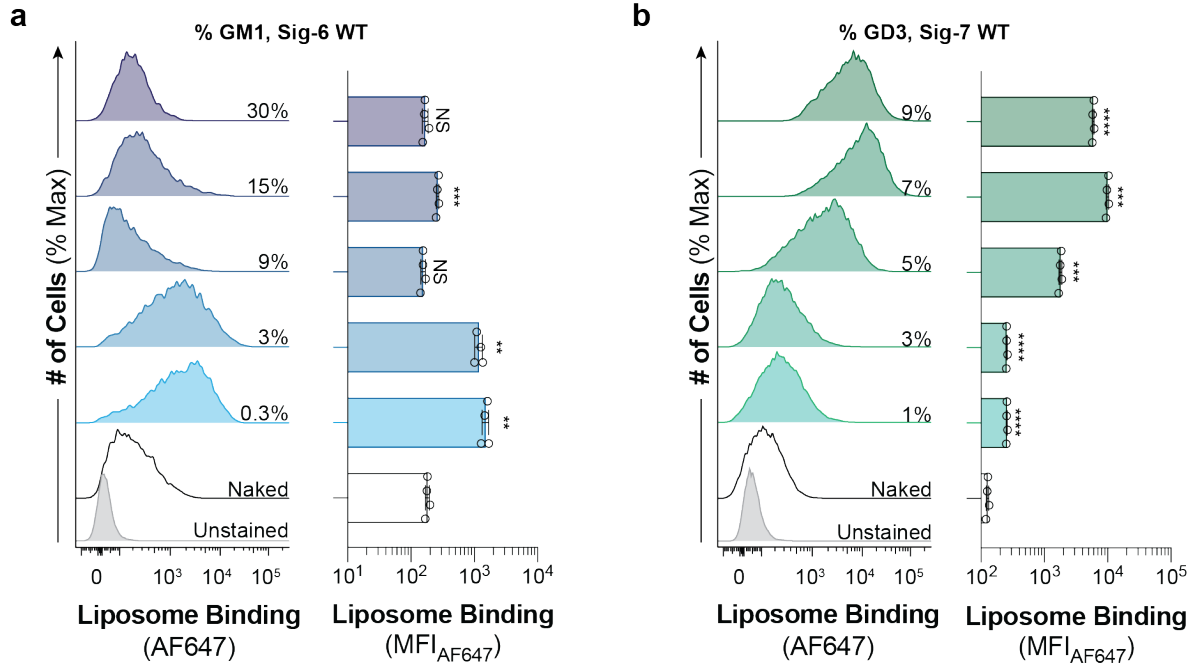

**Supplementary Fig. 14: Poor binding of GLL with high ganglioside content to Siglec-6 and Siglec-7.** **a, b** Binding Liposomes formulated with Increasing amounts of GM1 and GD3 to Siglec-6 and Siglec-7 expressing CHO cells respectively. For panel **b**, Siglec-7 CHO cells were treated with neuraminidase S before liposome binding. Data is presented with a representative flow cytometry histogram and was quantified as the mean  $\pm$  one standard deviation of the median fluorescent intensity (MFI) from four technical replicates. For panels **a** and **b**, a Brown-Forsythe and Welch one-way ANOVA was used to compare if liposomes formulated with increasing amounts of ganglioside were significantly higher than a naked liposome. Not Significant (NS);  $P > 0.5$ ; \*\* =  $0.01 > P \geq 0.001$ ; \*\*\* =  $0.001 > P \geq 0.0001$ ; \*\*\*\* =  $P < 0.0001$ .



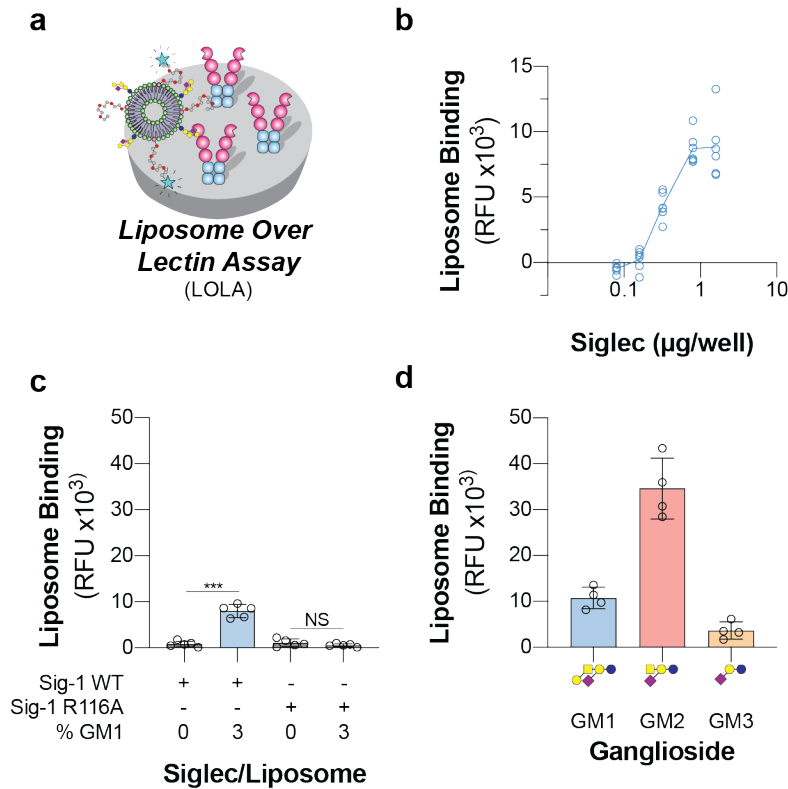

**Supplementary Fig. 15: Development of Liposome Over Lectin Assay (LOLA) with Siglec-1.** **a**, Schematic representation of the LOLA (n=5 technical replicates). **b**, Influence of the amount of soluble Siglec-Fc adsorbed to the microplate on binding of 3 mol% GM1 liposomes by WT Siglec-1. **b**, Binding of 3 mol% GM1 liposomes to Siglec-1 WT and R116A mutant (n=5 technical replicates). **c**, Binding of 3 mol% GM1, GM2, and GM3 liposomes to WT Siglec-1. **d**, Liposomes formulated with GM1, GM2 and GM3 binding to WT Siglec-1 in the LOLA (n=4 technical replicates). Data is presented as the mean  $\pm$  one standard deviation of the background corrected relative fluorescence units (RFU) from at least four technical replicates. For panel **c**, a Brown-Forsythe and Welch one-way ANOVA was used to compare 3 mol% GM1 liposome binding to naked liposome binding to WT and R116A Siglec-1 adsorbed to the microplate. Not Significant (NS); \*\*\* = 0.001 > P  $\geq$  0.0001.

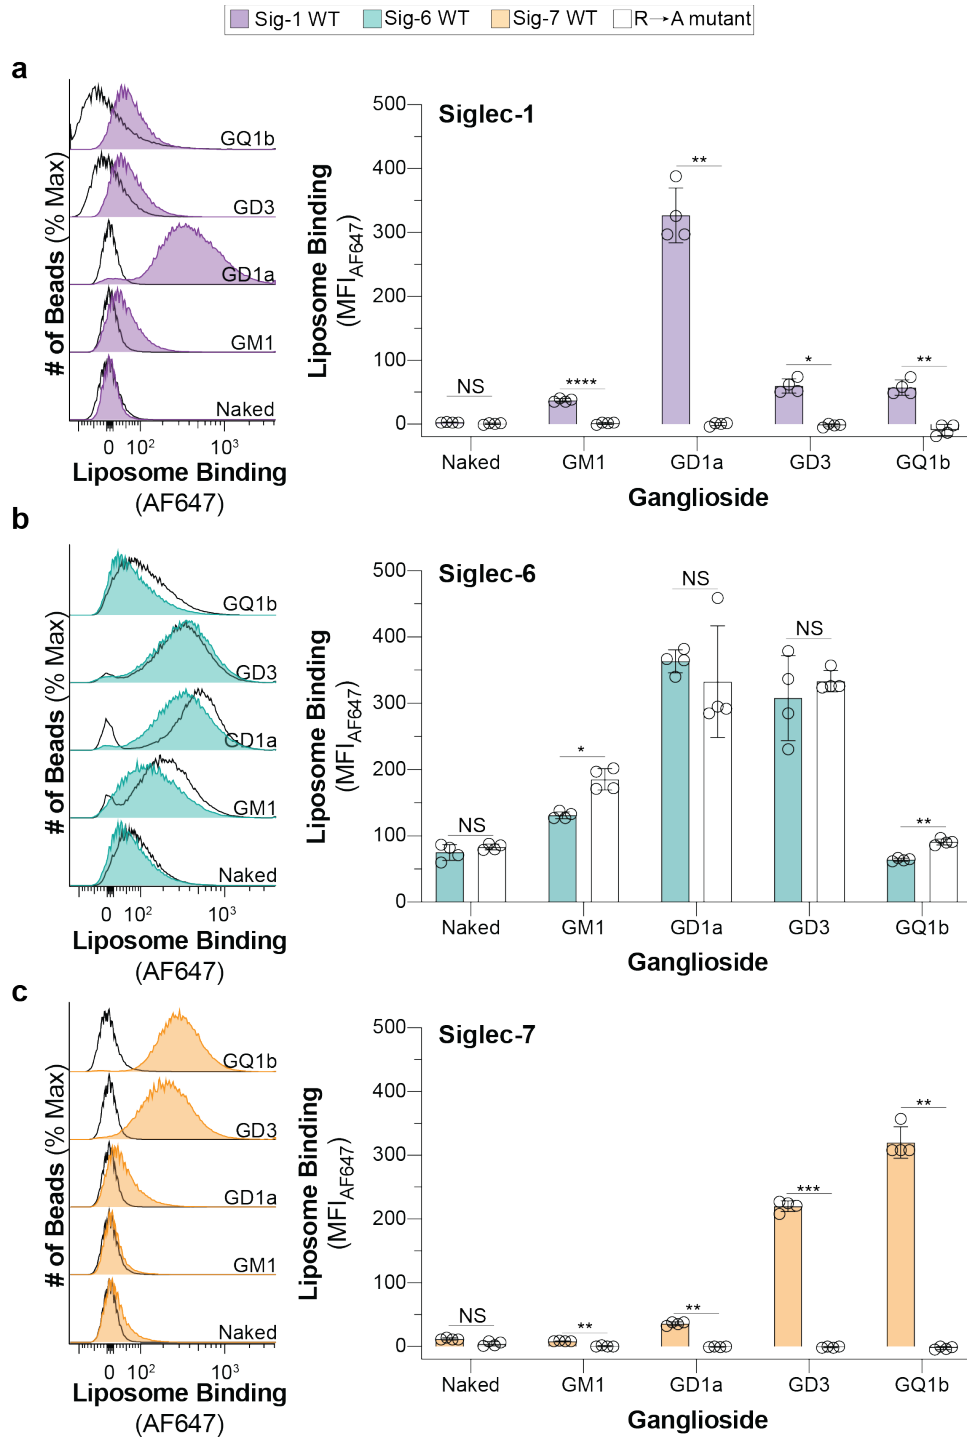

**Supplementary Fig. 16: Siglec-Fc complexed with streptavidin microbeads bind GLLs.** Binding of GLLs to streptavidin beads preincubated with Siglec-1 (a), Siglec-6 (b), and Siglec-7 (c) soluble Fc. Data is presented with a representative flow cytometry histogram and was quantified as the mean  $\pm$  one standard deviation of the median fluorescent intensity (MFI) from four technical replicates. For panels a, b and c, a Brown-Forsythe and Welch one-way ANOVA was used to compare liposome binding between WT Siglec and its respective canonical arginine mutant. Not Significant (NS);  $P > 0.5$ ; \* =  $0.05 > P \geq 0.01$ ; \*\* =  $0.01 > P \geq 0.001$ ; \*\*\* =  $0.001 > P \geq 0.0001$ ; \*\*\*\* =  $P < 0.0001$ .

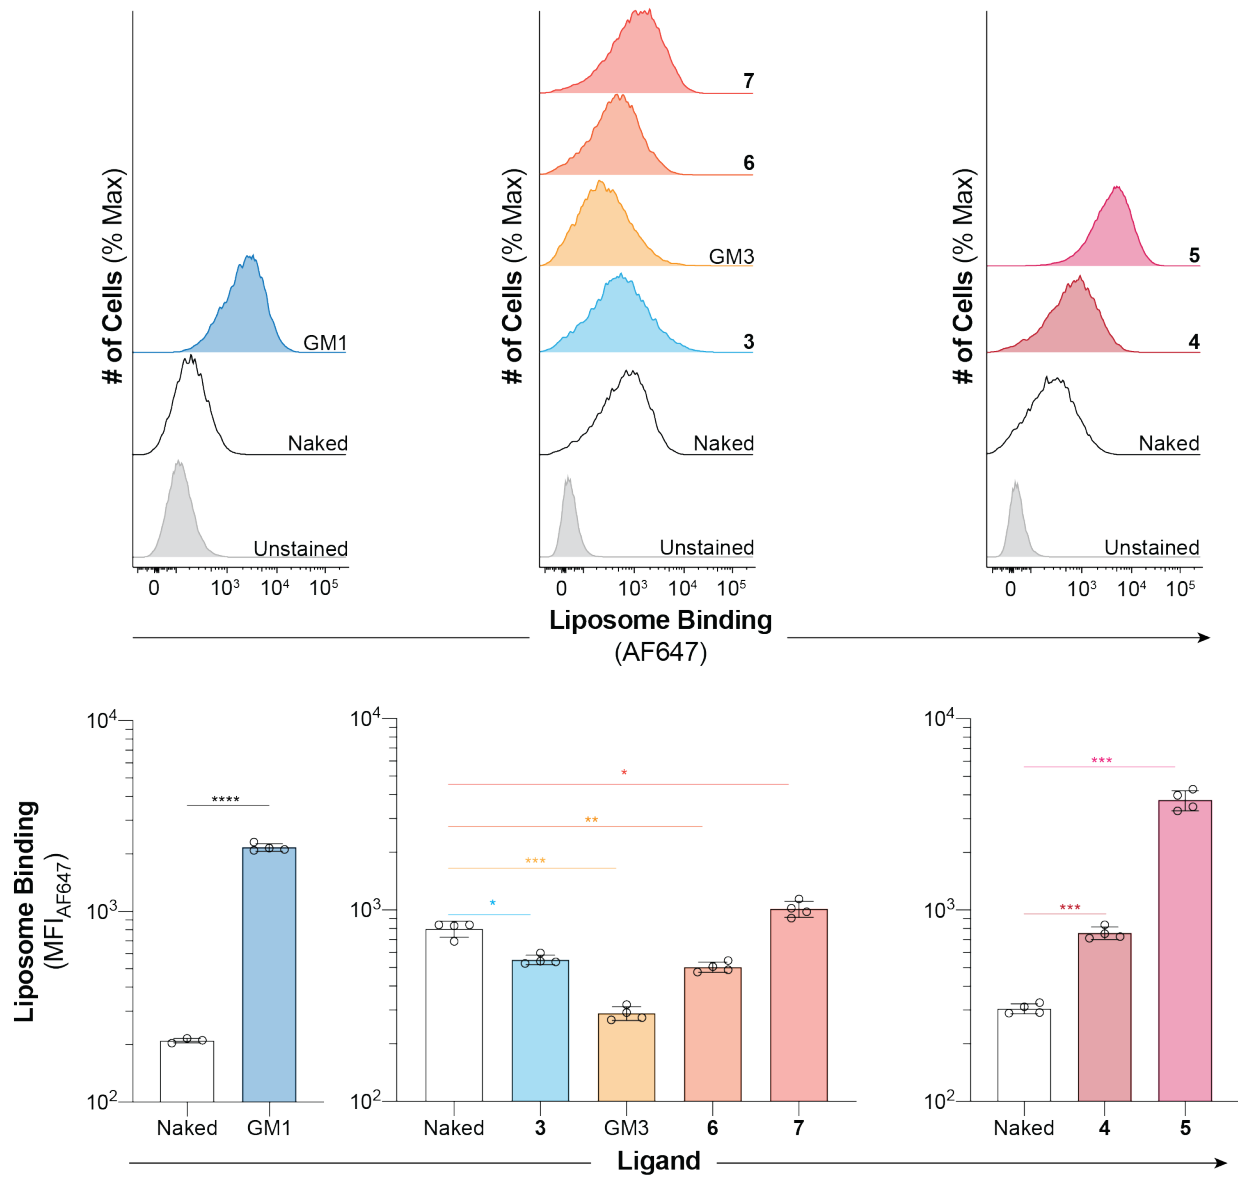

**Supplementary Fig. 17: Binding of liposomes formulated with nGLs to CHO cells expressing WT Siglec-6.** Liposomes formulated with 3 mol% nGLs binding to CHO cells expressing WT Siglec-6. Data is presented with a representative flow cytometry histogram and was quantified as the mean ± one standard deviation of the median fluorescent intensity (MFI) from four technical replicates. A Brown-Forsythe and Welch one-way ANOVA was used to compare liposomes binding of liposomes formulated with various nGLs to naked liposomes. Not Significant (NS);  $P > 0.5$ ; \* =  $0.05 > P \geq 0.01$ ; \*\* =  $0.01 > P \geq 0.001$ ; \*\*\* =  $0.001 > P \geq 0.0001$ ; \*\*\*\* =  $P < 0.0001$ .

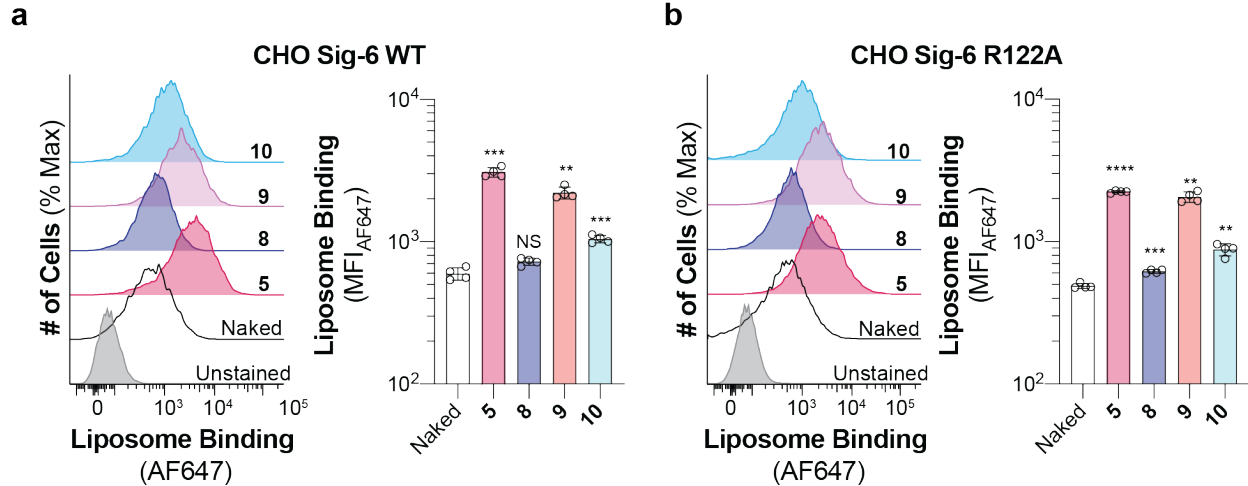

**Supplementary Fig. 18: The nonconical glycolipid binding site on Siglec-6 prefers  $\alpha$ -(2→3) over  $\alpha$ -(2→6) sialosides and a modest preference for lactose over LacNAc scaffold. a, b, Binding liposomes formulated with 3 mol% 5, 8, 9 and 10 to CHO cells expressing WT and R122A Siglec-6 respectively. Data is presented with a representative flow cytometry histogram and was quantified as the mean  $\pm$  one standard deviation of the median fluorescent intensity (MFI) from four technical replicates. For panels a and b, a Brown-Forsythe and Welch one-way ANOVA was used to compare the binding of liposomes formulated with nGLs to naked liposomes. Not Significant (NS);  $P > 0.5$ ; \*\* =  $0.01 > P \geq 0.001$ ; \*\*\* =  $0.001 > P \geq 0.0001$ ; \*\*\*\* =  $P < 0.0001$ .**

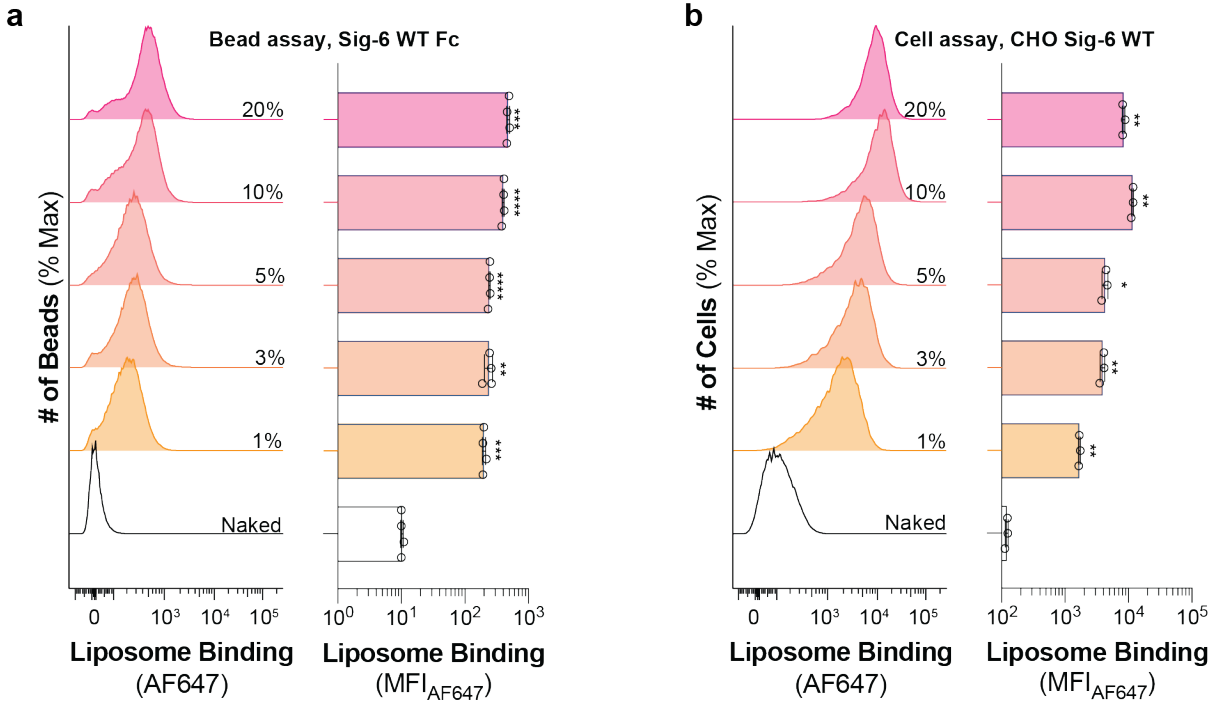

**Supplementary Fig. 19: Optimizing the mol% of 5 in nGLLs for engaging Siglec-6.** **a**, Titration of **5** in liposomes in the bead assay against streptavidin bead complexed with recombinant WT Siglec-6-Fc. **b**, Titration of **5** in liposomes in the cell assay against CHO cells expressing WT Siglec-6. Data is presented with a representative flow cytometry histogram and was quantified as the mean  $\pm$  one standard deviation of the median fluorescent intensity (MFI) from four technical replicates. For panels **a** and **b**, a Brown-Forsythe and Welch one-way ANOVA was used to compare the binding of liposomes formulated with nGLLs to naked liposomes.  $P > 0.5$ ; \* =  $0.05 > P \geq 0.01$ ; \*\* =  $0.01 > P \geq 0.001$ ; \*\*\* =  $0.001 > P \geq 0.0001$ ; \*\*\*\* =  $P < 0.0001$ .

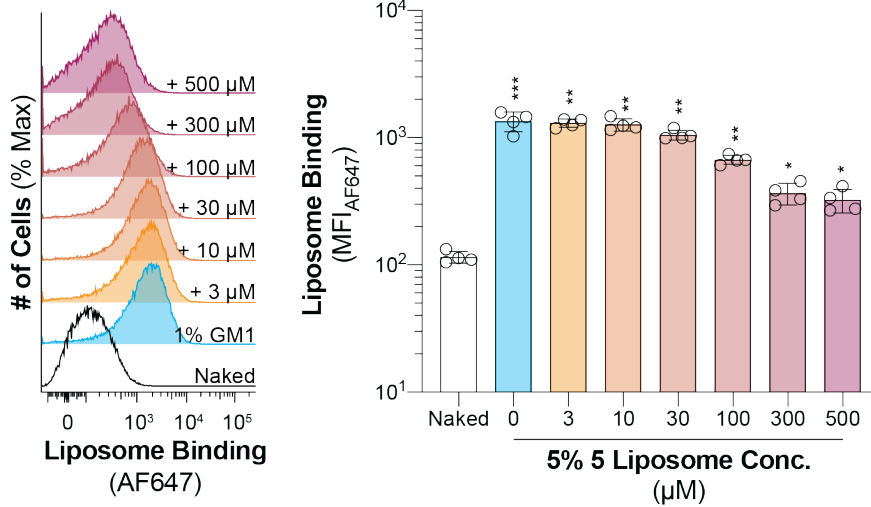

**Supplementary Fig. 20: Binding competition between GM1 GLLs and 5 nGLLs against WT Siglec-6.** Binding of 1 mol% GM1 liposomes to WT Siglec-6 in the presence of an increasing concentration of 5 mol% **5** nGLLs. Data is presented with a representative flow cytometry histogram and was quantified as the mean  $\pm$  one standard deviation of the median fluorescent intensity (MFI) from four three technical replicates. A Brown-Forsythe and Welch one-way ANOVA was used to compare the binding of liposomes formulated with nGLLs to naked liposomes.  $P > 0.5$ ; \* =  $0.05 > P \geq 0.01$ ; \*\* =  $0.01 > P \geq 0.001$ ; \*\*\* =  $0.001 > P \geq 0.0001$ .

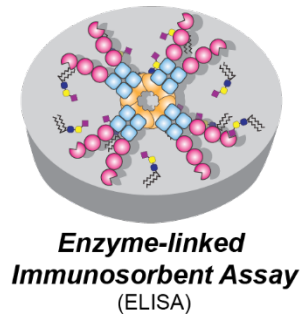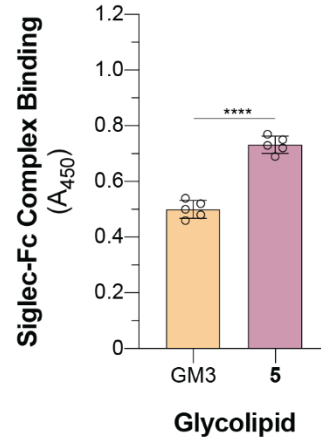

**Supplementary Fig. 21: Comparison of the binding of Siglec-6-Fc complex to GM3 and nGL 5 outside of a lipid bilayer.** Data is represented as the mean  $\pm$  one standard deviation of five technical replicants of the background corrected  $A_{450nm}$ . The background was measured using an ethanol vehicle control. A two tailed Student's t-test was used for statistical analysis. \*\*\*\* =  $P < 0.0001$ ..

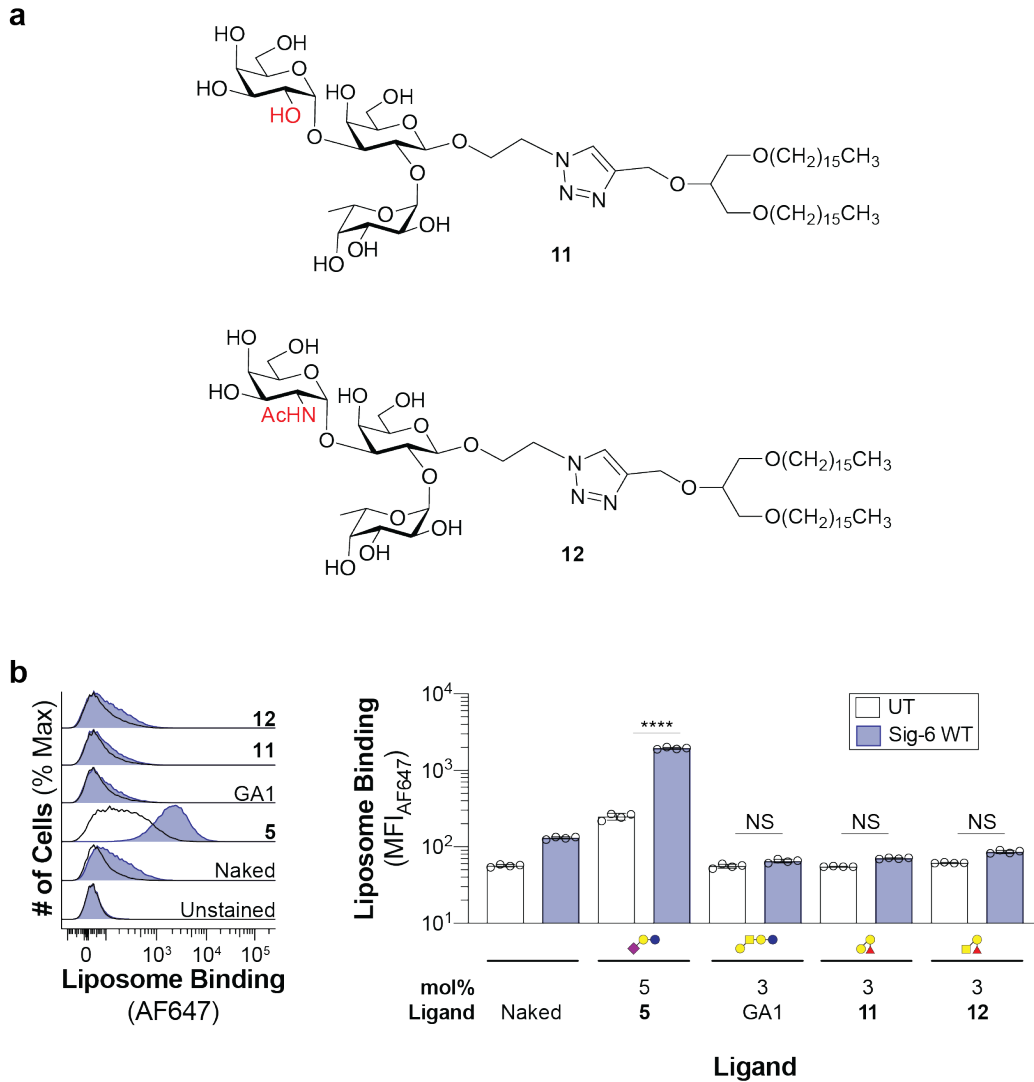

**Supplementary Fig. 22: Siglec-6 does not engage nGLs formulated with asialo neoglycolipids. a,** Chemical structures of nGLs **11** and **12**. **b,** Liposome binding of **5**, GA1, **11**, and **12** to UT and WT Siglec-6 CHO cells. Data is presented with a representative flow cytometry histogram and was quantified as the mean  $\pm$  one standard deviation of the median fluorescent intensity (MFI) from four technical replicates. For panel **b**, a Brown-Forsythe and Welch one-way ANOVA was used to compare binding of each liposome formulated with each glycolipid to untransfected CHO cells and CHO cells expressing WT Siglec-6. Not Significant (NS); \*\*\*\* =  $P < 0.0001$ .



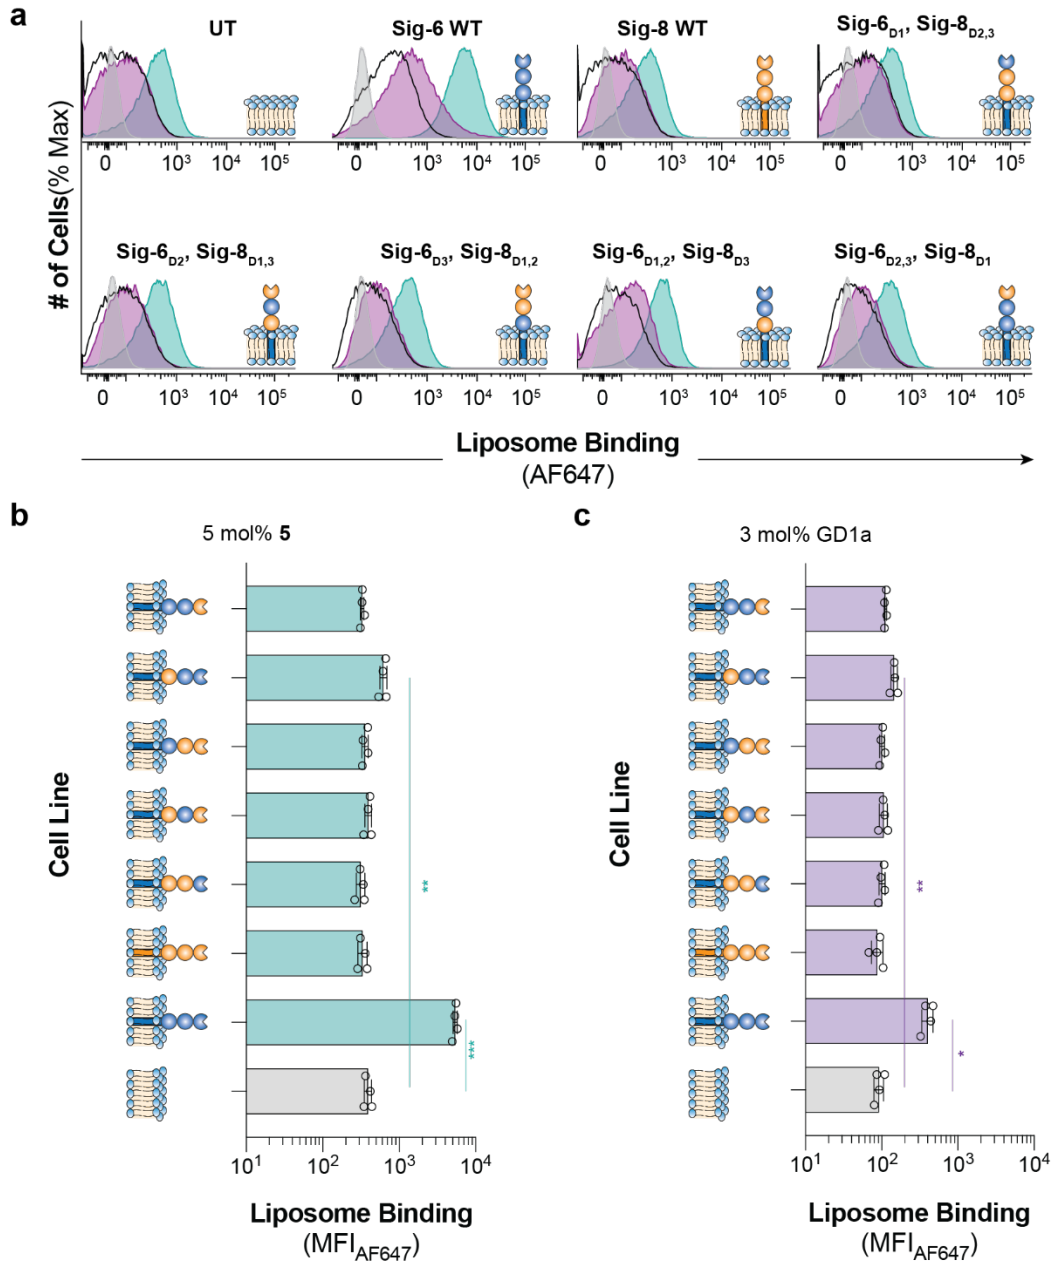

**Supplementary Fig. 23: The V-set domain and first C2 domain of Siglec-6 are both required to bind glycolipids.** **a**, Representative flow cytometry histograms of 5 and GD1a liposomes binding to Siglec-6/8 chimeras. **b**, Binding of liposomes formulated with 5 mol% 5 to CHO cells expressing each Siglec-6/8 chimera. **c**, Binding of liposomes were formulated with 3 mol% GD1a to CHO cells expressing each Siglec-6/8 chimera. For panels **b** and **c**, data was quantified as the mean  $\pm$  one standard deviation of the median fluorescent intensity (MFI) from four technical replicates. A Brown-Forsythe and Welch one-way ANOVA was used to compare liposome binding to CHO cells expressing WT Siglec-6 and Siglec-6<sub>D1,2</sub>, Sig-8<sub>D3</sub> to UT CHO cells.  $P > 0.5$ ; \* =  $0.05 > P \geq 0.01$ ; \*\* =  $0.01 > P \geq 0.001$ ; \*\*\* =  $0.001 > P \geq 0.0001$ .

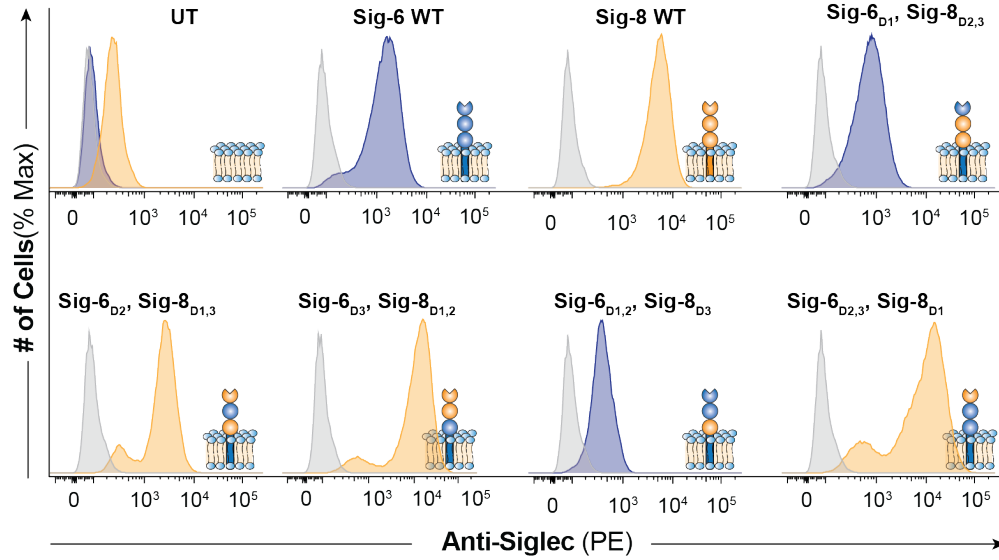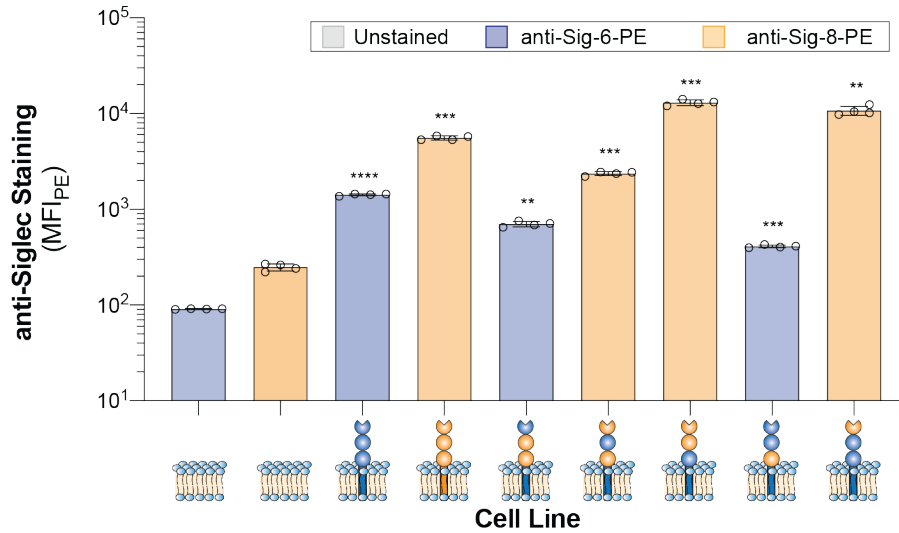

**Supplementary Fig. 24: Expression levels of Siglec-6/8 chimeras on CHO cells.** Representative flow cytometry histograms of antibody staining to Siglec-6/8 chimeras. Data is presented with a representative flow cytometry histogram and was quantified as the mean  $\pm$  one standard deviation of the median fluorescent intensity (MFI) from four technical replicates. A Brown-Forsythe and Welch one-way ANOVA was used to compare the level of anti-Siglec-6/8 staining of each chimera to untransfected CHO cells. \*\* =  $0.01 > P \geq 0.001$ ; \*\*\* =  $0.001 > P \geq 0.0001$ ; \*\*\*\* =  $P < 0.0001$ .

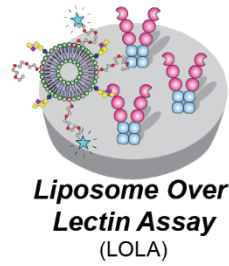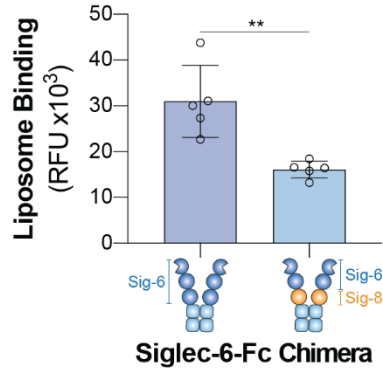

**Supplementary Fig. 25: A chimera of Siglec-6/8 containing the first two extracellular domains of Siglec-6 and the third extracellular domain of Siglec-8 shows significant binding in the LOLA.** Data is presented as the mean of five technical replicates  $\pm$  one standard deviation of the background subtracted (naked liposome) relative fluorescence units (RFU). A two tailed Student's t-test was used for statistical analysis. \*\* =  $0.01 > P \geq 0.001$ ;

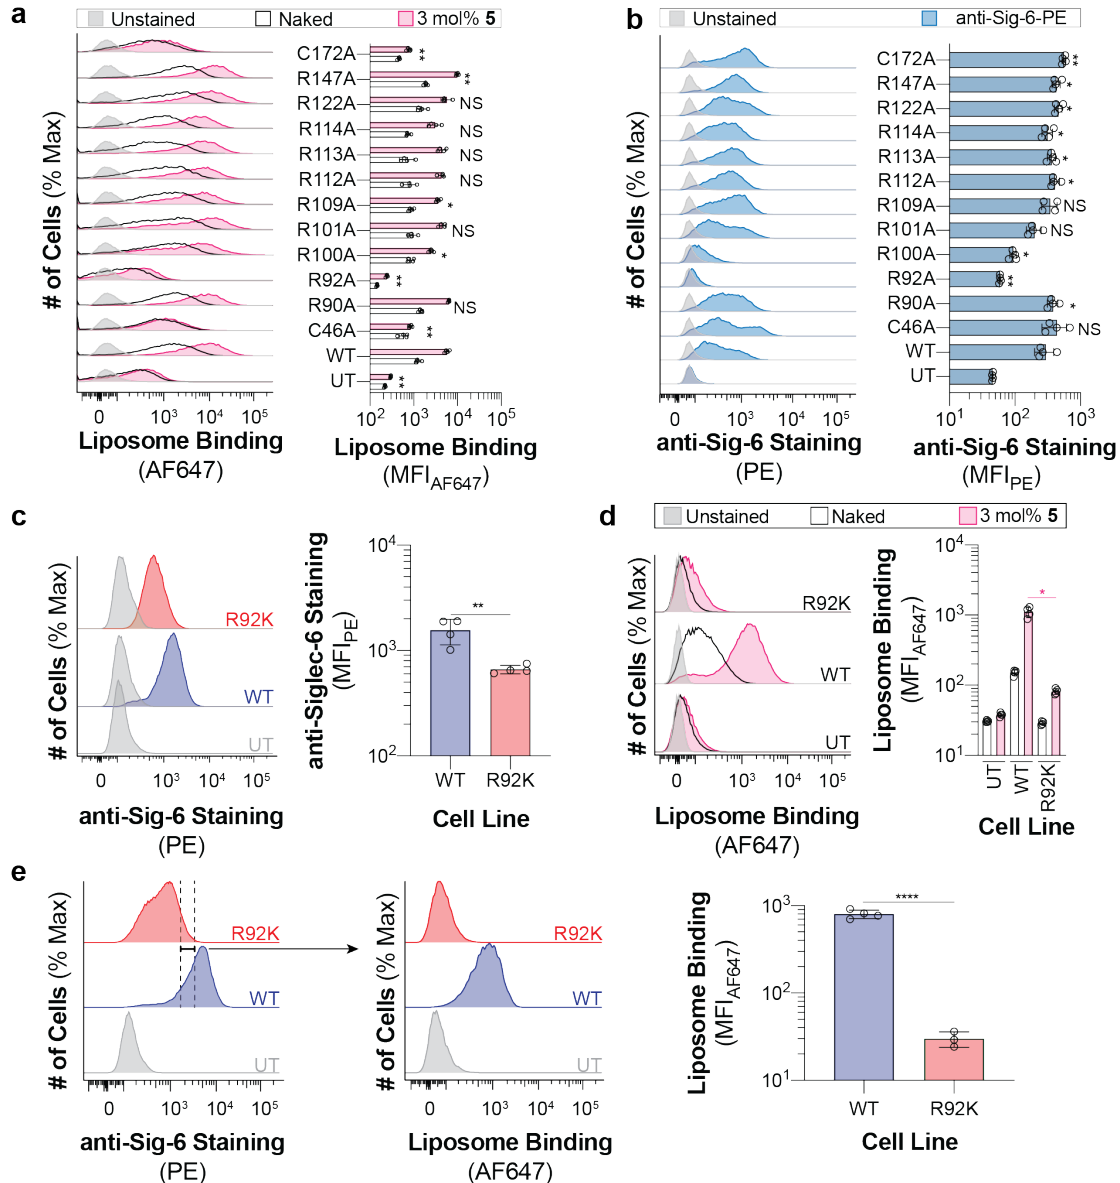

**Supplementary Fig. 26: Analysis of nGLL binding to Siglec-6 mutants on CHO cells.** **a**, 5 liposome binding to CHO cells expressing different mutants (R→A and C→A) of Siglec-6 (n=4 technical replicates). **b**, Siglec-6 expression levels on CHO cells expressing different mutants (R→A and C→A) of Siglec-6 (n=4 technical replicates). **c**, Siglec-6 expression levels on CHO cells expressing R92K Siglec-6 (n=4 technical replicates). **d**, 5 liposome binding to CHO cells expressing R92K Siglec-6 (n=4 technical replicates). **e**, 5 liposome binding to WT Siglec-6 and R92K Siglec-6 gated on identical Siglec-6 expression levels as defined by the gate (4≥n≥3 technical replicates). For all panels, data is presented with a representative flow cytometry histogram and was quantified as the mean ± one standard deviation of the median fluorescent intensity (MFI) from at least three technical replicates. A Brown-Forsythe and Welch one-way ANOVA was used for statistical analysis in panels **a**, **b**, and **d**. For panel **a**, statistical analysis was used to determine if the 5 liposome binding from was different between the WT and each mutant. For panel **b**, statistical analysis was used to determine if the anti-Siglec-6-PE staining was different compared to UT CHO cells. For panel **d**, statistical comparison was between the 5 liposome binding between WT Siglec-6 and R92K Siglec-6 CHO cells. For panels **c** and **e**, a two tailed Student's t-test was used for statistical analysis. Not Significant (NS); P > 0.5; \* = 0.05 > P ≥ 0.01; \*\* = 0.01 > P ≥ 0.001; \*\*\* = 0.001 > P ≥ 0.0001; \*\*\*\* = P < 0.0001.

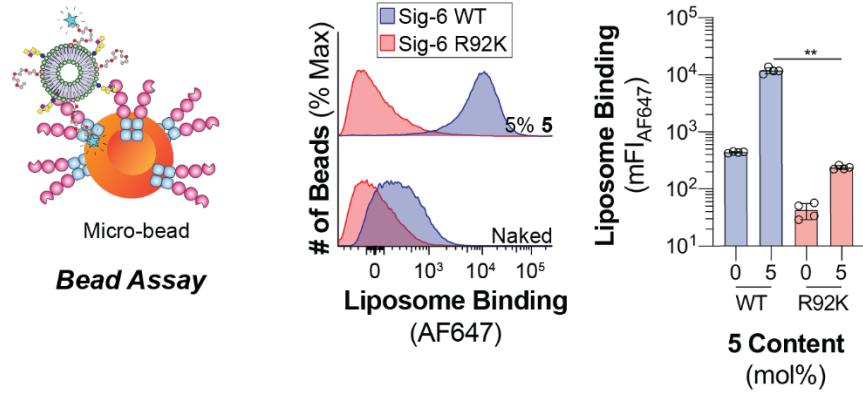

**Supplementary Fig. 27: Binding of 5 nGLLs to WT and R92K Siglec-6-Fc in the bead assay.** Data is presented with a representative flow cytometry histogram and was quantified as the mean  $\pm$  one standard deviation of the mean fluorescent intensity (mFI) from four technical replicates. A Brown-Forsythe and Welch one-way ANOVA was used to compare the binding of 5% 5 nGLLs between WT and R92K Siglec-6. \*\* = 0.01 > P  $\geq$  0.001.

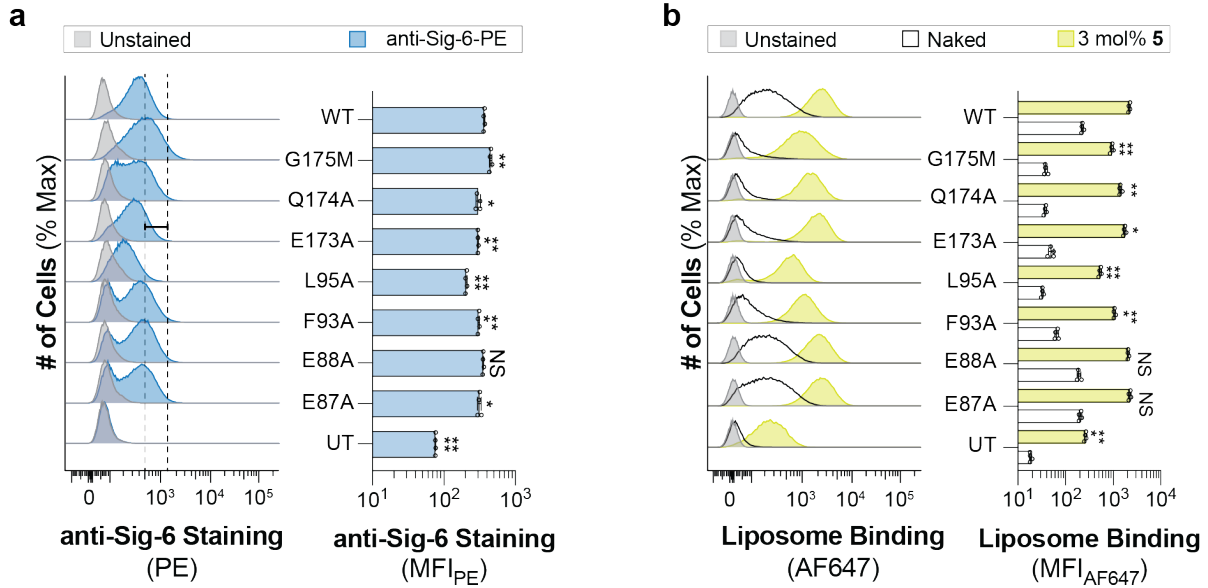

**Supplementary Fig. 28. Binding of liposomes formulated with 5% 5 to mutants of residues that reside at the interface of the V-set and first C2 domain of Siglec-6 on CHO cells. a,** Staining of Siglec-6 mutants with anti-Siglec-6-PE. **b,** 5 liposome binding to CHO cells expressing different mutants of Siglec-6. Data is presented with a representative flow cytometry histogram and was quantified as the mean  $\pm$  one standard deviation of the median fluorescence intensity (MFI) of four technical replicates. For panel **a**, a Brown-Forsythe and Welch one-way ANOVA was used to determine if the anti-Siglec-6-PE staining was different between the WT and each mutant. For panel **b**, a Brown-Forsythe and Welch one-way ANOVA was used to determine if the 5 liposome binding from was different between the WT and each mutant. Not Significant (NS);  $P > 0.5$ ; \* =  $0.05 > P \geq 0.01$ ; \*\* =  $0.01 > P \geq 0.001$ ; \*\*\* =  $0.001 > P \geq 0.0001$ ; \*\*\*\* =  $P < 0.0001$ .

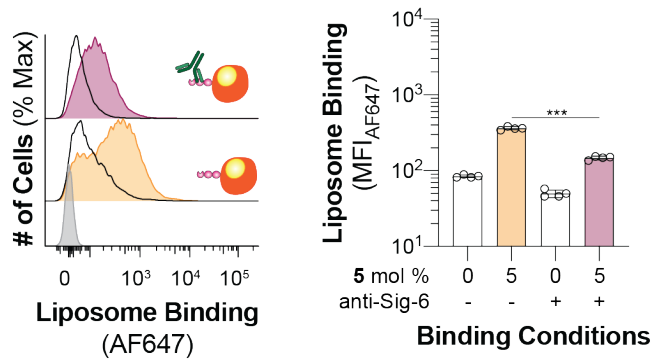

**Supplementary Fig. 29: Blocking nGLL binding to Siglec-6 expressing CHO cells with anti-Siglec-6 antibody.** CHO cells expressing Siglec-6 were pre-incubated with anti-Siglec-6 antibody prior to incubation with 5 nGLLs followed by flow cytometry. Data is presented with a representative flow cytometry histogram and was quantified as the mean  $\pm$  one standard deviation of the median fluorescent intensity (MFI) from four technical replicates. A Brown-Forsythe and Welch one-way ANOVA was used to compare 5 liposome binding before and after treatment with the anti-Siglec-6 antibody to Siglec-6 expressing CHO cells. \*\*\* = 0.001 > P  $\geq$  0.0001.

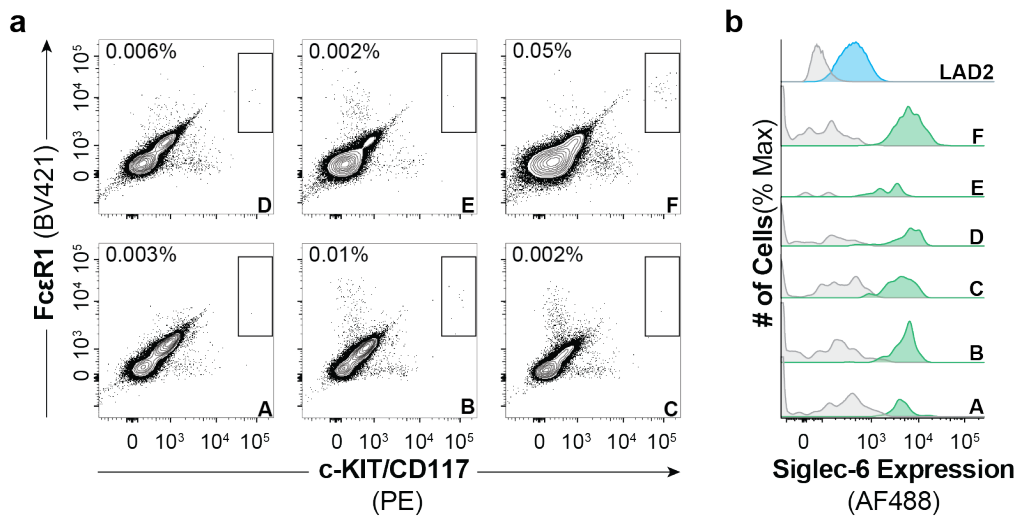

**Supplementary Fig. 30: Characterization of expression of Siglec-6 of primary mast cells isolated from human spleens.** **a**, Mast cells from six different healthy donors (represented by capital letters) identified as FcεR1 and c-KIT/CD117 positive. Percentages of mast cells in total white blood cells are in upper left corner of each plot. **b**, Representative flow cytometry of Siglec-6 expression on LAD2 cells and primary mast cells stained with anti-Siglec-6-AF488.



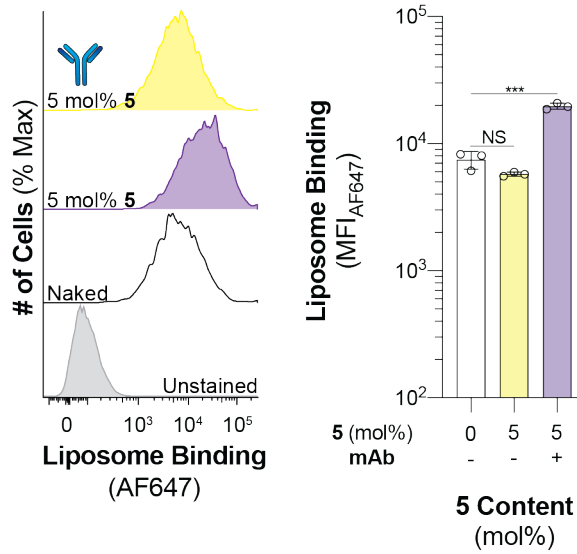

**Supplementary Fig. 31: Blocking of 5 nGLL binding to LAD2 cells with anti-Siglec-6 antibody.** LAD2 were pre-incubated with anti-Siglec-6 antibody prior to incubation with 5 nGLLs followed by analysis by flow cytometry. Data is presented with a representative flow cytometry histogram and was quantified as the mean  $\pm$  one standard deviation of the median fluorescent intensity (MFI) from three technical replicates. A Brown-Forsythe and Welch one-way ANOVA was used to compare 5 liposome binding to naked liposome binding. Not Significant (NS); \*\*\* = 0.001 > P  $\geq$  0.0001.

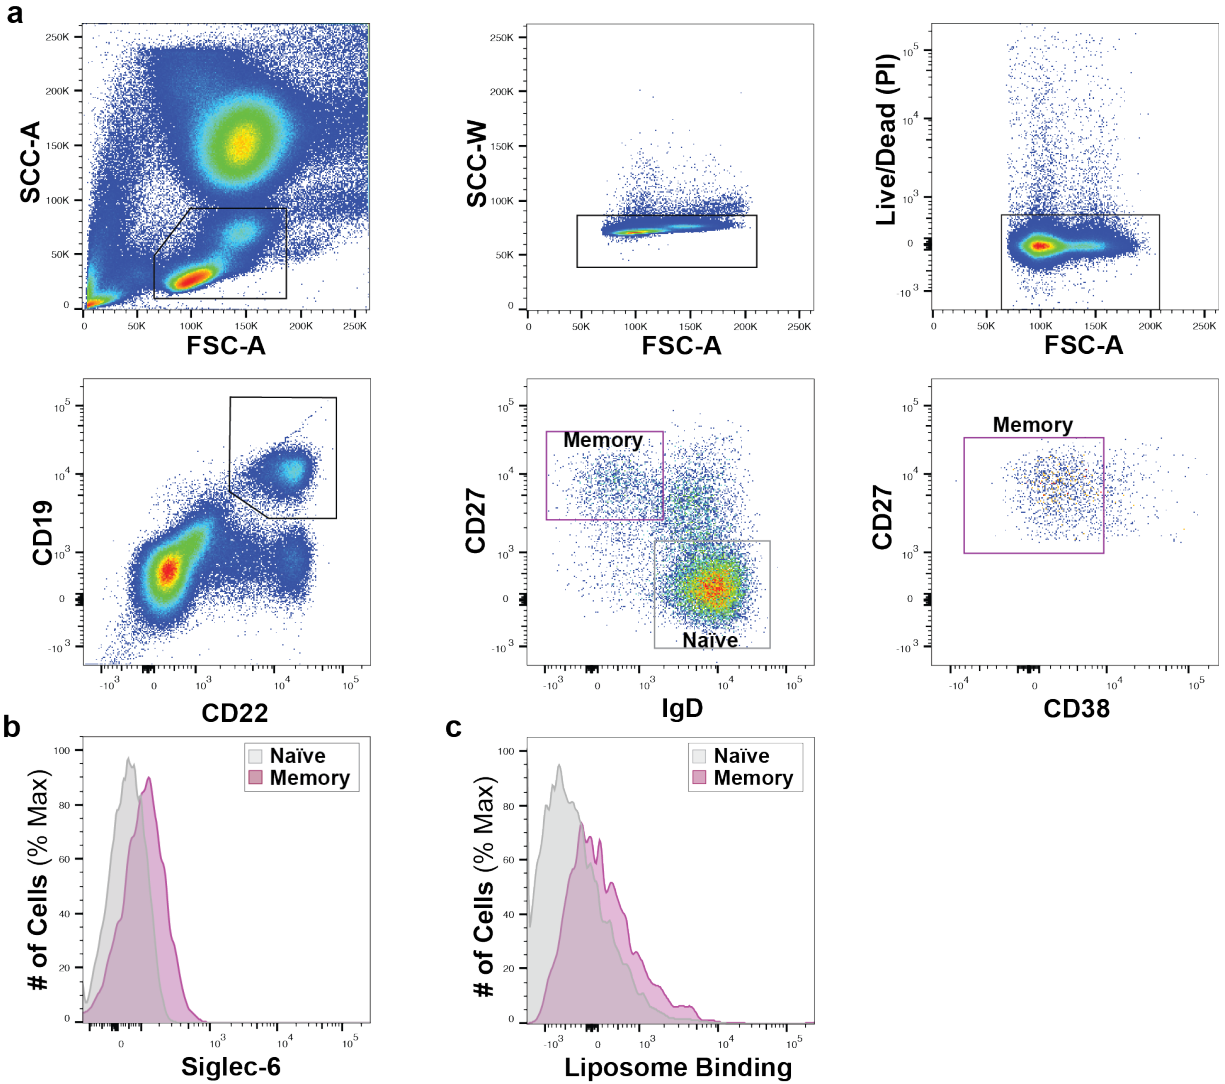

**Supplementary Fig. 32: Binding of nGLLs to peripheral blood memory B-cells.** **a**, Gating scheme for defining Memory B-cells (CD19<sup>+</sup>, CD22<sup>+</sup>, CD27<sup>+</sup>, IgD<sup>-</sup>, CD38<sup>-</sup>) and naïve B-cells (CD19<sup>+</sup>, CD22<sup>+</sup>, CD27<sup>-</sup>, IgD<sup>+</sup>) from peripheral blood mononuclear cells (PBMCs). **b** and **c**, 5 nGLL were incubated with PBMCs and analyzed for Siglec-6 expression (**b**) and liposome binding (**c**). Representative dot plots and histograms are presented from one biological replicate.

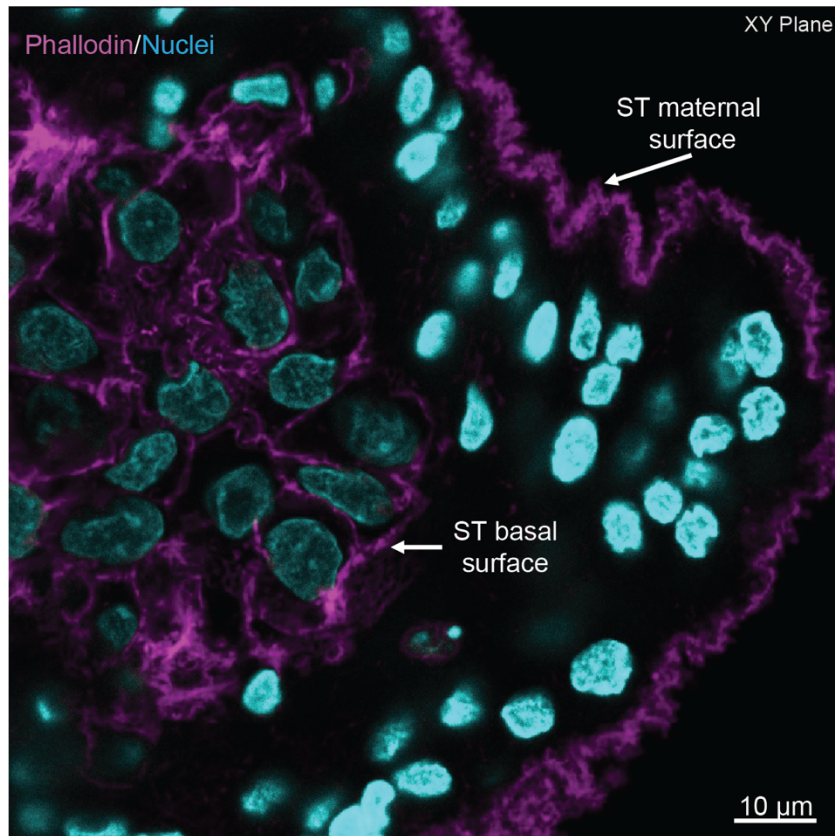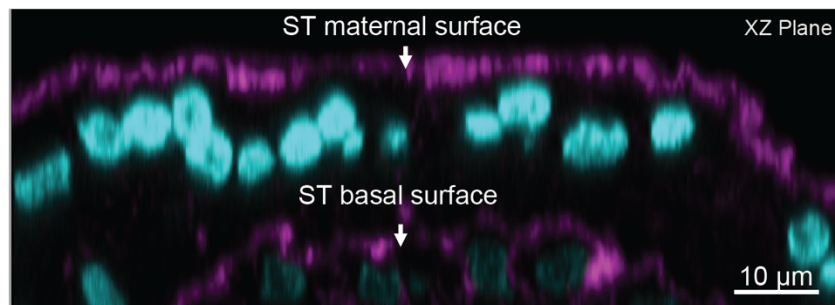

**Supplementary Fig. 33: Identification of human syncytiotrophoblasts based on F-actin staining pattern in explant cultures.** Representative images showing the unique F-actin (phalloidin; purple) structure of the apical surface of the first trimester human syncytiotrophoblast in cultured tissue explants (n=1 technical replicate). The syncytiotrophoblast maternal surface has a characteristic convoluted and highly branched F-actin structure that is distant from and structurally distinct from underlying mononuclear cytotrophoblast progenitors.

**a**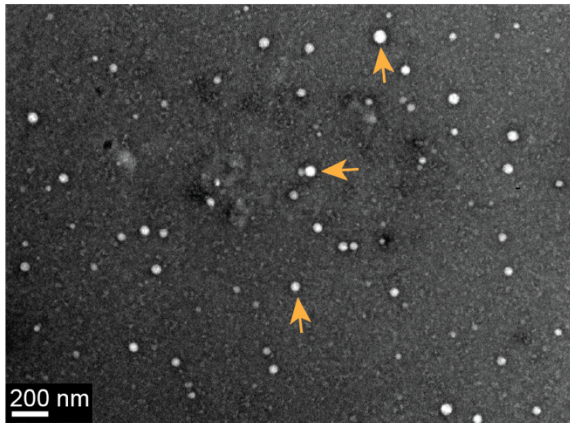**b**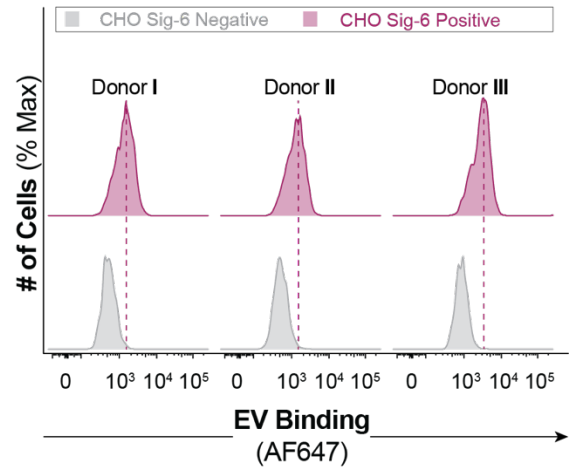

**Supplementary Fig. 34: Characterization of extracellular vesicles.** **a**, Transmission electron microscopy image of EVs isolated from peripheral human blood (n=1 technical replicate). **b**, Flow cytometry histograms of isolated EVs from three different donors labeled with AF647 to CHO cells expressing WT Siglec-6.

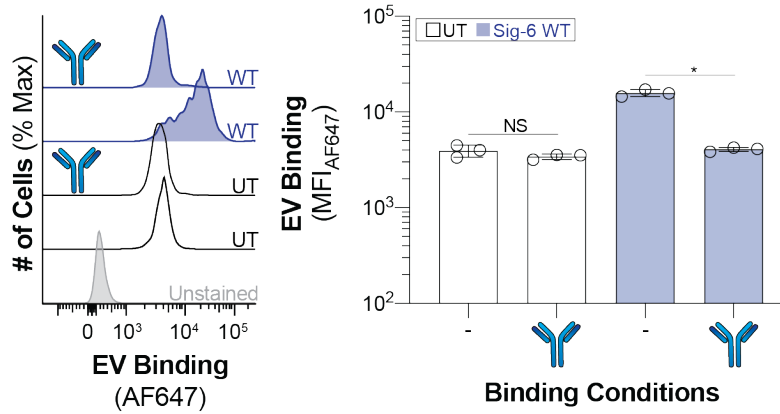

**Supplementary Fig. 35: Binding of EVs to untransfected CHO cells and CHO cells expressing WT Siglec-6 after being blocked with anti-Siglec-6.** Data is presented with a representative flow cytometry histogram and was quantified as the mean  $\pm$  one standard deviation of the median fluorescent intensity (MFI) from three technical replicates. A Brown-Forsythe and Welch one-way ANOVA was used to compare 5 liposome binding before and after treatment with the anti-Siglec-6 antibody to Siglec-6 expressing CHO cells. Not Significant (NS);  $P > 0.5$ ; \* =  $0.05 > P \geq 0.01$ .

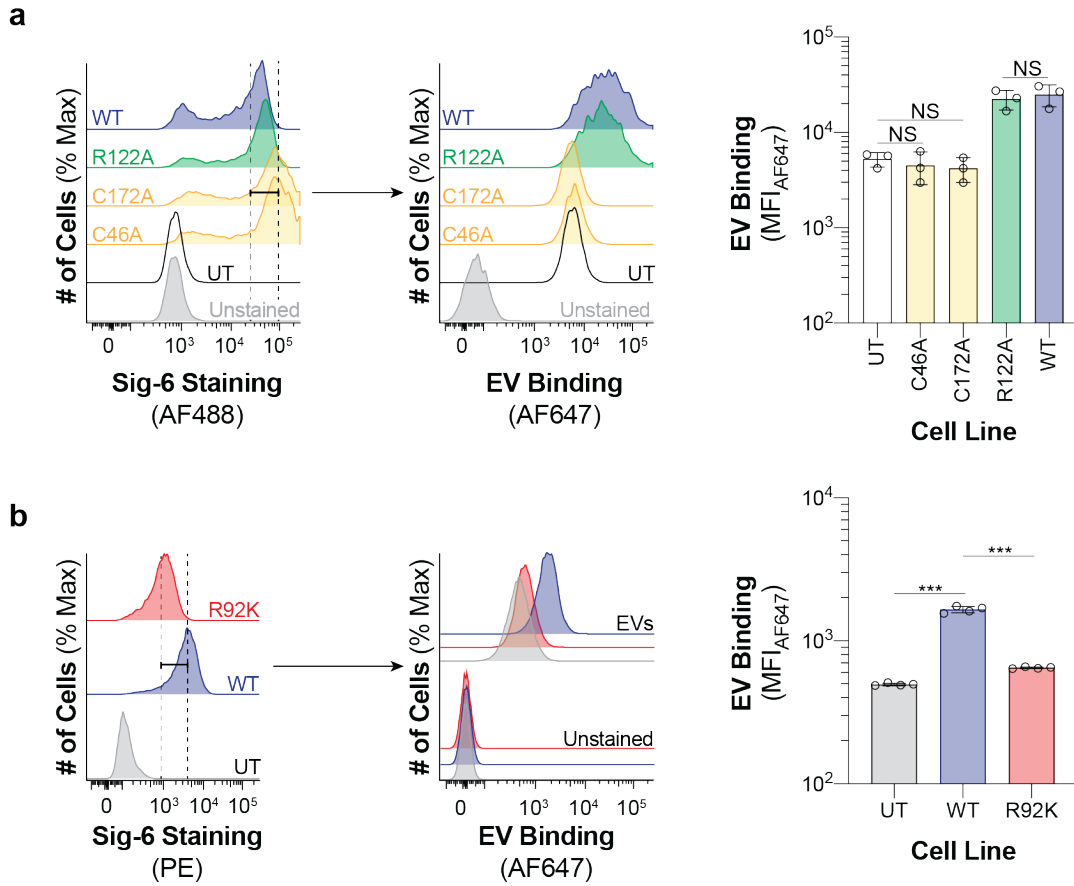

**Supplementary Fig. 36: Binding of EVs to wildtype and mutant Siglec-6 expressing CHO cells.** **a** and **b**, expression levels and EV binding to wildtype and C46A, R122A, C172A (n=3 technical replicates) and R92K (n=4 technical replicates) Siglec-6 expressing CHO cells respectively. Data is presented with a representative flow cytometry histogram and was quantified as the mean  $\pm$  one standard deviation of the median fluorescent intensity (MFI) from at least three technical replicates. For panels **a** and **b**, a Brown-Forsythe and Welch one-way ANOVA was used for statistical analysis. Not Significant (NS); \*\*\* = 0.001 > P  $\geq$  0.0001.

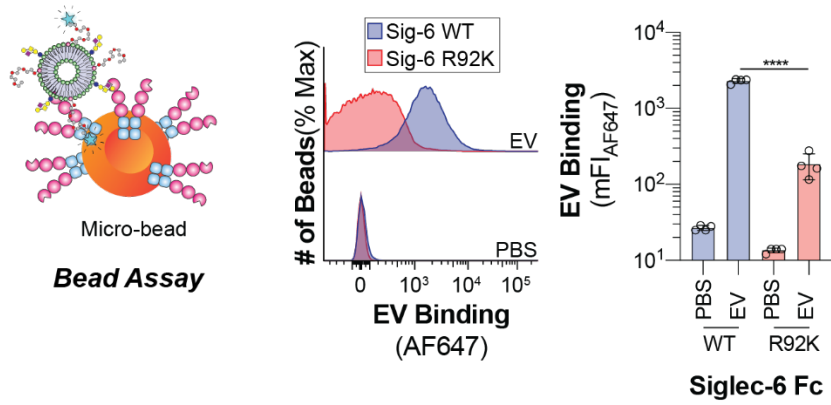

**Supplementary Fig. 37: Binding of EVs to Siglec-6 R92K-Fc in bead assay.** Data is presented with a representative flow cytometry histogram and was quantified as the mean  $\pm$  one standard deviation of the mean fluorescent intensity (mFI) from four technical replicates. A Brown-Forsythe and Welch one-way ANOVA was used to compare the binding of 5% 5 nGLLs between WT and R92K Siglec-6. \*\*\*\* =  $P < 0.0001$ .

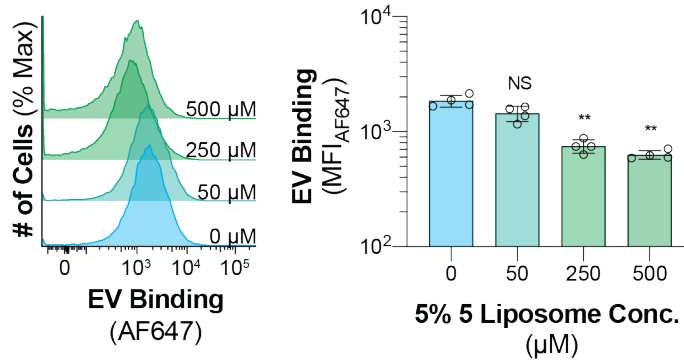

**Supplementary Fig. 38: Binding competition between EVs and 5 nGLLs against WT Siglec-6.** Binding of EVs to WT Siglec-6 in the presence of an increasing amount of 5 mol% **5** nGLLs. Data is presented with a representative flow cytometry histogram and the median fluorescent intensity of each replicate. The black dashed line represents the mean MFI of the naked liposomes. Data is presented with a representative flow cytometry histogram and was quantified as the mean  $\pm$  one standard deviation of the media fluorescent intensity (MFI) from four technical replicates. A Brown-Forsythe and Welch one-way ANOVA was used to compare the binding of liposomes formulated with nGLLs to naked liposomes. Not Significant (NS);  $P > 0.5$ ; \*\* =  $0.01 > P \geq 0.001$ .



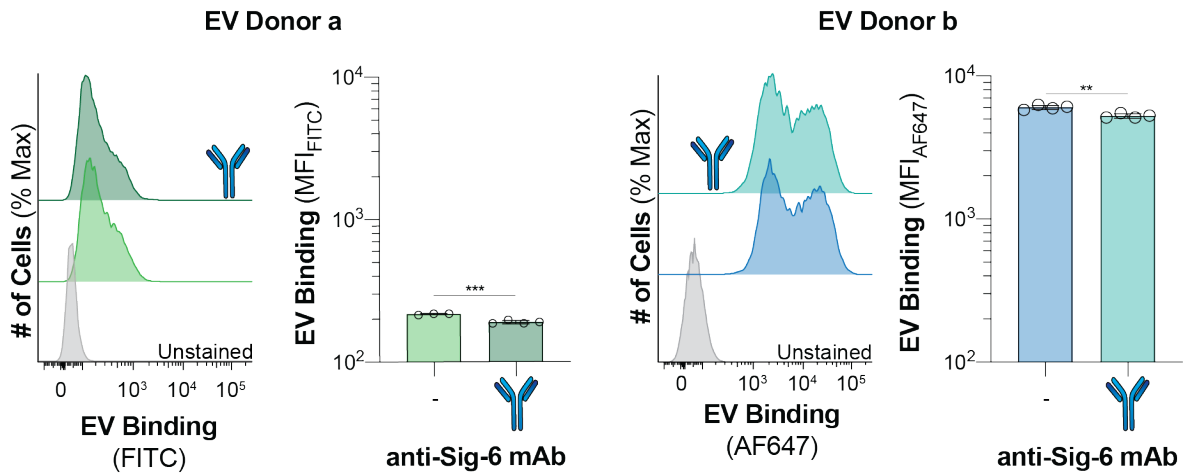

**Supplementary Fig. 39: Blocking of EV binding from two different donors to LAD2 cells with anti-Siglec-6 antibody.** LAD2 were pre-incubated with anti-Siglec-6 antibody prior to incubation with EVs followed by analysis by flow cytometry. Data is presented with a representative flow cytometry histogram and was quantified as the mean  $\pm$  one standard deviation of the median fluorescent intensity (MFI) from four technical replicates. A two tailed Student's t-test was used for statistical analysis. \*\* =  $0.01 > P \geq 0.001$ .

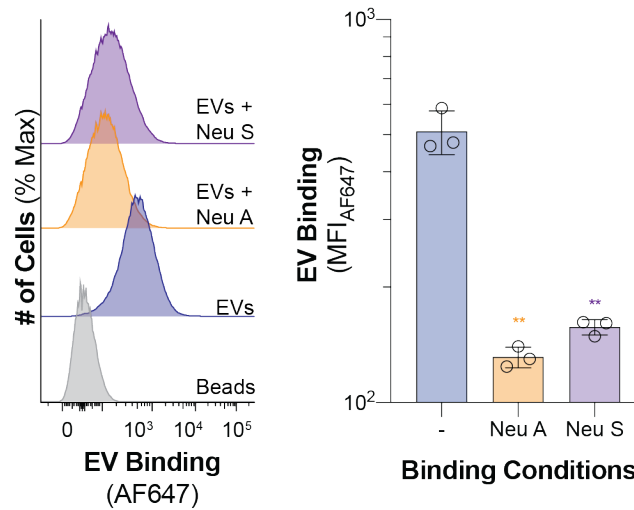

**Supplementary Fig. 40: Enzymatic removal of sialic acid from EVs abrogates binding to Siglec-6.** EVs were treated with neuraminidase S, neuraminidase A, or BSA prior to incubation with Streptavidin microbeads containing immobilized WT Siglec-6-Fc followed by analysis by flow cytometry. Data is presented with a representative flow cytometry histogram and was quantified as the mean  $\pm$  one standard deviation of the median fluorescent intensity (MFI) from three technical replicates. A Brown-Forsythe and Welch one-way ANOVA was used to compare EV binding before and after treatment with the Neu A or Neu S to Siglec-6 expressing CHO cells. \*\* =  $0.01 > P \geq 0.001$ .

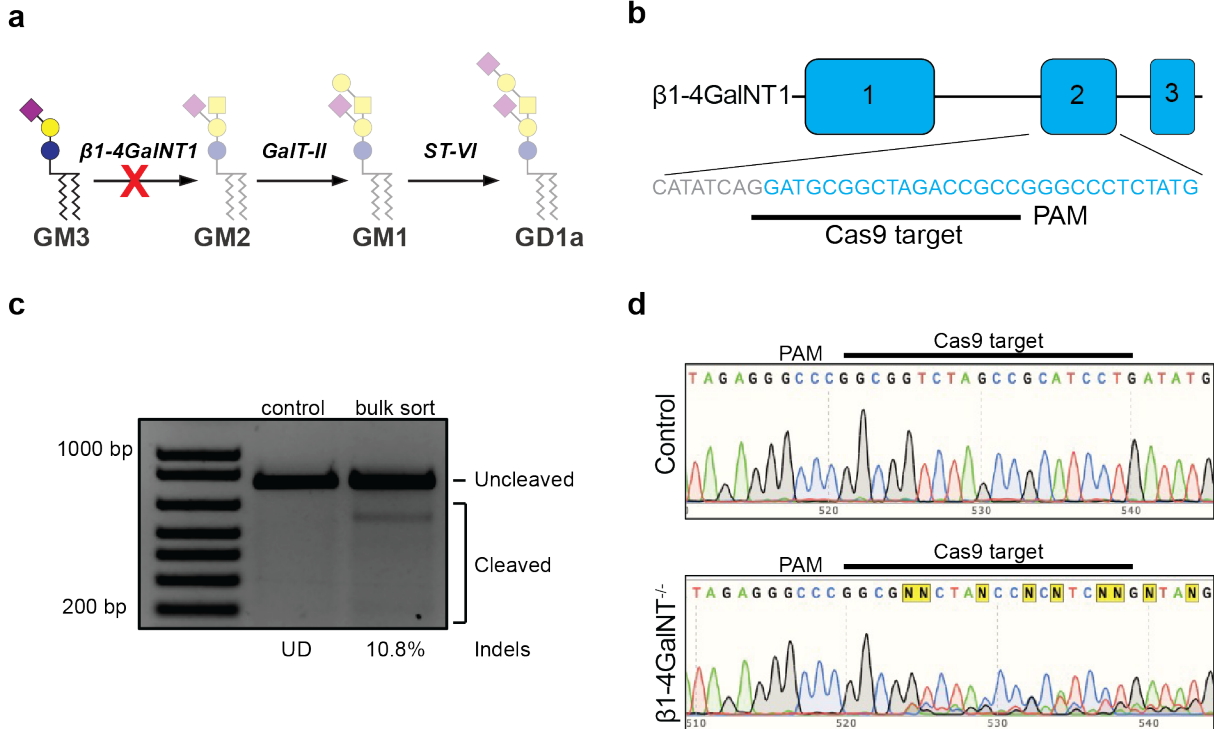

**Supplementary Fig. 41: Complex gangliosides in EVs are ligands for Siglec-6.** **a**, Abbreviated ganglioside biosynthesis highlighting the role of  $\beta1-4GalNT1$  in ganglioside biosynthesis<sup>12</sup>. **b**, Schematic illustration of the Cas9 target site used to generate  $\beta1-4GalNT1^{-/-}$  cells. Intronic sequences are indicated by grey lettering, while blue lettering indicates exons. **c**, Gel showing relative cellular cleavage efficiencies of the untreated, parental cells against a population of cells FACS sorted for ATTO-550 fluorescence following Cas9 RNP transfection as determined by T7 endonuclease I digestion (n=1 technical replicate). **d**, Sanger sequencing trace of the  $\beta1-4galnt1$  target site for either parental control cells (above), or the monoclonal  $\beta1-4GALNT1^{-/-}$  cells (below).

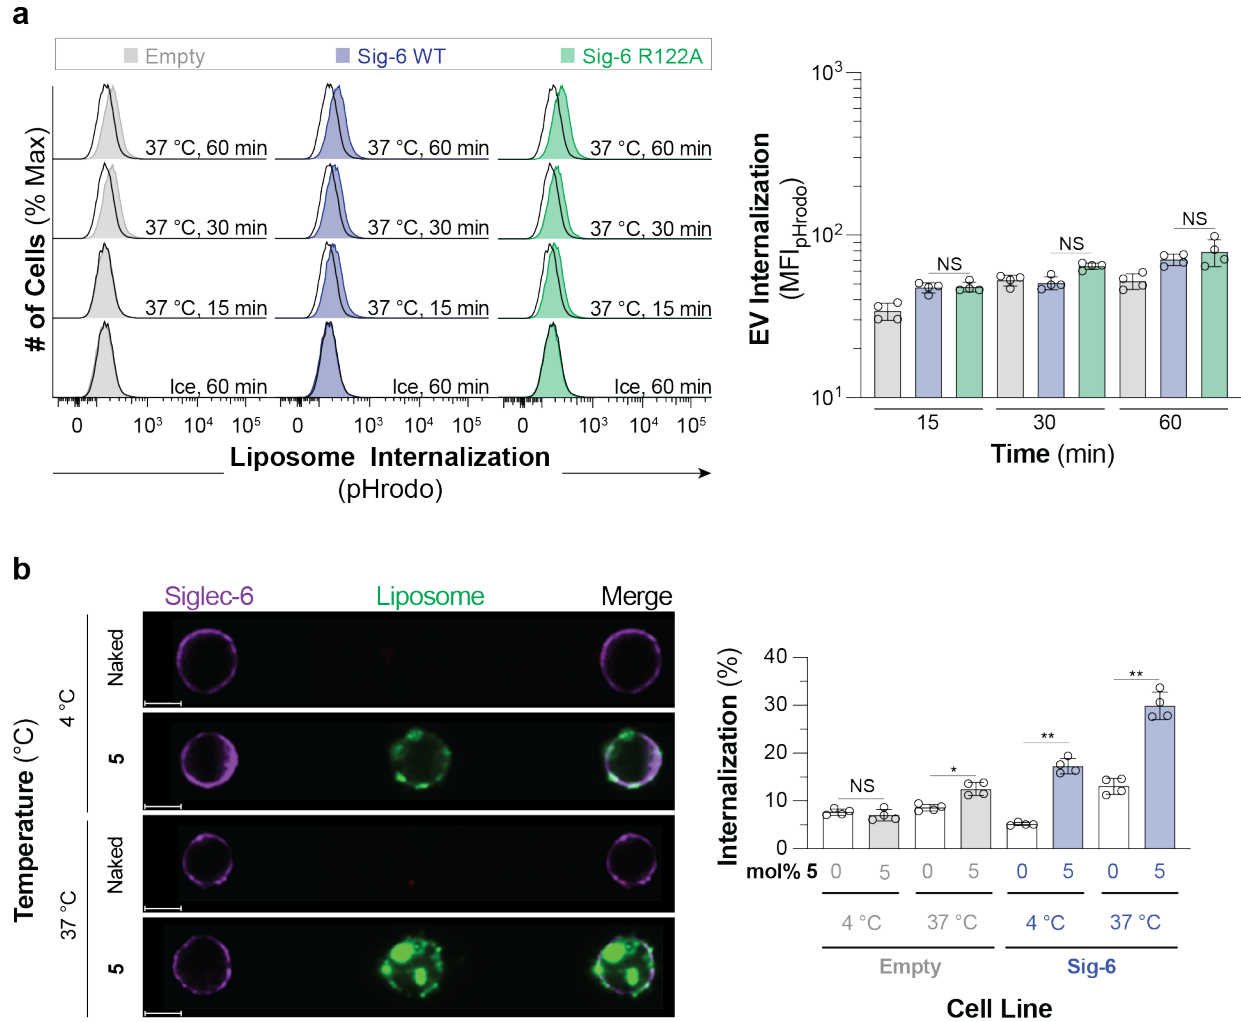

**Supplementary Fig. 42: Siglec-6 internalizes 5 GLs in Daudi cells.** **a**, Fluorescence of pHrodo labeled liposomes incubated with Daudi cells stably transduced with empty vector and WT Siglec-6 over 60 min at 4 °C or 37 °C. Data is presented with a representative flow cytometry histogram and was quantified as the mean  $\pm$  one standard deviation of the median fluorescent intensity (MFI) from at least three technical replicates. **b**, Imaging flow cytometry fluorescence of Daudi cells transduced with Siglec-6 incubated with AF647-labeled liposomes (green) for 60 min at 4 °C or 37 °C. Anti-Siglec-6-AF488 antibody staining (purple) shows the cell surface expression of Siglec-6. Scale bars represent 7  $\mu$ m. Imaging flow internalization data for empty vector and WT Siglec-6 virally transduced cells were quantified using IDEAS Software, version 6.2; error bars represent one standard deviation from the mean. Data is presented with a representative flow cytometry histogram and was quantified as the mean  $\pm$  one standard deviation of the median fluorescent intensity (MFI) from four technical replicates. For **a** and **b**, a Brown-Forsythe and Welch one-way ANOVA was used to compare if liposomes formulated with **5** were significantly higher than a naked liposome. Not Significant (NS);  $P > 0.5$ ; \* =  $0.05 > P \geq 0.01$ ; \*\* =  $0.01 > P \geq 0.001$ .

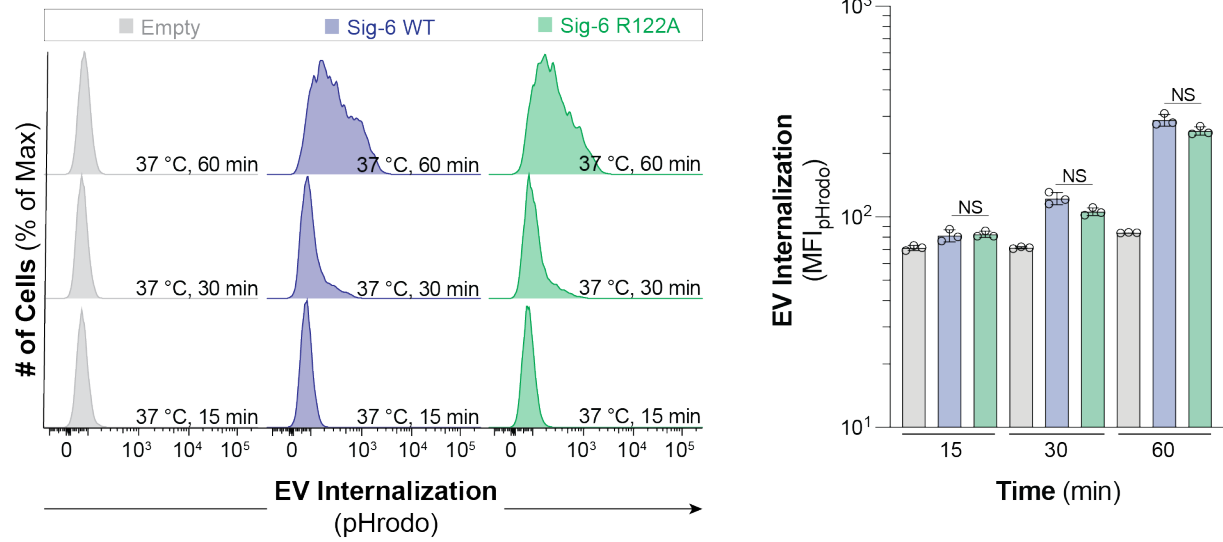

**Supplementary Fig. 43: Daudi cells internalizes EVs in a Siglec-6 dependent manner.** Daudi cell stably transduced with Siglec-6 or empty lentiviral vector were incubated with pHrodo labelled EVs for different amounts of time and analyzed by flow cytometry. Data is presented with a representative flow cytometry histogram and was quantified as the mean  $\pm$  one standard deviation of the media fluorescent intensity (MFI) from three technical replicates. A Brown-Forsythe and Welch one-way ANOVA was used for statistical analysis. Not Significant (NS).

## Supplementary References

1. Bhattacharjee A, *et al.* Increasing phagocytosis of microglia by targeting CD33 with liposomes displaying glycan ligands. *J Control Release* **338**, 680-693 (2021).
2. Hosoguchi K, *et al.* An efficient approach to the discovery of potent inhibitors against glycosyltransferases. *J Med Chem* **53**, 5607-5619 (2010).
3. Dziadek S, Jacques S, Bundle DR. A novel linker methodology for the synthesis of tailored conjugate vaccines composed of complex carbohydrate antigens and specific TH-cell peptide epitopes. *Chemistry* **14**, 5908-5917 (2008).
4. Nycholat CM, Rademacher C, Kawasaki N, Paulson JC. In silico-aided design of a glycan ligand of sialoadhesin for in vivo targeting of macrophages. *J Am Chem Soc* **134**, 15696-15699 (2012).
5. Han L, *et al.* Neoglycolipids as Glycosphingolipid Surrogates for Protein Binding Studies Using Nanodiscs and Native Mass Spectrometry. *Anal Chem* **92**, 14189-14196 (2020).
6. Johansson SM, Arnberg N, Elofsson M, Wadell G, Kihlberg J. Multivalent HSA conjugates of 3'-sialyllactose are potent inhibitors of adenoviral cell attachment and infection. *Chembiochem* **6**, 358-364 (2005).
7. Blixt O, Collins BE, van den Nieuwenhof IM, Crocker PR, Paulson JC. Sialoside specificity of the siglec family assessed using novel multivalent probes: identification of potent inhibitors of myelin-associated glycoprotein. *J Biol Chem* **278**, 31007-31019 (2003).
8. Yudina ON, Sherman AA, Nifantiev NE. Synthesis of propyl and 2-aminoethyl glycosides of  $\alpha$ -D-galactosyl-(1 $\rightarrow$ 3')- $\beta$ -lactoside. *Carbohydrate Research* **332**, 363-371 (2001).
9. Jumper J, *et al.* Highly accurate protein structure prediction with AlphaFold. *Nature* **596**, 583-589 (2021).
10. Vasiliu D, *et al.* Large-scale chemoenzymatic synthesis of blood group and tumor-associated poly-N-acetyllactosamine antigens. *Carbohydr Res* **341**, 1447-1457 (2006).
11. Han L, *et al.* How Choice of Model Membrane Affects Protein-Glycosphingolipid Interactions: Insights from Native Mass Spectrometry. *Anal Chem* **94**, 16042-16049 (2022).
12. Yu RK, Tsai YT, Ariga T, Yanagisawa M. Structures, biosynthesis, and functions of gangliosides--an overview. *J Oleo Sci* **60**, 537-544 (2011).
