# Supplementary material for: Siglec-6 mediates the uptake of extracellular vesicles through a noncanonical glycolipid binding pocket
Source: PubMed Central journal article supplement (PMC10122656; doi:10.1038/s41467-023-38030-6), 2023-04-22
Supplement: 41467_2023_38030_MOESM3_ESM.pdf [file 41467_2023_38030_MOESM3_ESM.pdf]

## Reporting Summary

Nature Portfolio wishes to improve the reproducibility of the work that we publish. This form provides structure for consistency and transparency in reporting. For further information on Nature Portfolio policies, see our [Editorial Policies](#) and the [Editorial Policy Checklist](#).

### Statistics

For all statistical analyses, confirm that the following items are present in the figure legend, table legend, main text, or Methods section.

- |                                     |                                                                                                                                                                                                                                                                                                |
|-------------------------------------|------------------------------------------------------------------------------------------------------------------------------------------------------------------------------------------------------------------------------------------------------------------------------------------------|
| n/a                                 | Confirmed                                                                                                                                                                                                                                                                                      |
| <input type="checkbox"/>            | <input checked="" type="checkbox"/> The exact sample size ( $n$ ) for each experimental group/condition, given as a discrete number and unit of measurement                                                                                                                                    |
| <input type="checkbox"/>            | <input checked="" type="checkbox"/> A statement on whether measurements were taken from distinct samples or whether the same sample was measured repeatedly                                                                                                                                    |
| <input type="checkbox"/>            | <input checked="" type="checkbox"/> The statistical test(s) used AND whether they are one- or two-sided<br><i>Only common tests should be described solely by name; describe more complex techniques in the Methods section.</i>                                                               |
| <input checked="" type="checkbox"/> | <input type="checkbox"/> A description of all covariates tested                                                                                                                                                                                                                                |
| <input checked="" type="checkbox"/> | <input type="checkbox"/> A description of any assumptions or corrections, such as tests of normality and adjustment for multiple comparisons                                                                                                                                                   |
| <input type="checkbox"/>            | <input checked="" type="checkbox"/> A full description of the statistical parameters including central tendency (e.g. means) or other basic estimates (e.g. regression coefficient) AND variation (e.g. standard deviation) or associated estimates of uncertainty (e.g. confidence intervals) |
| <input type="checkbox"/>            | <input checked="" type="checkbox"/> For null hypothesis testing, the test statistic (e.g. $F$ , $t$ , $r$ ) with confidence intervals, effect sizes, degrees of freedom and $P$ value noted<br><i>Give <math>P</math> values as exact values whenever suitable.</i>                            |
| <input type="checkbox"/>            | <input checked="" type="checkbox"/> For Bayesian analysis, information on the choice of priors and Markov chain Monte Carlo settings                                                                                                                                                           |
| <input checked="" type="checkbox"/> | <input type="checkbox"/> For hierarchical and complex designs, identification of the appropriate level for tests and full reporting of outcomes                                                                                                                                                |
| <input checked="" type="checkbox"/> | <input type="checkbox"/> Estimates of effect sizes (e.g. Cohen's $d$ , Pearson's $r$ ), indicating how they were calculated                                                                                                                                                                    |

*Our web collection on [statistics for biologists](#) contains articles on many of the points above.*

### Software and code

Policy information about [availability of computer code](#)

#### Data collection

Flow cytometry performed on: BD FACSDivaTM software Version 8.0.1  
Absorbance and Relative Fluorescence Units performed on Molecular Devices Soft Max Pro 7.0.3  
Dynamic Light Scattering was performed on Malvern Panalytical Zetasizer software Xcalibur (Thermo Fisher Scientific, version 4.4)

#### Data analysis

Volocity software version 6.3 from Quorum technologies  
Graphpad Prism 8.4  
FlowJo LLC. Version 10.5.3.

For manuscripts utilizing custom algorithms or software that are central to the research but not yet described in published literature, software must be made available to editors and reviewers. We strongly encourage code deposition in a community repository (e.g. GitHub). See the Nature Portfolio [guidelines for submitting code & software](#) for further information.

## Data

Policy information about [availability of data](#)

All manuscripts must include a [data availability statement](#). This statement should provide the following information, where applicable:

- Accession codes, unique identifiers, or web links for publicly available datasets
- A description of any restrictions on data availability
- For clinical datasets or third party data, please ensure that the statement adheres to our [policy](#)

The authors declare that all data supporting the findings of this study are available within the paper and its supplementary information files. Please contact the corresponding author Dr. Matthew S. Macauley (macauley@ualberta.ca) for questions regarding the raw data. Further information will be made available upon reasonable request.

## Human research participants

Policy information about [studies involving human research participants and Sex and Gender in Research](#).

|                             |                                                                                                                                                                                      |
|-----------------------------|--------------------------------------------------------------------------------------------------------------------------------------------------------------------------------------|
| Reporting on sex and gender | We did not report on sex or gender on any of the human experiments as our ethics protocol did not allow for the collection of this information.                                      |
| Population characteristics  | Participants were chosen at random and were used as healthy controls. Information regarding their health, age, gender, or sex was not recorded.                                      |
| Recruitment                 | Participants were chosen on a volunteer basis. Selection biases are not applicable as all samples were healthy controls and are not being compared to other groups.                  |
| Ethics oversight            | All experiments involving human blood samples and placental sample collection were approved by the human research ethics board (HREB) biomedical panel at the University of Alberta. |

Note that full information on the approval of the study protocol must also be provided in the manuscript.

## Field-specific reporting

Please select the one below that is the best fit for your research. If you are not sure, read the appropriate sections before making your selection.

Life sciences  Behavioural & social sciences  Ecological, evolutionary & environmental sciences

For a reference copy of the document with all sections, see [nature.com/documents/nr-reporting-summary-flat.pdf](https://www.nature.com/documents/nr-reporting-summary-flat.pdf)

## Life sciences study design

All studies must disclose on these points even when the disclosure is negative.

|                 |                                                                                                                                                                                                                                                                                                                                                                                                                                                                     |
|-----------------|---------------------------------------------------------------------------------------------------------------------------------------------------------------------------------------------------------------------------------------------------------------------------------------------------------------------------------------------------------------------------------------------------------------------------------------------------------------------|
| Sample size     | <p>Sample size was for each experiment was influenced by sample availability however at least three biological replicates were used in each experiment involving human samples.</p> <p>-For human blood samples, four biological replicates were used to measure liposome binding.<br/>-For human placental samples at least three biological replicates were used for each experiment.<br/>-For human spleen experiments, six biological replicates were used.</p> |
| Data exclusions | No data was excluded from this study.                                                                                                                                                                                                                                                                                                                                                                                                                               |
| Replication     | <p>At least three analytical replicates were done for each experiment.</p> <p>At least three biological replicates each containing at least three technical replicates were performed for each human blood, placental, and spleen sample.</p> <p>All attempts at replication were successful.</p>                                                                                                                                                                   |
| Randomization   | No clinical trials were performed in this study so randomization was not necessary.                                                                                                                                                                                                                                                                                                                                                                                 |
| Blinding        | No clinical trials were performed in this study so blinding was not necessary.                                                                                                                                                                                                                                                                                                                                                                                      |

## Reporting for specific materials, systems and methods

We require information from authors about some types of materials, experimental systems and methods used in many studies. Here, indicate whether each material, system or method listed is relevant to your study. If you are not sure if a list item applies to your research, read the appropriate section before selecting a response.

## Materials & experimental systems

| n/a                                 | Involved in the study                                     |
|-------------------------------------|-----------------------------------------------------------|
| <input type="checkbox"/>            | <input checked="" type="checkbox"/> Antibodies            |
| <input type="checkbox"/>            | <input checked="" type="checkbox"/> Eukaryotic cell lines |
| <input checked="" type="checkbox"/> | <input type="checkbox"/> Palaeontology and archaeology    |
| <input checked="" type="checkbox"/> | <input type="checkbox"/> Animals and other organisms      |
| <input checked="" type="checkbox"/> | <input type="checkbox"/> Clinical data                    |
| <input checked="" type="checkbox"/> | <input type="checkbox"/> Dual use research of concern     |

## Methods

| n/a                                 | Involved in the study                              |
|-------------------------------------|----------------------------------------------------|
| <input checked="" type="checkbox"/> | <input type="checkbox"/> ChIP-seq                  |
| <input type="checkbox"/>            | <input checked="" type="checkbox"/> Flow cytometry |
| <input checked="" type="checkbox"/> | <input type="checkbox"/> MRI-based neuroimaging    |

## Antibodies

### Antibodies used

For flow cytometry analysis we used: anti-human CD169 (clone 7-239, PE, Biolegend, cat. no. 346003), anti-human CD22 (clone HIB22, PE, Biolegend, cat. no. 302506), anti-human CD33 (clone WM53, PE, Biolegend, cat. no. 983904), anti MAG (clone A-11, PE, Santa Cruz, cat. no. sc-166849 PE), anti-Siglec-5 (clone 1A5, PE, Biolegend, cat. no. 352003), anti-Siglec-6 (clone 767329, PE, R&D Systems, cat. no. FAB2859P), anti-Siglec-6 (clone, 767329, unlabeled, R&D Systems, cat. no. MAB2859-SP), anti-Siglec-6 (clone, AF594, R&D Systems, cat. no. FAB2859T-100UG), anti-CD328 (clone 6-434, PE, Biolegend, cat. no. 339203), anti-Siglec-8 (clone 7C9, PE, Biolegend, cat. no. 347103), anti-Siglec-9 (clone K8, PE, Biolegend, cat. no. 351503), anti-Siglec-10 (clone 5G6, PE, Biolegend, cat. no. 347603), anti-Siglec-11 (clone 4C4, unlabeled, Biolegend, cat. no. 681702), anti-Siglec-15 (unlabeled, non-commercial), anti-mouse IgG1 (clone RMG1-1, PE, Biolegend, cat. no. 406607), anti-mouse IgG2b (clone RMG2b-1, PE, Biolegend, cat. no. 406707), Donkey anti-Mouse IgG (AF594, thermofisher, cat. no. A-21203), anti-CD19 (clone HIB19, AF488, Biolegend, cat. no. 302219), anti-CD3 (clone UCHT1, BV605, Biolegend, cat. no. 317321), anti-CD27 (clone M-T271, PerCP/Cyanine5.5, Biolegend, cat. no. 348207), anti-CD38 (clone HB-7, BV650, Biolegend, cat. no. 356619), anti-CD22 (clone S-HCL-1, BV421, Biolegend, cat. no. 302523), anti-CD117 (clone S18022G, PE, Biolegend, cat. no. 332203), anti-FcεR1α (clone AER-37, BV421, Biolegend, cat. no. 334623), anti-CD34 (clone 581, BV510, Biolegend, cat. no. 343527), anti-CD19 (clone SJ25C1, APC/Cyanine7, Biolegend, cat. no. 302217), CD14 (clone M5E2, BV605, Biolegend, cat. no. 301833), anti-CD3 (clone OKT3, BV650, Biolegend, cat. no. 317323) anti-Siglec-8 (clone 7C9, PE/Cyanine7, Biolegend, cat. no. 347111a).

### Validation

All of the antibodies except for anti-Siglec-15 were commercially purchased from the following companies according to the links provided : 1) <https://www.biolegend.com/fr-ch>, 2) <https://www.scbt.com/home>, 3) <https://www.rndsystems.com>, 4) <https://www.thermofisher.com/ca/en/home.html>. Commercial antibodies were quality control tested by immunofluorescence staining with flow cytometric analysis by the companies. The anti-Siglec-15 antibody was validated by staining anti Siglec-15 expressing cells. More information regarding anti-Siglec-15 can be found at <https://doi.org/10.1093/glycob/cwm049>.

## Eukaryotic cell lines

Policy information about [cell lines and Sex and Gender in Research](#)

### Cell line source(s)

Chinese Hamster Ovary, Daudi, HEK293T, LAD2, N2a

### Authentication

All the parental cell lines were purchased from ATCC, cell lines were not authenticated within the lab.

### Mycoplasma contamination

No Mycoplasma contamination detected (ABM Mycoplasma detection kit, Canada).

### Commonly misidentified lines (See [ICLAC](#) register)

No commonly misidentified cell lines were used in the study.

## Flow Cytometry

### Plots

Confirm that:

- The axis labels state the marker and fluorochrome used (e.g. CD4-FITC).
- The axis scales are clearly visible. Include numbers along axes only for bottom left plot of group (a 'group' is an analysis of identical markers).
- All plots are contour plots with outliers or pseudocolor plots.
- A numerical value for number of cells or percentage (with statistics) is provided.

## Methodology

### Sample preparation

For adherent cell lines studied, cells were removed from the plate using 1 mM EDTA/PBS and centrifuged at 300 rcf for 5 minutes before staining. All flow samples were run in flow buffer (HBSS containing Calcium and Magnesium, 0.1% BSA) or FACS buffer (HBSS containing 1% FBS and 500 μM EDTA).

|                           |                                                                                                                                                                                                                                                                                                                                                                                                                                                                                                                                                                                                                  |
|---------------------------|------------------------------------------------------------------------------------------------------------------------------------------------------------------------------------------------------------------------------------------------------------------------------------------------------------------------------------------------------------------------------------------------------------------------------------------------------------------------------------------------------------------------------------------------------------------------------------------------------------------|
| Instrument                | BD LSRFortessa TM X-20                                                                                                                                                                                                                                                                                                                                                                                                                                                                                                                                                                                           |
| Software                  | BD FACSDiva™ software V8.0.1                                                                                                                                                                                                                                                                                                                                                                                                                                                                                                                                                                                     |
| Cell population abundance | At least 10,000 cells were collected for staining, binding and internalization studies.                                                                                                                                                                                                                                                                                                                                                                                                                                                                                                                          |
| Gating strategy           | <p>Cells in all experiments are initially gated through SSC-A/FSC-A channels looking at live cells, then are further gated through SSC-W/FSC-A channels looking at singlet populations. For Liposome binding assay, Siglec expressing CHO cells were than gated on the Siglec positive population and the liposome binding of this population was reported.</p> <p>For isolation of memory B-cells, memory B-cells are defined as CD19+, CD22+, CD27+, IgD-, CD38- and Naïve B-cells are defined as CD19+, CD22+, CD27-, IgD+.</p> <p>For isolation of mast cells, mast cells were defined as CD117+ FcεR1+.</p> |

Tick this box to confirm that a figure exemplifying the gating strategy is provided in the Supplementary Information.
